# Supplementary material for: The causal role of immune cells on lung cancer: a bi-directional Mendelian randomization (MR) study
Source: Aging (Albany NY). 2024 Jun 12;16(11):10063–73. doi: 10.18632/aging.205917 (PMC11210237; doi:10.18632/aging.205917)
Supplement: Supplementary Table 1 [file aging-16-205917-s001.xlsx]

## Sheet: 工作表1
Supplementary Table 1. The heterogeneity test was performed with Cochran’s Q statistic.
outcome	exposure.id	exposure	Trait type	Panel	method	Q	Q_df	Q_pval
Lung cancer	ebi-a-GCST90001398	Unsw mem AC	Absolute count	B cell	Inverse variance weighted	15.777	21	0.782046
Lung cancer	ebi-a-GCST90001428	IgD- CD38dim %B cell	Relative count	B cell	Inverse variance weighted	21.0455	25	0.690068
Lung cancer	ebi-a-GCST90001447	IgD+ CD38br %B cell	Relative count	B cell	Inverse variance weighted	24.8705	26	0.526315
Lung cancer	ebi-a-GCST90001496	CD39+ secreting Treg %secreting Treg	Relative count	Treg	Inverse variance weighted	16.8593	27	0.934534
Lung cancer	ebi-a-GCST90001497	CD39+ secreting Treg %CD4 Treg	Relative count	Treg	Inverse variance weighted	8.82366	21	0.990535
Lung cancer	ebi-a-GCST90001504	CD25hi AC	Absolute count	Treg	Inverse variance weighted	17.8032	22	0.717593
Lung cancer	ebi-a-GCST90001542	EM CD4+ AC	Absolute count	Maturation stages of T cell	Inverse variance weighted	22.0984	22	0.454026
Lung cancer	ebi-a-GCST90001592	CD8br AC	Absolute count	TBNK	Inverse variance weighted	23.4662	22	0.37582
Lung cancer	ebi-a-GCST90001604	T cell %lymphocyte	Relative count	TBNK	Inverse variance weighted	9.50599	16	0.891123
Lung cancer	ebi-a-GCST90001626	HLA DR+ CD4+ %lymphocyte	Relative count	TBNK	Inverse variance weighted	19.2538	21	0.568865
Lung cancer	ebi-a-GCST90001694	CD28- DN (CD4-CD8-) %T cell	Relative count	Treg	Inverse variance weighted	22.8434	24	0.529056
Lung cancer	ebi-a-GCST90001714	BAFF-R on IgD- CD38dim	MFI	B cell	Inverse variance weighted	2.17497	3	0.536896
Lung cancer	ebi-a-GCST90001715	BAFF-R on memory B cell	MFI	B cell	Inverse variance weighted	15.9542	17	0.527082
Lung cancer	ebi-a-GCST90001743	CD20 on B cell	MFI	B cell	Inverse variance weighted	25.5971	25	0.429342
Lung cancer	ebi-a-GCST90001755	CD20 on IgD- CD38-	MFI	B cell	Inverse variance weighted	49.4313	28	0.00747978
Lung cancer	ebi-a-GCST90001761	CD20 on sw mem	MFI	B cell	Inverse variance weighted	52.7856	31	0.00866145
Lung cancer	ebi-a-GCST90001761 after adjusted	CD20 on sw mem	MFI	B cell	Inverse variance weighted	42.0321	30	0.0711222
Lung cancer	ebi-a-GCST90001827	IgD on IgD+	MFI	B cell	Inverse variance weighted	37.9888	21	0.0129275
Lung cancer	ebi-a-GCST90001827 after adjusted	IgD on IgD+	MFI	B cell	Inverse variance weighted	37.7967	20	0.00937584
Lung cancer	ebi-a-GCST90001861	CD3 on CD28+ CD4+	MFI	Treg	Inverse variance weighted	18.5629	24	0.774879
Lung cancer	ebi-a-GCST90001870	CD34 on HSC	MFI	Myeloid cell	Inverse variance weighted	20.6057	13	0.0811016
Lung cancer	ebi-a-GCST90001902	CD28 on activated Treg	MFI	Treg	Inverse variance weighted	11.1023	17	0.851199
Lung cancer	ebi-a-GCST90001913	CD45 on granulocyte	MFI	TBNK	Inverse variance weighted	23.8552	15	0.0675929
Lung cancer	ebi-a-GCST90001961	CD25 on CD39+ CD4+	MFI	Treg	Inverse variance weighted	25.7335	22	0.263299
Lung cancer	ebi-a-GCST90002043	CD45 on CD33br HLA DR+ CD14dim	MFI	Myeloid cell	Inverse variance weighted	15.6484	15	0.405794
Lung cancer	ebi-a-GCST90002051	CD45 on basophil	MFI	Myeloid cell	Inverse variance weighted	17.0338	18	0.520782
Lung cancer	ebi-a-GCST90002059	CD8 on NKT	MFI	TBNK	Inverse variance weighted	29.2662	18	0.0452209
Lung cancer	ebi-a-GCST90002065	CD4 on CD39+ resting Treg	MFI	Treg	Inverse variance weighted	7.04614	14	0.932919
Lung cancer	ebi-a-GCST90002071	SSC-A on myeloid DC	Morphological parameter	cDC	Inverse variance weighted	20.574	18	0.301447
Lung cancer	ebi-a-GCST90001398	Unsw mem AC	Absolute count	B cell	MR Egger	15.6545	20	0.737813
Lung cancer	ebi-a-GCST90001428	IgD- CD38dim %B cell	Relative count	B cell	MR Egger	20.9773	24	0.640061
Lung cancer	ebi-a-GCST90001447	IgD+ CD38br %B cell	Relative count	B cell	MR Egger	22.2869	25	0.619128
Lung cancer	ebi-a-GCST90001496	CD39+ secreting Treg %secreting Treg	Relative count	Treg	MR Egger	16.5758	26	0.921339
Lung cancer	ebi-a-GCST90001497	CD39+ secreting Treg %CD4 Treg	Relative count	Treg	MR Egger	8.75958	20	0.985528
Lung cancer	ebi-a-GCST90001504	CD25hi AC	Absolute count	Treg	MR Egger	17.7483	21	0.664872
Lung cancer	ebi-a-GCST90001542	EM CD4+ AC	Absolute count	Maturation stages of T cell	MR Egger	21.2351	21	0.444668
Lung cancer	ebi-a-GCST90001592	CD8br AC	Absolute count	TBNK	MR Egger	21.2324	21	0.444832
Lung cancer	ebi-a-GCST90001604	T cell %lymphocyte	Relative count	TBNK	MR Egger	9.50015	15	0.84995
Lung cancer	ebi-a-GCST90001626	HLA DR+ CD4+ %lymphocyte	Relative count	TBNK	MR Egger	18.4759	20	0.55609
Lung cancer	ebi-a-GCST90001694	CD28- DN (CD4-CD8-) %T cell	Relative count	Treg	MR Egger	22.8065	23	0.472118
Lung cancer	ebi-a-GCST90001714	BAFF-R on IgD- CD38dim	MFI	B cell	MR Egger	1.92695	2	0.381565
Lung cancer	ebi-a-GCST90001715	BAFF-R on memory B cell	MFI	B cell	MR Egger	15.6816	16	0.475398
Lung cancer	ebi-a-GCST90001743	CD20 on B cell	MFI	B cell	MR Egger	24.5202	24	0.432197
Lung cancer	ebi-a-GCST90001755	CD20 on IgD- CD38-	MFI	B cell	MR Egger	44.453	27	0.0185566
Lung cancer	ebi-a-GCST90001761	CD20 on sw mem	MFI	B cell	MR Egger	52.2309	30	0.00719157
Lung cancer	ebi-a-GCST90001761 after adjusted	CD20 on sw mem	MFI	B cell	MR Egger	40.4458	29	0.0769074
Lung cancer	ebi-a-GCST90001827	IgD on IgD+	MFI	B cell	MR Egger	33.4343	20	0.0302157
Lung cancer	ebi-a-GCST90001827 after adjusted	IgD on IgD+	MFI	B cell	MR Egger	33.4075	19	0.0215633
Lung cancer	ebi-a-GCST90001861	CD3 on CD28+ CD4+	MFI	Treg	MR Egger	17.5539	23	0.781215
Lung cancer	ebi-a-GCST90001870	CD34 on HSC	MFI	Myeloid cell	MR Egger	19.7928	12	0.0711083
Lung cancer	ebi-a-GCST90001902	CD28 on activated Treg	MFI	Treg	MR Egger	11.0236	16	0.808025
Lung cancer	ebi-a-GCST90001913	CD45 on granulocyte	MFI	TBNK	MR Egger	23.4091	14	0.0539302
Lung cancer	ebi-a-GCST90001961	CD25 on CD39+ CD4+	MFI	Treg	MR Egger	24.131	21	0.286756
Lung cancer	ebi-a-GCST90002043	CD45 on CD33br HLA DR+ CD14dim	MFI	Myeloid cell	MR Egger	15.6314	14	0.336401
Lung cancer	ebi-a-GCST90002051	CD45 on basophil	MFI	Myeloid cell	MR Egger	14.3459	17	0.642483
Lung cancer	ebi-a-GCST90002059	CD8 on NKT	MFI	TBNK	MR Egger	27.9428	17	0.045611
Lung cancer	ebi-a-GCST90002065	CD4 on CD39+ resting Treg	MFI	Treg	MR Egger	6.82645	13	0.910872
Lung cancer	ebi-a-GCST90002071	SSC-A on myeloid DC	Morphological parameter	cDC	MR Egger	19.8849	17	0.280159
Non-Small cell lung cancer	ebi-a-GCST90001399	IgD- CD27- %B cell	Relative count	B cell	Inverse variance weighted	18.2377	15	0.250373
Non-Small cell lung cancer	ebi-a-GCST90001400	IgD+ AC	Absolute count	B cell	Inverse variance weighted	20.3964	13	0.0857576
Non-Small cell lung cancer	ebi-a-GCST90001462	CD62L- DC AC	Absolute count	cDC	Inverse variance weighted	18.6695	18	0.412434
Non-Small cell lung cancer	ebi-a-GCST90001468	CD62L- myeloid DC AC	Absolute count	cDC	Inverse variance weighted	14.8905	16	0.53267
Non-Small cell lung cancer	ebi-a-GCST90001484	CD39+ resting Treg %resting Treg	Relative count	Treg	Inverse variance weighted	21.2787	25	0.676968
Non-Small cell lung cancer	ebi-a-GCST90001630	CD8br NKT AC	Absolute count	TBNK	Inverse variance weighted	24.4054	25	0.496058
Non-Small cell lung cancer	ebi-a-GCST90001649	HLA DR+ NK %NK	Relative count	TBNK	Inverse variance weighted	17.5922	23	0.779218
Non-Small cell lung cancer	ebi-a-GCST90001650	HLA DR+ NK %CD3- lymphocyte	Relative count	TBNK	Inverse variance weighted	13.784	22	0.908969
Non-Small cell lung cancer	ebi-a-GCST90001657	CD28+ DN (CD4-CD8-) AC	Absolute count	Treg	Inverse variance weighted	8.4842	10	0.581651
Non-Small cell lung cancer	ebi-a-GCST90001673	CD28- CD127- CD25++ CD8br %T cell	Relative count	Treg	Inverse variance weighted	11.6391	19	0.900466
Non-Small cell lung cancer	ebi-a-GCST90001702	BAFF-R on CD24+ CD27+	MFI	B cell	Inverse variance weighted	15.2389	18	0.645503
Non-Small cell lung cancer	ebi-a-GCST90001703	BAFF-R on IgD+ CD24+	MFI	B cell	Inverse variance weighted	19.6397	17	0.293072
Non-Small cell lung cancer	ebi-a-GCST90001704	BAFF-R on IgD+ CD24-	MFI	B cell	Inverse variance weighted	21.6113	21	0.4222
Non-Small cell lung cancer	ebi-a-GCST90001705	BAFF-R on IgD+ CD38-	MFI	B cell	Inverse variance weighted	25.4247	21	0.22924
Non-Small cell lung cancer	ebi-a-GCST90001706	BAFF-R on IgD+ CD38- naive	MFI	B cell	Inverse variance weighted	33.1867	26	0.15675
Non-Small cell lung cancer	ebi-a-GCST90001709	BAFF-R on IgD+ CD38dim	MFI	B cell	Inverse variance weighted	28.2963	24	0.247741
Non-Small cell lung cancer	ebi-a-GCST90001711	BAFF-R on IgD- CD27-	MFI	B cell	Inverse variance weighted	10.4211	17	0.885029
Non-Small cell lung cancer	ebi-a-GCST90001712	BAFF-R on IgD- CD38-	MFI	B cell	Inverse variance weighted	9.07797	16	0.910168
Non-Small cell lung cancer	ebi-a-GCST90001715	BAFF-R on memory B cell	MFI	B cell	Inverse variance weighted	11.977	16	0.745564
Non-Small cell lung cancer	ebi-a-GCST90001716	BAFF-R on naive-mature B cell	MFI	B cell	Inverse variance weighted	22.9066	22	0.407018
Non-Small cell lung cancer	ebi-a-GCST90001717	BAFF-R on unsw mem	MFI	B cell	Inverse variance weighted	18.5755	23	0.725569
Non-Small cell lung cancer	ebi-a-GCST90001718	BAFF-R on sw mem	MFI	B cell	Inverse variance weighted	12.9494	18	0.794572
Non-Small cell lung cancer	ebi-a-GCST90001719	BAFF-R on IgD+	MFI	B cell	Inverse variance weighted	26.3348	23	0.285318
Non-Small cell lung cancer	ebi-a-GCST90001720	BAFF-R on transitional	MFI	B cell	Inverse variance weighted	20.6449	24	0.659575
Non-Small cell lung cancer	ebi-a-GCST90001744	CD20 on CD20- CD38-	MFI	B cell	Inverse variance weighted	14.8147	15	0.464847
Non-Small cell lung cancer	ebi-a-GCST90001754	CD20 on IgD- CD27-	MFI	B cell	Inverse variance weighted	19.5446	17	0.298184
Non-Small cell lung cancer	ebi-a-GCST90001755	CD20 on IgD- CD38-	MFI	B cell	Inverse variance weighted	28.2157	28	0.453063
Non-Small cell lung cancer	ebi-a-GCST90001786	CD25 on IgD- CD27-	MFI	B cell	Inverse variance weighted	16.5243	20	0.683609
Non-Small cell lung cancer	ebi-a-GCST90001829	BAFF-R on B cell	MFI	B cell	Inverse variance weighted	22.0569	20	0.337432
Non-Small cell lung cancer	ebi-a-GCST90001838	CD3 on naive CD8br	MFI	Maturation stages of T cell	Inverse variance weighted	22.2355	24	0.565212
Non-Small cell lung cancer	ebi-a-GCST90001842	CD3 on Naive CD4+	MFI	Maturation stages of T cell	Inverse variance weighted	15.5753	27	0.960566
Non-Small cell lung cancer	ebi-a-GCST90001861	CD3 on CD28+ CD4+	MFI	Treg	Inverse variance weighted	19.9093	24	0.70192
Non-Small cell lung cancer	ebi-a-GCST90001890	CD28 on CD45RA+ CD4+	MFI	Treg	Inverse variance weighted	7.02693	12	0.855829
Non-Small cell lung cancer	ebi-a-GCST90001901	CD28 on CD39+ resting Treg	MFI	Treg	Inverse variance weighted	17.2818	19	0.570782
Non-Small cell lung cancer	ebi-a-GCST90001903	CD86 on myeloid DC	MFI	cDC	Inverse variance weighted	11.3167	18	0.880439
Non-Small cell lung cancer	ebi-a-GCST90001920	CD45 on HLA DR+ CD4+	MFI	TBNK	Inverse variance weighted	7.41968	16	0.964299
Non-Small cell lung cancer	ebi-a-GCST90001999	PDL-1 on CD14- CD16+ monocyte	MFI	Monocyte	Inverse variance weighted	12.3555	19	0.869871
Non-Small cell lung cancer	ebi-a-GCST90002001	CD64 on CD14- CD16-	MFI	Monocyte	Inverse variance weighted	12.7392	14	0.547152
Non-Small cell lung cancer	ebi-a-GCST90002004	CCR2 on CD14+ CD16- monocyte	MFI	Monocyte	Inverse variance weighted	25.3594	25	0.442381
Non-Small cell lung cancer	ebi-a-GCST90002015	CCR2 on plasmacytoid DC	MFI	cDC	Inverse variance weighted	16.4645	18	0.560166
Non-Small cell lung cancer	ebi-a-GCST90002016	CCR2 on CD62L+ plasmacytoid DC	MFI	cDC	Inverse variance weighted	22.4964	18	0.210689
Non-Small cell lung cancer	ebi-a-GCST90002034	CD39 on monocyte	MFI	Treg	Inverse variance weighted	16.2675	21	0.754438
Non-Small cell lung cancer	ebi-a-GCST90002086	SSC-A on HLA DR+ CD8br	Morphological parameter	TBNK	Inverse variance weighted	21.492	23	0.551071
Non-Small cell lung cancer	ebi-a-GCST90002095	CD11b on CD33dim HLA DR-	MFI	Myeloid cell	Inverse variance weighted	20.3207	21	0.501038
Non-Small cell lung cancer	ebi-a-GCST90002106	HLA DR on DC	MFI	cDC	Inverse variance weighted	14.2386	18	0.713411
Non-Small cell lung cancer	ebi-a-GCST90001399	IgD- CD27- %B cell	Relative count	B cell	MR Egger	15.8862	14	0.320372
Non-Small cell lung cancer	ebi-a-GCST90001400	IgD+ AC	Absolute count	B cell	MR Egger	17.1955	12	0.142391
Non-Small cell lung cancer	ebi-a-GCST90001462	CD62L- DC AC	Absolute count	cDC	MR Egger	16.6566	17	0.477855
Non-Small cell lung cancer	ebi-a-GCST90001468	CD62L- myeloid DC AC	Absolute count	cDC	MR Egger	14.5479	15	0.484444
Non-Small cell lung cancer	ebi-a-GCST90001484	CD39+ resting Treg %resting Treg	Relative count	Treg	MR Egger	21.0173	24	0.637703
Non-Small cell lung cancer	ebi-a-GCST90001630	CD8br NKT AC	Absolute count	TBNK	MR Egger	24.3475	24	0.441876
Non-Small cell lung cancer	ebi-a-GCST90001649	HLA DR+ NK %NK	Relative count	TBNK	MR Egger	17.592	22	0.729888
Non-Small cell lung cancer	ebi-a-GCST90001650	HLA DR+ NK %CD3- lymphocyte	Relative count	TBNK	MR Egger	13.1173	21	0.904459
Non-Small cell lung cancer	ebi-a-GCST90001657	CD28+ DN (CD4-CD8-) AC	Absolute count	Treg	MR Egger	6.36489	9	0.702916
Non-Small cell lung cancer	ebi-a-GCST90001673	CD28- CD127- CD25++ CD8br %T cell	Relative count	Treg	MR Egger	11.6375	18	0.865379
Non-Small cell lung cancer	ebi-a-GCST90001702	BAFF-R on CD24+ CD27+	MFI	B cell	MR Egger	13.4428	17	0.706075
Non-Small cell lung cancer	ebi-a-GCST90001703	BAFF-R on IgD+ CD24+	MFI	B cell	MR Egger	18.7	16	0.284528
Non-Small cell lung cancer	ebi-a-GCST90001704	BAFF-R on IgD+ CD24-	MFI	B cell	MR Egger	18.5798	20	0.549272
Non-Small cell lung cancer	ebi-a-GCST90001705	BAFF-R on IgD+ CD38-	MFI	B cell	MR Egger	20.0766	20	0.453146
Non-Small cell lung cancer	ebi-a-GCST90001706	BAFF-R on IgD+ CD38- naive	MFI	B cell	MR Egger	32.0523	25	0.156503
Non-Small cell lung cancer	ebi-a-GCST90001709	BAFF-R on IgD+ CD38dim	MFI	B cell	MR Egger	23.3459	23	0.44073
Non-Small cell lung cancer	ebi-a-GCST90001711	BAFF-R on IgD- CD27-	MFI	B cell	MR Egger	8.55639	16	0.930553
Non-Small cell lung cancer	ebi-a-GCST90001712	BAFF-R on IgD- CD38-	MFI	B cell	MR Egger	9.06767	15	0.873953
Non-Small cell lung cancer	ebi-a-GCST90001715	BAFF-R on memory B cell	MFI	B cell	MR Egger	11.2562	15	0.734234
Non-Small cell lung cancer	ebi-a-GCST90001716	BAFF-R on naive-mature B cell	MFI	B cell	MR Egger	20.255	21	0.505167
Non-Small cell lung cancer	ebi-a-GCST90001717	BAFF-R on unsw mem	MFI	B cell	MR Egger	16.164	22	0.807665
Non-Small cell lung cancer	ebi-a-GCST90001718	BAFF-R on sw mem	MFI	B cell	MR Egger	10.8121	17	0.866164
Non-Small cell lung cancer	ebi-a-GCST90001719	BAFF-R on IgD+	MFI	B cell	MR Egger	19.4121	22	0.619764
Non-Small cell lung cancer	ebi-a-GCST90001720	BAFF-R on transitional	MFI	B cell	MR Egger	20.5451	23	0.608845
Non-Small cell lung cancer	ebi-a-GCST90001744	CD20 on CD20- CD38-	MFI	B cell	MR Egger	14.5261	14	0.411296
Non-Small cell lung cancer	ebi-a-GCST90001754	CD20 on IgD- CD27-	MFI	B cell	MR Egger	16.013	16	0.452052
Non-Small cell lung cancer	ebi-a-GCST90001755	CD20 on IgD- CD38-	MFI	B cell	MR Egger	27.3551	27	0.444768
Non-Small cell lung cancer	ebi-a-GCST90001786	CD25 on IgD- CD27-	MFI	B cell	MR Egger	15.8637	19	0.666349
Non-Small cell lung cancer	ebi-a-GCST90001829	BAFF-R on B cell	MFI	B cell	MR Egger	19.7812	19	0.407848
Non-Small cell lung cancer	ebi-a-GCST90001838	CD3 on naive CD8br	MFI	Maturation stages of T cell	MR Egger	17.5825	23	0.779723
Non-Small cell lung cancer	ebi-a-GCST90001842	CD3 on Naive CD4+	MFI	Maturation stages of T cell	MR Egger	15.2755	26	0.952084
Non-Small cell lung cancer	ebi-a-GCST90001861	CD3 on CD28+ CD4+	MFI	Treg	MR Egger	18.4451	23	0.732919
Non-Small cell lung cancer	ebi-a-GCST90001890	CD28 on CD45RA+ CD4+	MFI	Treg	MR Egger	6.96791	11	0.801676
Non-Small cell lung cancer	ebi-a-GCST90001901	CD28 on CD39+ resting Treg	MFI	Treg	MR Egger	17.2764	18	0.504182
Non-Small cell lung cancer	ebi-a-GCST90001903	CD86 on myeloid DC	MFI	cDC	MR Egger	10.5307	17	0.879897
Non-Small cell lung cancer	ebi-a-GCST90001920	CD45 on HLA DR+ CD4+	MFI	TBNK	MR Egger	6.93098	15	0.959537
Non-Small cell lung cancer	ebi-a-GCST90001999	PDL-1 on CD14- CD16+ monocyte	MFI	Monocyte	MR Egger	11.3341	18	0.879647
Non-Small cell lung cancer	ebi-a-GCST90002001	CD64 on CD14- CD16-	MFI	Monocyte	MR Egger	12.7387	13	0.468188
Non-Small cell lung cancer	ebi-a-GCST90002004	CCR2 on CD14+ CD16- monocyte	MFI	Monocyte	MR Egger	24.801	24	0.416636
Non-Small cell lung cancer	ebi-a-GCST90002015	CCR2 on plasmacytoid DC	MFI	cDC	MR Egger	15.8122	17	0.537183
Non-Small cell lung cancer	ebi-a-GCST90002016	CCR2 on CD62L+ plasmacytoid DC	MFI	cDC	MR Egger	21.8212	17	0.191692
Non-Small cell lung cancer	ebi-a-GCST90002034	CD39 on monocyte	MFI	Treg	MR Egger	14.4631	20	0.806261
Non-Small cell lung cancer	ebi-a-GCST90002086	SSC-A on HLA DR+ CD8br	Morphological parameter	TBNK	MR Egger	18.8489	22	0.654642
Non-Small cell lung cancer	ebi-a-GCST90002095	CD11b on CD33dim HLA DR-	MFI	Myeloid cell	MR Egger	19.5456	20	0.486658
Non-Small cell lung cancer	ebi-a-GCST90002106	HLA DR on DC	MFI	cDC	MR Egger	14.1441	17	0.656873
Small cell lung cancer	ebi-a-GCST90001404	PB/PC %B cell	Relative count	B cell	Inverse variance weighted	27.8062	26	0.368058
Small cell lung cancer	ebi-a-GCST90001433	IgD- CD27- %lymphocyte	Relative count	B cell	Inverse variance weighted	15.6547	15	0.405364
Small cell lung cancer	ebi-a-GCST90001440	IgD- CD24- %lymphocyte	Relative count	B cell	Inverse variance weighted	17.5206	23	0.78295
Small cell lung cancer	ebi-a-GCST90001466	CD86+ plasmacytoid DC AC	Absolute count	cDC	Inverse variance weighted	17.2526	19	0.572759
Small cell lung cancer	ebi-a-GCST90001470	CD62L- plasmacytoid DC AC	MFI	cDC	Inverse variance weighted	16.6502	23	0.826058
Small cell lung cancer	ebi-a-GCST90001492	Secreting Treg AC	Absolute count	Treg	Inverse variance weighted	23.2814	21	0.329159
Small cell lung cancer	ebi-a-GCST90001494	Secreting Treg %CD4	Relative count	Treg	Inverse variance weighted	27.289	24	0.291161
Small cell lung cancer	ebi-a-GCST90001501	Activated & secreting Treg AC	Absolute count	Treg	Inverse variance weighted	20.6664	20	0.416997
Small cell lung cancer	ebi-a-GCST90001679	CD25++ CD8br %T cell	Relative count	Treg	Inverse variance weighted	11.0243	16	0.807981
Small cell lung cancer	ebi-a-GCST90001680	CD25++ CD8br %CD8br	Relative count	Treg	Inverse variance weighted	18.4326	21	0.621486
Small cell lung cancer	ebi-a-GCST90001729	CD19 on IgD+ CD38br	MFI	B cell	Inverse variance weighted	11.5939	21	0.949937
Small cell lung cancer	ebi-a-GCST90001740	CD19 on sw mem	MFI	B cell	Inverse variance weighted	31.6966	27	0.243509
Small cell lung cancer	ebi-a-GCST90001753	CD20 on IgD- CD24-	MFI	B cell	Inverse variance weighted	25.3323	25	0.44388
Small cell lung cancer	ebi-a-GCST90001787	CD25 on IgD- CD38-	MFI	B cell	Inverse variance weighted	14.6066	21	0.842162
Small cell lung cancer	ebi-a-GCST90001814	CD38 on IgD- CD38br	MFI	B cell	Inverse variance weighted	7.54843	12	0.819349
Small cell lung cancer	ebi-a-GCST90001827	IgD on IgD+	MFI	B cell	Inverse variance weighted	19.4621	20	0.491996
Small cell lung cancer	ebi-a-GCST90001861	CD3 on CD28+ CD4+	MFI	Treg	Inverse variance weighted	31.2203	24	0.147532
Small cell lung cancer	ebi-a-GCST90001905	CD86 on monocyte	MFI	cDC	Inverse variance weighted	23.6278	15	0.0716895
Small cell lung cancer	ebi-a-GCST90001921	CD45 on HLA DR+ CD8br	MFI	TBNK	Inverse variance weighted	16.0424	18	0.589589
Small cell lung cancer	ebi-a-GCST90001925	CD127 on CD28+ DN (CD4-CD8-)	MFI	Treg	Inverse variance weighted	17.6936	21	0.6683
Small cell lung cancer	ebi-a-GCST90001939	CD25 on activated Treg	MFI	Treg	Inverse variance weighted	11.4778	16	0.779075
Small cell lung cancer	ebi-a-GCST90001967	FSC-A on CD14+ monocyte	Morphological parameter	TBNK	Inverse variance weighted	15.823	23	0.862741
Small cell lung cancer	ebi-a-GCST90001992	CCR2 on CD14+ CD16+ monocyte	MFI	Monocyte	Inverse variance weighted	25.6384	36	0.900128
Small cell lung cancer	ebi-a-GCST90002036	CD80 on CD62L+ myeloid DC	MFI	cDC	Inverse variance weighted	21.251	25	0.678536
Small cell lung cancer	ebi-a-GCST90002083	SSC-A on HLA DR+ T cell	Morphological parameter	TBNK	Inverse variance weighted	20.7135	21	0.476559
Small cell lung cancer	ebi-a-GCST90002111	HLA DR on CD33dim HLA DR+ CD11b-	MFI	Myeloid cell	Inverse variance weighted	13.9497	17	0.670657
Small cell lung cancer	ebi-a-GCST90001404	PB/PC %B cell	Relative count	B cell	MR Egger	27.7614	25	0.318955
Small cell lung cancer	ebi-a-GCST90001433	IgD- CD27- %lymphocyte	Relative count	B cell	MR Egger	12.8949	14	0.534814
Small cell lung cancer	ebi-a-GCST90001440	IgD- CD24- %lymphocyte	Relative count	B cell	MR Egger	15.872	22	0.822188
Small cell lung cancer	ebi-a-GCST90001466	CD86+ plasmacytoid DC AC	Absolute count	cDC	MR Egger	17.2214	18	0.507936
Small cell lung cancer	ebi-a-GCST90001470	CD62L- plasmacytoid DC AC	MFI	cDC	MR Egger	16.6439	22	0.782697
Small cell lung cancer	ebi-a-GCST90001492	Secreting Treg AC	Absolute count	Treg	MR Egger	22.4948	20	0.314276
Small cell lung cancer	ebi-a-GCST90001494	Secreting Treg %CD4	Relative count	Treg	MR Egger	27.1525	23	0.249531
Small cell lung cancer	ebi-a-GCST90001501	Activated & secreting Treg AC	Absolute count	Treg	MR Egger	18.0229	19	0.520911
Small cell lung cancer	ebi-a-GCST90001679	CD25++ CD8br %T cell	Relative count	Treg	MR Egger	10.6898	15	0.774261
Small cell lung cancer	ebi-a-GCST90001680	CD25++ CD8br %CD8br	Relative count	Treg	MR Egger	18.2393	20	0.571647
Small cell lung cancer	ebi-a-GCST90001729	CD19 on IgD+ CD38br	MFI	B cell	MR Egger	10.3522	20	0.961327
Small cell lung cancer	ebi-a-GCST90001740	CD19 on sw mem	MFI	B cell	MR Egger	31.0029	26	0.228163
Small cell lung cancer	ebi-a-GCST90001753	CD20 on IgD- CD24-	MFI	B cell	MR Egger	25.0869	24	0.401052
Small cell lung cancer	ebi-a-GCST90001787	CD25 on IgD- CD38-	MFI	B cell	MR Egger	13.3457	20	0.862065
Small cell lung cancer	ebi-a-GCST90001814	CD38 on IgD- CD38br	MFI	B cell	MR Egger	6.21109	11	0.858915
Small cell lung cancer	ebi-a-GCST90001827	IgD on IgD+	MFI	B cell	MR Egger	19.3097	19	0.437136
Small cell lung cancer	ebi-a-GCST90001861	CD3 on CD28+ CD4+	MFI	Treg	MR Egger	29.7749	23	0.155972
Small cell lung cancer	ebi-a-GCST90001905	CD86 on monocyte	MFI	cDC	MR Egger	20.3473	14	0.119567
Small cell lung cancer	ebi-a-GCST90001921	CD45 on HLA DR+ CD8br	MFI	TBNK	MR Egger	15.4165	17	0.565506
Small cell lung cancer	ebi-a-GCST90001925	CD127 on CD28+ DN (CD4-CD8-)	MFI	Treg	MR Egger	17.0783	20	0.647886
Small cell lung cancer	ebi-a-GCST90001939	CD25 on activated Treg	MFI	Treg	MR Egger	9.41114	15	0.855059
Small cell lung cancer	ebi-a-GCST90001967	FSC-A on CD14+ monocyte	Morphological parameter	TBNK	MR Egger	15.0873	22	0.858464
Small cell lung cancer	ebi-a-GCST90001992	CCR2 on CD14+ CD16+ monocyte	MFI	Monocyte	MR Egger	24.979	35	0.895106
Small cell lung cancer	ebi-a-GCST90002036	CD80 on CD62L+ myeloid DC	MFI	cDC	MR Egger	21.1805	24	0.628055
Small cell lung cancer	ebi-a-GCST90002083	SSC-A on HLA DR+ T cell	Morphological parameter	TBNK	MR Egger	20.1924	20	0.445954
Small cell lung cancer	ebi-a-GCST90002111	HLA DR on CD33dim HLA DR+ CD11b-	MFI	Myeloid cell	MR Egger	12.3772	16	0.717633
IgD on IgD+	Ebi-a-GCST90018875	Lung cancer	MFI	B cell	Inverse variance weighted	6.91851	10	0.733115
IgD on IgD+	Ebi-a-GCST90018875	Lung cancer	MFI	B cell	MR Egger	4.49175	9	0.876177
CCR2 on CD14+ CD16- monocyte	Finn-b-C3_LUNG_NONSMALL	Non-small cell lung cancer	MFI	Monocyte	Inverse variance weighted	5.86241	8	0.662641
CCR2 on CD14+ CD16- monocyte	Finn-b-C3_LUNG_NONSMALL	Non-small cell lung cancer	MFI	Monocyte	MR Egger	4.99858	7	0.660137

## Sheet: 工作表3
outcome	exposure.id	exposure	Trait type	Panel	method	Q	Q_df	Q_pval
Lung cancer	ebi-a-GCST90001398	Unsw mem AC	Absolute count	B cell	Inverse variance weighted	15.777	21	0.782046
Lung cancer	ebi-a-GCST90001428	IgD- CD38dim %B cell	Relative count	B cell	Inverse variance weighted	21.0455	25	0.690068
Lung cancer	ebi-a-GCST90001447	IgD+ CD38br %B cell	Relative count	B cell	Inverse variance weighted	24.8705	26	0.526315
Lung cancer	ebi-a-GCST90001496	CD39+ secreting Treg %secreting Treg	Relative count	Treg	Inverse variance weighted	16.8593	27	0.934534
Lung cancer	ebi-a-GCST90001497	CD39+ secreting Treg %CD4 Treg	Relative count	Treg	Inverse variance weighted	8.82366	21	0.990535
Lung cancer	ebi-a-GCST90001504	CD25hi AC	Absolute count	Treg	Inverse variance weighted	17.8032	22	0.717593
Lung cancer	ebi-a-GCST90001542	EM CD4+ AC	Absolute count	Maturation stages of T cell	Inverse variance weighted	22.0984	22	0.454026
Lung cancer	ebi-a-GCST90001592	CD8br AC	Absolute count	TBNK	Inverse variance weighted	23.4662	22	0.37582
Lung cancer	ebi-a-GCST90001604	T cell %lymphocyte	Relative count	TBNK	Inverse variance weighted	9.50599	16	0.891123
Lung cancer	ebi-a-GCST90001626	HLA DR+ CD4+ %lymphocyte	Relative count	TBNK	Inverse variance weighted	19.2538	21	0.568865
Lung cancer	ebi-a-GCST90001694	CD28- DN (CD4-CD8-) %T cell	Relative count	Treg	Inverse variance weighted	22.8434	24	0.529056
Lung cancer	ebi-a-GCST90001714	BAFF-R on IgD- CD38dim	MFI	B cell	Inverse variance weighted	2.17497	3	0.536896
Lung cancer	ebi-a-GCST90001715	BAFF-R on memory B cell	MFI	B cell	Inverse variance weighted	15.9542	17	0.527082
Lung cancer	ebi-a-GCST90001743	CD20 on B cell	MFI	B cell	Inverse variance weighted	25.5971	25	0.429342
Lung cancer	ebi-a-GCST90001755	CD20 on IgD- CD38-	MFI	B cell	Inverse variance weighted	49.4313	28	0.00747978
Lung cancer	ebi-a-GCST90001761	CD20 on sw mem	MFI	B cell	Inverse variance weighted	52.7856	31	0.00866145
Lung cancer	ebi-a-GCST90001761 after adjusted	CD20 on sw mem	MFI	B cell	Inverse variance weighted	42.0321	30	0.0711222
Lung cancer	ebi-a-GCST90001827	IgD on IgD+	MFI	B cell	Inverse variance weighted	37.9888	21	0.0129275
Lung cancer	ebi-a-GCST90001827 after adjusted	IgD on IgD+	MFI	B cell	Inverse variance weighted	37.7967	20	0.00937584
Lung cancer	ebi-a-GCST90001861	CD3 on CD28+ CD4+	MFI	Treg	Inverse variance weighted	18.5629	24	0.774879
Lung cancer	ebi-a-GCST90001870	CD34 on HSC	MFI	Myeloid cell	Inverse variance weighted	20.6057	13	0.0811016
Lung cancer	ebi-a-GCST90001902	CD28 on activated Treg	MFI	Treg	Inverse variance weighted	11.1023	17	0.851199
Lung cancer	ebi-a-GCST90001913	CD45 on granulocyte	MFI	TBNK	Inverse variance weighted	23.8552	15	0.0675929
Lung cancer	ebi-a-GCST90001961	CD25 on CD39+ CD4+	MFI	Treg	Inverse variance weighted	25.7335	22	0.263299
Lung cancer	ebi-a-GCST90002043	CD45 on CD33br HLA DR+ CD14dim	MFI	Myeloid cell	Inverse variance weighted	15.6484	15	0.405794
Lung cancer	ebi-a-GCST90002051	CD45 on basophil	MFI	Myeloid cell	Inverse variance weighted	17.0338	18	0.520782
Lung cancer	ebi-a-GCST90002059	CD8 on NKT	MFI	TBNK	Inverse variance weighted	29.2662	18	0.0452209
Lung cancer	ebi-a-GCST90002065	CD4 on CD39+ resting Treg	MFI	Treg	Inverse variance weighted	7.04614	14	0.932919
Lung cancer	ebi-a-GCST90002071	SSC-A on myeloid DC	Morphological parameter	cDC	Inverse variance weighted	20.574	18	0.301447
Lung cancer	ebi-a-GCST90001398	Unsw mem AC	Absolute count	B cell	MR Egger	15.6545	20	0.737813
Lung cancer	ebi-a-GCST90001428	IgD- CD38dim %B cell	Relative count	B cell	MR Egger	20.9773	24	0.640061
Lung cancer	ebi-a-GCST90001447	IgD+ CD38br %B cell	Relative count	B cell	MR Egger	22.2869	25	0.619128
Lung cancer	ebi-a-GCST90001496	CD39+ secreting Treg %secreting Treg	Relative count	Treg	MR Egger	16.5758	26	0.921339
Lung cancer	ebi-a-GCST90001497	CD39+ secreting Treg %CD4 Treg	Relative count	Treg	MR Egger	8.75958	20	0.985528
Lung cancer	ebi-a-GCST90001504	CD25hi AC	Absolute count	Treg	MR Egger	17.7483	21	0.664872
Lung cancer	ebi-a-GCST90001542	EM CD4+ AC	Absolute count	Maturation stages of T cell	MR Egger	21.2351	21	0.444668
Lung cancer	ebi-a-GCST90001592	CD8br AC	Absolute count	TBNK	MR Egger	21.2324	21	0.444832
Lung cancer	ebi-a-GCST90001604	T cell %lymphocyte	Relative count	TBNK	MR Egger	9.50015	15	0.84995
Lung cancer	ebi-a-GCST90001626	HLA DR+ CD4+ %lymphocyte	Relative count	TBNK	MR Egger	18.4759	20	0.55609
Lung cancer	ebi-a-GCST90001694	CD28- DN (CD4-CD8-) %T cell	Relative count	Treg	MR Egger	22.8065	23	0.472118
Lung cancer	ebi-a-GCST90001714	BAFF-R on IgD- CD38dim	MFI	B cell	MR Egger	1.92695	2	0.381565
Lung cancer	ebi-a-GCST90001715	BAFF-R on memory B cell	MFI	B cell	MR Egger	15.6816	16	0.475398
Lung cancer	ebi-a-GCST90001743	CD20 on B cell	MFI	B cell	MR Egger	24.5202	24	0.432197
Lung cancer	ebi-a-GCST90001755	CD20 on IgD- CD38-	MFI	B cell	MR Egger	44.453	27	0.0185566
Lung cancer	ebi-a-GCST90001761	CD20 on sw mem	MFI	B cell	MR Egger	52.2309	30	0.00719157
Lung cancer	ebi-a-GCST90001761 after adjusted	CD20 on sw mem	MFI	B cell	MR Egger	40.4458	29	0.0769074
Lung cancer	ebi-a-GCST90001827	IgD on IgD+	MFI	B cell	MR Egger	33.4343	20	0.0302157
Lung cancer	ebi-a-GCST90001827 after adjusted	IgD on IgD+	MFI	B cell	MR Egger	33.4075	19	0.0215633
Lung cancer	ebi-a-GCST90001861	CD3 on CD28+ CD4+	MFI	Treg	MR Egger	17.5539	23	0.781215
Lung cancer	ebi-a-GCST90001870	CD34 on HSC	MFI	Myeloid cell	MR Egger	19.7928	12	0.0711083
Lung cancer	ebi-a-GCST90001902	CD28 on activated Treg	MFI	Treg	MR Egger	11.0236	16	0.808025
Lung cancer	ebi-a-GCST90001913	CD45 on granulocyte	MFI	TBNK	MR Egger	23.4091	14	0.0539302
Lung cancer	ebi-a-GCST90001961	CD25 on CD39+ CD4+	MFI	Treg	MR Egger	24.131	21	0.286756
Lung cancer	ebi-a-GCST90002043	CD45 on CD33br HLA DR+ CD14dim	MFI	Myeloid cell	MR Egger	15.6314	14	0.336401
Lung cancer	ebi-a-GCST90002051	CD45 on basophil	MFI	Myeloid cell	MR Egger	14.3459	17	0.642483
Lung cancer	ebi-a-GCST90002059	CD8 on NKT	MFI	TBNK	MR Egger	27.9428	17	0.045611
Lung cancer	ebi-a-GCST90002065	CD4 on CD39+ resting Treg	MFI	Treg	MR Egger	6.82645	13	0.910872
Lung cancer	ebi-a-GCST90002071	SSC-A on myeloid DC	Morphological parameter	cDC	MR Egger	19.8849	17	0.280159
Non-Small cell lung cancer	ebi-a-GCST90001399	IgD- CD27- %B cell	Relative count	B cell	Inverse variance weighted	18.2377	15	0.250373
Non-Small cell lung cancer	ebi-a-GCST90001400	IgD+ AC	Absolute count	B cell	Inverse variance weighted	20.3964	13	0.0857576
Non-Small cell lung cancer	ebi-a-GCST90001462	CD62L- DC AC	Absolute count	cDC	Inverse variance weighted	18.6695	18	0.412434
Non-Small cell lung cancer	ebi-a-GCST90001468	CD62L- myeloid DC AC	Absolute count	cDC	Inverse variance weighted	14.8905	16	0.53267
Non-Small cell lung cancer	ebi-a-GCST90001484	CD39+ resting Treg %resting Treg	Relative count	Treg	Inverse variance weighted	21.2787	25	0.676968
Non-Small cell lung cancer	ebi-a-GCST90001630	CD8br NKT AC	Absolute count	TBNK	Inverse variance weighted	24.4054	25	0.496058
Non-Small cell lung cancer	ebi-a-GCST90001649	HLA DR+ NK %NK	Relative count	TBNK	Inverse variance weighted	17.5922	23	0.779218
Non-Small cell lung cancer	ebi-a-GCST90001650	HLA DR+ NK %CD3- lymphocyte	Relative count	TBNK	Inverse variance weighted	13.784	22	0.908969
Non-Small cell lung cancer	ebi-a-GCST90001657	CD28+ DN (CD4-CD8-) AC	Absolute count	Treg	Inverse variance weighted	8.4842	10	0.581651
Non-Small cell lung cancer	ebi-a-GCST90001673	CD28- CD127- CD25++ CD8br %T cell	Relative count	Treg	Inverse variance weighted	11.6391	19	0.900466
Non-Small cell lung cancer	ebi-a-GCST90001702	BAFF-R on CD24+ CD27+	MFI	B cell	Inverse variance weighted	15.2389	18	0.645503
Non-Small cell lung cancer	ebi-a-GCST90001703	BAFF-R on IgD+ CD24+	MFI	B cell	Inverse variance weighted	19.6397	17	0.293072
Non-Small cell lung cancer	ebi-a-GCST90001704	BAFF-R on IgD+ CD24-	MFI	B cell	Inverse variance weighted	21.6113	21	0.4222
Non-Small cell lung cancer	ebi-a-GCST90001705	BAFF-R on IgD+ CD38-	MFI	B cell	Inverse variance weighted	25.4247	21	0.22924
Non-Small cell lung cancer	ebi-a-GCST90001706	BAFF-R on IgD+ CD38- naive	MFI	B cell	Inverse variance weighted	33.1867	26	0.15675
Non-Small cell lung cancer	ebi-a-GCST90001709	BAFF-R on IgD+ CD38dim	MFI	B cell	Inverse variance weighted	28.2963	24	0.247741
Non-Small cell lung cancer	ebi-a-GCST90001711	BAFF-R on IgD- CD27-	MFI	B cell	Inverse variance weighted	10.4211	17	0.885029
Non-Small cell lung cancer	ebi-a-GCST90001712	BAFF-R on IgD- CD38-	MFI	B cell	Inverse variance weighted	9.07797	16	0.910168
Non-Small cell lung cancer	ebi-a-GCST90001715	BAFF-R on memory B cell	MFI	B cell	Inverse variance weighted	11.977	16	0.745564
Non-Small cell lung cancer	ebi-a-GCST90001716	BAFF-R on naive-mature B cell	MFI	B cell	Inverse variance weighted	22.9066	22	0.407018
Non-Small cell lung cancer	ebi-a-GCST90001717	BAFF-R on unsw mem	MFI	B cell	Inverse variance weighted	18.5755	23	0.725569
Non-Small cell lung cancer	ebi-a-GCST90001718	BAFF-R on sw mem	MFI	B cell	Inverse variance weighted	12.9494	18	0.794572
Non-Small cell lung cancer	ebi-a-GCST90001719	BAFF-R on IgD+	MFI	B cell	Inverse variance weighted	26.3348	23	0.285318
Non-Small cell lung cancer	ebi-a-GCST90001720	BAFF-R on transitional	MFI	B cell	Inverse variance weighted	20.6449	24	0.659575
Non-Small cell lung cancer	ebi-a-GCST90001744	CD20 on CD20- CD38-	MFI	B cell	Inverse variance weighted	14.8147	15	0.464847
Non-Small cell lung cancer	ebi-a-GCST90001754	CD20 on IgD- CD27-	MFI	B cell	Inverse variance weighted	19.5446	17	0.298184
Non-Small cell lung cancer	ebi-a-GCST90001755	CD20 on IgD- CD38-	MFI	B cell	Inverse variance weighted	28.2157	28	0.453063
Non-Small cell lung cancer	ebi-a-GCST90001786	CD25 on IgD- CD27-	MFI	B cell	Inverse variance weighted	16.5243	20	0.683609
Non-Small cell lung cancer	ebi-a-GCST90001829	BAFF-R on B cell	MFI	B cell	Inverse variance weighted	22.0569	20	0.337432
Non-Small cell lung cancer	ebi-a-GCST90001838	CD3 on naive CD8br	MFI	Maturation stages of T cell	Inverse variance weighted	22.2355	24	0.565212
Non-Small cell lung cancer	ebi-a-GCST90001842	CD3 on Naive CD4+	MFI	Maturation stages of T cell	Inverse variance weighted	15.5753	27	0.960566
Non-Small cell lung cancer	ebi-a-GCST90001861	CD3 on CD28+ CD4+	MFI	Treg	Inverse variance weighted	19.9093	24	0.70192
Non-Small cell lung cancer	ebi-a-GCST90001890	CD28 on CD45RA+ CD4+	MFI	Treg	Inverse variance weighted	7.02693	12	0.855829
Non-Small cell lung cancer	ebi-a-GCST90001901	CD28 on CD39+ resting Treg	MFI	Treg	Inverse variance weighted	17.2818	19	0.570782
Non-Small cell lung cancer	ebi-a-GCST90001903	CD86 on myeloid DC	MFI	cDC	Inverse variance weighted	11.3167	18	0.880439
Non-Small cell lung cancer	ebi-a-GCST90001920	CD45 on HLA DR+ CD4+	MFI	TBNK	Inverse variance weighted	7.41968	16	0.964299
Non-Small cell lung cancer	ebi-a-GCST90001999	PDL-1 on CD14- CD16+ monocyte	MFI	Monocyte	Inverse variance weighted	12.3555	19	0.869871
Non-Small cell lung cancer	ebi-a-GCST90002001	CD64 on CD14- CD16-	MFI	Monocyte	Inverse variance weighted	12.7392	14	0.547152
Non-Small cell lung cancer	ebi-a-GCST90002004	CCR2 on CD14+ CD16- monocyte	MFI	Monocyte	Inverse variance weighted	25.3594	25	0.442381
Non-Small cell lung cancer	ebi-a-GCST90002015	CCR2 on plasmacytoid DC	MFI	cDC	Inverse variance weighted	16.4645	18	0.560166
Non-Small cell lung cancer	ebi-a-GCST90002016	CCR2 on CD62L+ plasmacytoid DC	MFI	cDC	Inverse variance weighted	22.4964	18	0.210689
Non-Small cell lung cancer	ebi-a-GCST90002034	CD39 on monocyte	MFI	Treg	Inverse variance weighted	16.2675	21	0.754438
Non-Small cell lung cancer	ebi-a-GCST90002086	SSC-A on HLA DR+ CD8br	Morphological parameter	TBNK	Inverse variance weighted	21.492	23	0.551071
Non-Small cell lung cancer	ebi-a-GCST90002095	CD11b on CD33dim HLA DR-	MFI	Myeloid cell	Inverse variance weighted	20.3207	21	0.501038
Non-Small cell lung cancer	ebi-a-GCST90002106	HLA DR on DC	MFI	cDC	Inverse variance weighted	14.2386	18	0.713411
Non-Small cell lung cancer	ebi-a-GCST90001399	IgD- CD27- %B cell	Relative count	B cell	MR Egger	15.8862	14	0.320372
Non-Small cell lung cancer	ebi-a-GCST90001400	IgD+ AC	Absolute count	B cell	MR Egger	17.1955	12	0.142391
Non-Small cell lung cancer	ebi-a-GCST90001462	CD62L- DC AC	Absolute count	cDC	MR Egger	16.6566	17	0.477855
Non-Small cell lung cancer	ebi-a-GCST90001468	CD62L- myeloid DC AC	Absolute count	cDC	MR Egger	14.5479	15	0.484444
Non-Small cell lung cancer	ebi-a-GCST90001484	CD39+ resting Treg %resting Treg	Relative count	Treg	MR Egger	21.0173	24	0.637703
Non-Small cell lung cancer	ebi-a-GCST90001630	CD8br NKT AC	Absolute count	TBNK	MR Egger	24.3475	24	0.441876
Non-Small cell lung cancer	ebi-a-GCST90001649	HLA DR+ NK %NK	Relative count	TBNK	MR Egger	17.592	22	0.729888
Non-Small cell lung cancer	ebi-a-GCST90001650	HLA DR+ NK %CD3- lymphocyte	Relative count	TBNK	MR Egger	13.1173	21	0.904459
Non-Small cell lung cancer	ebi-a-GCST90001657	CD28+ DN (CD4-CD8-) AC	Absolute count	Treg	MR Egger	6.36489	9	0.702916
Non-Small cell lung cancer	ebi-a-GCST90001673	CD28- CD127- CD25++ CD8br %T cell	Relative count	Treg	MR Egger	11.6375	18	0.865379
Non-Small cell lung cancer	ebi-a-GCST90001702	BAFF-R on CD24+ CD27+	MFI	B cell	MR Egger	13.4428	17	0.706075
Non-Small cell lung cancer	ebi-a-GCST90001703	BAFF-R on IgD+ CD24+	MFI	B cell	MR Egger	18.7	16	0.284528
Non-Small cell lung cancer	ebi-a-GCST90001704	BAFF-R on IgD+ CD24-	MFI	B cell	MR Egger	18.5798	20	0.549272
Non-Small cell lung cancer	ebi-a-GCST90001705	BAFF-R on IgD+ CD38-	MFI	B cell	MR Egger	20.0766	20	0.453146
Non-Small cell lung cancer	ebi-a-GCST90001706	BAFF-R on IgD+ CD38- naive	MFI	B cell	MR Egger	32.0523	25	0.156503
Non-Small cell lung cancer	ebi-a-GCST90001709	BAFF-R on IgD+ CD38dim	MFI	B cell	MR Egger	23.3459	23	0.44073
Non-Small cell lung cancer	ebi-a-GCST90001711	BAFF-R on IgD- CD27-	MFI	B cell	MR Egger	8.55639	16	0.930553
Non-Small cell lung cancer	ebi-a-GCST90001712	BAFF-R on IgD- CD38-	MFI	B cell	MR Egger	9.06767	15	0.873953
Non-Small cell lung cancer	ebi-a-GCST90001715	BAFF-R on memory B cell	MFI	B cell	MR Egger	11.2562	15	0.734234
Non-Small cell lung cancer	ebi-a-GCST90001716	BAFF-R on naive-mature B cell	MFI	B cell	MR Egger	20.255	21	0.505167
Non-Small cell lung cancer	ebi-a-GCST90001717	BAFF-R on unsw mem	MFI	B cell	MR Egger	16.164	22	0.807665
Non-Small cell lung cancer	ebi-a-GCST90001718	BAFF-R on sw mem	MFI	B cell	MR Egger	10.8121	17	0.866164
Non-Small cell lung cancer	ebi-a-GCST90001719	BAFF-R on IgD+	MFI	B cell	MR Egger	19.4121	22	0.619764
Non-Small cell lung cancer	ebi-a-GCST90001720	BAFF-R on transitional	MFI	B cell	MR Egger	20.5451	23	0.608845
Non-Small cell lung cancer	ebi-a-GCST90001744	CD20 on CD20- CD38-	MFI	B cell	MR Egger	14.5261	14	0.411296
Non-Small cell lung cancer	ebi-a-GCST90001754	CD20 on IgD- CD27-	MFI	B cell	MR Egger	16.013	16	0.452052
Non-Small cell lung cancer	ebi-a-GCST90001755	CD20 on IgD- CD38-	MFI	B cell	MR Egger	27.3551	27	0.444768
Non-Small cell lung cancer	ebi-a-GCST90001786	CD25 on IgD- CD27-	MFI	B cell	MR Egger	15.8637	19	0.666349
Non-Small cell lung cancer	ebi-a-GCST90001829	BAFF-R on B cell	MFI	B cell	MR Egger	19.7812	19	0.407848
Non-Small cell lung cancer	ebi-a-GCST90001838	CD3 on naive CD8br	MFI	Maturation stages of T cell	MR Egger	17.5825	23	0.779723
Non-Small cell lung cancer	ebi-a-GCST90001842	CD3 on Naive CD4+	MFI	Maturation stages of T cell	MR Egger	15.2755	26	0.952084
Non-Small cell lung cancer	ebi-a-GCST90001861	CD3 on CD28+ CD4+	MFI	Treg	MR Egger	18.4451	23	0.732919
Non-Small cell lung cancer	ebi-a-GCST90001890	CD28 on CD45RA+ CD4+	MFI	Treg	MR Egger	6.96791	11	0.801676
Non-Small cell lung cancer	ebi-a-GCST90001901	CD28 on CD39+ resting Treg	MFI	Treg	MR Egger	17.2764	18	0.504182
Non-Small cell lung cancer	ebi-a-GCST90001903	CD86 on myeloid DC	MFI	cDC	MR Egger	10.5307	17	0.879897
Non-Small cell lung cancer	ebi-a-GCST90001920	CD45 on HLA DR+ CD4+	MFI	TBNK	MR Egger	6.93098	15	0.959537
Non-Small cell lung cancer	ebi-a-GCST90001999	PDL-1 on CD14- CD16+ monocyte	MFI	Monocyte	MR Egger	11.3341	18	0.879647
Non-Small cell lung cancer	ebi-a-GCST90002001	CD64 on CD14- CD16-	MFI	Monocyte	MR Egger	12.7387	13	0.468188
Non-Small cell lung cancer	ebi-a-GCST90002004	CCR2 on CD14+ CD16- monocyte	MFI	Monocyte	MR Egger	24.801	24	0.416636
Non-Small cell lung cancer	ebi-a-GCST90002015	CCR2 on plasmacytoid DC	MFI	cDC	MR Egger	15.8122	17	0.537183
Non-Small cell lung cancer	ebi-a-GCST90002016	CCR2 on CD62L+ plasmacytoid DC	MFI	cDC	MR Egger	21.8212	17	0.191692
Non-Small cell lung cancer	ebi-a-GCST90002034	CD39 on monocyte	MFI	Treg	MR Egger	14.4631	20	0.806261
Non-Small cell lung cancer	ebi-a-GCST90002086	SSC-A on HLA DR+ CD8br	Morphological parameter	TBNK	MR Egger	18.8489	22	0.654642
Non-Small cell lung cancer	ebi-a-GCST90002095	CD11b on CD33dim HLA DR-	MFI	Myeloid cell	MR Egger	19.5456	20	0.486658
Non-Small cell lung cancer	ebi-a-GCST90002106	HLA DR on DC	MFI	cDC	MR Egger	14.1441	17	0.656873
Small cell lung cancer	ebi-a-GCST90001404	PB/PC %B cell	Relative count	B cell	Inverse variance weighted	27.8062	26	0.368058
Small cell lung cancer	ebi-a-GCST90001433	IgD- CD27- %lymphocyte	Relative count	B cell	Inverse variance weighted	15.6547	15	0.405364
Small cell lung cancer	ebi-a-GCST90001440	IgD- CD24- %lymphocyte	Relative count	B cell	Inverse variance weighted	17.5206	23	0.78295
Small cell lung cancer	ebi-a-GCST90001466	CD86+ plasmacytoid DC AC	Absolute count	cDC	Inverse variance weighted	17.2526	19	0.572759
Small cell lung cancer	ebi-a-GCST90001470	CD62L- plasmacytoid DC AC	MFI	cDC	Inverse variance weighted	16.6502	23	0.826058
Small cell lung cancer	ebi-a-GCST90001492	Secreting Treg AC	Absolute count	Treg	Inverse variance weighted	23.2814	21	0.329159
Small cell lung cancer	ebi-a-GCST90001494	Secreting Treg %CD4	Relative count	Treg	Inverse variance weighted	27.289	24	0.291161
Small cell lung cancer	ebi-a-GCST90001501	Activated & secreting Treg AC	Absolute count	Treg	Inverse variance weighted	20.6664	20	0.416997
Small cell lung cancer	ebi-a-GCST90001679	CD25++ CD8br %T cell	Relative count	Treg	Inverse variance weighted	11.0243	16	0.807981
Small cell lung cancer	ebi-a-GCST90001680	CD25++ CD8br %CD8br	Relative count	Treg	Inverse variance weighted	18.4326	21	0.621486
Small cell lung cancer	ebi-a-GCST90001729	CD19 on IgD+ CD38br	MFI	B cell	Inverse variance weighted	11.5939	21	0.949937
Small cell lung cancer	ebi-a-GCST90001740	CD19 on sw mem	MFI	B cell	Inverse variance weighted	31.6966	27	0.243509
Small cell lung cancer	ebi-a-GCST90001753	CD20 on IgD- CD24-	MFI	B cell	Inverse variance weighted	25.3323	25	0.44388
Small cell lung cancer	ebi-a-GCST90001787	CD25 on IgD- CD38-	MFI	B cell	Inverse variance weighted	14.6066	21	0.842162
Small cell lung cancer	ebi-a-GCST90001814	CD38 on IgD- CD38br	MFI	B cell	Inverse variance weighted	7.54843	12	0.819349
Small cell lung cancer	ebi-a-GCST90001827	IgD on IgD+	MFI	B cell	Inverse variance weighted	19.4621	20	0.491996
Small cell lung cancer	ebi-a-GCST90001861	CD3 on CD28+ CD4+	MFI	Treg	Inverse variance weighted	31.2203	24	0.147532
Small cell lung cancer	ebi-a-GCST90001905	CD86 on monocyte	MFI	cDC	Inverse variance weighted	23.6278	15	0.0716895
Small cell lung cancer	ebi-a-GCST90001921	CD45 on HLA DR+ CD8br	MFI	TBNK	Inverse variance weighted	16.0424	18	0.589589
Small cell lung cancer	ebi-a-GCST90001925	CD127 on CD28+ DN (CD4-CD8-)	MFI	Treg	Inverse variance weighted	17.6936	21	0.6683
Small cell lung cancer	ebi-a-GCST90001939	CD25 on activated Treg	MFI	Treg	Inverse variance weighted	11.4778	16	0.779075
Small cell lung cancer	ebi-a-GCST90001967	FSC-A on CD14+ monocyte	Morphological parameter	TBNK	Inverse variance weighted	15.823	23	0.862741
Small cell lung cancer	ebi-a-GCST90001992	CCR2 on CD14+ CD16+ monocyte	MFI	Monocyte	Inverse variance weighted	25.6384	36	0.900128
Small cell lung cancer	ebi-a-GCST90002036	CD80 on CD62L+ myeloid DC	MFI	cDC	Inverse variance weighted	21.251	25	0.678536
Small cell lung cancer	ebi-a-GCST90002083	SSC-A on HLA DR+ T cell	Morphological parameter	TBNK	Inverse variance weighted	20.7135	21	0.476559
Small cell lung cancer	ebi-a-GCST90002111	HLA DR on CD33dim HLA DR+ CD11b-	MFI	Myeloid cell	Inverse variance weighted	13.9497	17	0.670657
Small cell lung cancer	ebi-a-GCST90001404	PB/PC %B cell	Relative count	B cell	MR Egger	27.7614	25	0.318955
Small cell lung cancer	ebi-a-GCST90001433	IgD- CD27- %lymphocyte	Relative count	B cell	MR Egger	12.8949	14	0.534814
Small cell lung cancer	ebi-a-GCST90001440	IgD- CD24- %lymphocyte	Relative count	B cell	MR Egger	15.872	22	0.822188
Small cell lung cancer	ebi-a-GCST90001466	CD86+ plasmacytoid DC AC	Absolute count	cDC	MR Egger	17.2214	18	0.507936
Small cell lung cancer	ebi-a-GCST90001470	CD62L- plasmacytoid DC AC	MFI	cDC	MR Egger	16.6439	22	0.782697
Small cell lung cancer	ebi-a-GCST90001492	Secreting Treg AC	Absolute count	Treg	MR Egger	22.4948	20	0.314276
Small cell lung cancer	ebi-a-GCST90001494	Secreting Treg %CD4	Relative count	Treg	MR Egger	27.1525	23	0.249531
Small cell lung cancer	ebi-a-GCST90001501	Activated & secreting Treg AC	Absolute count	Treg	MR Egger	18.0229	19	0.520911
Small cell lung cancer	ebi-a-GCST90001679	CD25++ CD8br %T cell	Relative count	Treg	MR Egger	10.6898	15	0.774261
Small cell lung cancer	ebi-a-GCST90001680	CD25++ CD8br %CD8br	Relative count	Treg	MR Egger	18.2393	20	0.571647
Small cell lung cancer	ebi-a-GCST90001729	CD19 on IgD+ CD38br	MFI	B cell	MR Egger	10.3522	20	0.961327
Small cell lung cancer	ebi-a-GCST90001740	CD19 on sw mem	MFI	B cell	MR Egger	31.0029	26	0.228163
Small cell lung cancer	ebi-a-GCST90001753	CD20 on IgD- CD24-	MFI	B cell	MR Egger	25.0869	24	0.401052
Small cell lung cancer	ebi-a-GCST90001787	CD25 on IgD- CD38-	MFI	B cell	MR Egger	13.3457	20	0.862065
Small cell lung cancer	ebi-a-GCST90001814	CD38 on IgD- CD38br	MFI	B cell	MR Egger	6.21109	11	0.858915
Small cell lung cancer	ebi-a-GCST90001827	IgD on IgD+	MFI	B cell	MR Egger	19.3097	19	0.437136
Small cell lung cancer	ebi-a-GCST90001861	CD3 on CD28+ CD4+	MFI	Treg	MR Egger	29.7749	23	0.155972
Small cell lung cancer	ebi-a-GCST90001905	CD86 on monocyte	MFI	cDC	MR Egger	20.3473	14	0.119567
Small cell lung cancer	ebi-a-GCST90001921	CD45 on HLA DR+ CD8br	MFI	TBNK	MR Egger	15.4165	17	0.565506
Small cell lung cancer	ebi-a-GCST90001925	CD127 on CD28+ DN (CD4-CD8-)	MFI	Treg	MR Egger	17.0783	20	0.647886
Small cell lung cancer	ebi-a-GCST90001939	CD25 on activated Treg	MFI	Treg	MR Egger	9.41114	15	0.855059
Small cell lung cancer	ebi-a-GCST90001967	FSC-A on CD14+ monocyte	Morphological parameter	TBNK	MR Egger	15.0873	22	0.858464
Small cell lung cancer	ebi-a-GCST90001992	CCR2 on CD14+ CD16+ monocyte	MFI	Monocyte	MR Egger	24.979	35	0.895106
Small cell lung cancer	ebi-a-GCST90002036	CD80 on CD62L+ myeloid DC	MFI	cDC	MR Egger	21.1805	24	0.628055
Small cell lung cancer	ebi-a-GCST90002083	SSC-A on HLA DR+ T cell	Morphological parameter	TBNK	MR Egger	20.1924	20	0.445954
Small cell lung cancer	ebi-a-GCST90002111	HLA DR on CD33dim HLA DR+ CD11b-	MFI	Myeloid cell	MR Egger	12.3772	16	0.717633
IgD on IgD+	Ebi-a-GCST90018875	Lung cancer	MFI	B cell	Inverse variance weighted	6.91851	10	0.733115
IgD on IgD+	Ebi-a-GCST90018875	Lung cancer	MFI	B cell	MR Egger	4.49175	9	0.876177
CCR2 on CD14+ CD16- monocyte	Finn-b-C3_LUNG_NONSMALL	Non-small cell lung cancer	MFI	Monocyte	Inverse variance weighted	5.86241	8	0.662641
CCR2 on CD14+ CD16- monocyte	Finn-b-C3_LUNG_NONSMALL	Non-small cell lung cancer	MFI	Monocyte	MR Egger	4.99858	7	0.660137
