# Supplementary material for: The causal role of immune cells on lung cancer: a bi-directional Mendelian randomization (MR) study
Source: Aging (Albany NY). 2024 Jun 12;16(11):10063–73. doi: 10.18632/aging.205917 (PMC11210237; doi:10.18632/aging.205917)
Supplement: Supplementary Table 2 [file aging-16-205917-s002.xlsx]

## Sheet: 工作表1
Supplementary Table 2. The pleiotropy test was assessed by MR-Egger intercept test and MR-PRESSO method.
outcome	exposure.id	exposure	Trait type	Panel	egger_intercept	se	Pvalue	MR-PRESSO.Pvalue
Lung cancer	ebi-a-GCST90001398	Unsw mem AC	Absolute count	B cell	0.00364553	0.0104155	0.72999	0.816
Lung cancer	ebi-a-GCST90001428	IgD- CD38dim %B cell	Relative count	B cell	0.00200082	0.00766201	0.796217	0.741
Lung cancer	ebi-a-GCST90001447	IgD+ CD38br %B cell	Relative count	B cell	-0.0201906	0.0125614	0.120534	0.536
Lung cancer	ebi-a-GCST90001496	CD39+ secreting Treg %secreting Treg	Relative count	Treg	-0.00413261	0.00776122	0.598923	0.956
Lung cancer	ebi-a-GCST90001497	CD39+ secreting Treg %CD4 Treg	Relative count	Treg	0.00236833	0.0093561	0.80275	0.997
Lung cancer	ebi-a-GCST90001504	CD25hi AC	Absolute count	Treg	-0.00236552	0.0101001	0.817092	0.808
Lung cancer	ebi-a-GCST90001542	EM CD4+ AC	Absolute count	Maturation stages of T cell	0.00956785	0.0103549	0.365985	0.471
Lung cancer	ebi-a-GCST90001592	CD8br AC	Absolute count	TBNK	0.00955191	0.0064263	0.15204	0.403
Lung cancer	ebi-a-GCST90001604	T cell %lymphocyte	Relative count	TBNK	0.00148276	0.0193992	0.940084	0.892
Lung cancer	ebi-a-GCST90001626	HLA DR+ CD4+ %lymphocyte	Relative count	TBNK	-0.00868074	0.00984247	0.388271	0.544
Lung cancer	ebi-a-GCST90001694	CD28- DN (CD4-CD8-) %T cell	Relative count	Treg	0.0019872	0.0103358	0.849223	0.57
Lung cancer	ebi-a-GCST90001714	BAFF-R on IgD- CD38dim	MFI	B cell	0.00739114	0.0148412	0.667844	0.584
Lung cancer	ebi-a-GCST90001715	BAFF-R on memory B cell	MFI	B cell	0.00551849	0.010568	0.608694	0.595
Lung cancer	ebi-a-GCST90001743	CD20 on B cell	MFI	B cell	-0.00631765	0.00615343	0.314805	0.527
Lung cancer	ebi-a-GCST90001755	CD20 on IgD- CD38-	MFI	B cell	-0.0272409	0.0156658	0.093448	0.051
Lung cancer	ebi-a-GCST90001761	CD20 on sw mem	MFI	B cell	0.00797782	0.0141333	0.576632	0.015
Lung cancer	ebi-a-GCST90001761 after adjusted	CD20 on sw mem	MFI	B cell	0.0136501	0.0127993	0.295008	0.077
Lung cancer	ebi-a-GCST90001827	IgD on IgD+	MFI	B cell	0.0259089	0.0156967	0.114439	0.015
Lung cancer	ebi-a-GCST90001827 after adjusted	IgD on IgD+	MFI	B cell	0.0256496	0.0162344	0.130621	0.14
Lung cancer	ebi-a-GCST90001861	CD3 on CD28+ CD4+	MFI	Treg	-0.0115253	0.0114738	0.325595	0.791
Lung cancer	ebi-a-GCST90001870	CD34 on HSC	MFI	Myeloid cell	-0.00840952	0.0119786	0.496042	0.238
Lung cancer	ebi-a-GCST90001902	CD28 on activated Treg	MFI	Treg	0.00263232	0.00938697	0.782747	0.843
Lung cancer	ebi-a-GCST90001913	CD45 on granulocyte	MFI	TBNK	0.00477773	0.00924932	0.613534	0.318
Lung cancer	ebi-a-GCST90001961	CD25 on CD39+ CD4+	MFI	Treg	-0.012104	0.0102495	0.250829	0.392
Lung cancer	ebi-a-GCST90002043	CD45 on CD33br HLA DR+ CD14dim	MFI	Myeloid cell	0.000940203	0.00760447	0.903359	0.51
Lung cancer	ebi-a-GCST90002051	CD45 on basophil	MFI	Myeloid cell	0.0259957	0.0158561	0.119486	0.577
Lung cancer	ebi-a-GCST90002059	CD8 on NKT	MFI	TBNK	0.010148	0.0113095	0.382089	0.086
Lung cancer	ebi-a-GCST90002065	CD4 on CD39+ resting Treg	MFI	Treg	0.00561126	0.0119718	0.647041	0.934
Lung cancer	ebi-a-GCST90002071	SSC-A on myeloid DC	Morphological parameter	cDC	0.00588927	0.00767282	0.453284	0.428
Non-small cell lung cancer	ebi-a-GCST90001399	IgD- CD27- %B cell	Relative count	B cell	0.0365404	0.0253832	0.171978	0.278
Non-small cell lung cancer	ebi-a-GCST90001400	IgD+ AC	Absolute count	B cell	-0.0294302	0.0196912	0.160847	0.253
Non-small cell lung cancer	ebi-a-GCST90001462	CD62L- DC AC	Absolute count	cDC	-0.026099	0.0183955	0.17404	0.412
Non-small cell lung cancer	ebi-a-GCST90001468	CD62L- myeloid DC AC	Absolute count	cDC	-0.0145101	0.0247893	0.567024	0.613
Non-small cell lung cancer	ebi-a-GCST90001484	CD39+ resting Treg %resting Treg	Relative count	Treg	-0.00876236	0.0171376	0.613816	0.729
Non-small cell lung cancer	ebi-a-GCST90001630	CD8br NKT AC	Absolute count	TBNK	0.00454114	0.0190053	0.81318	0.522
Non-small cell lung cancer	ebi-a-GCST90001649	HLA DR+ NK %NK	Relative count	TBNK	0.000274664	0.0183594	0.988199	0.785
Non-small cell lung cancer	ebi-a-GCST90001650	HLA DR+ NK %CD3- lymphocyte	Relative count	TBNK	-0.015468	0.0189447	0.423389	0.921
Non-small cell lung cancer	ebi-a-GCST90001657	CD28+ DN (CD4-CD8-) AC	Absolute count	Treg	-0.0457965	0.0314582	0.17943	0.57
Non-small cell lung cancer	ebi-a-GCST90001673	CD28- CD127- CD25++ CD8br %T cell	Relative count	Treg	0.00067584	0.0165594	0.967894	0.935
Non-small cell lung cancer	ebi-a-GCST90001702	BAFF-R on CD24+ CD27+	MFI	B cell	0.0259915	0.019394	0.197824	0.722
Non-small cell lung cancer	ebi-a-GCST90001703	BAFF-R on IgD+ CD24+	MFI	B cell	0.01868	0.0208323	0.383183	0.346
Non-small cell lung cancer	ebi-a-GCST90001704	BAFF-R on IgD+ CD24-	MFI	B cell	0.0284945	0.0163656	0.0970259	0.446
Non-small cell lung cancer	ebi-a-GCST90001705	BAFF-R on IgD+ CD38-	MFI	B cell	0.0360226	0.0156066	0.0318039	0.288
Non-small cell lung cancer	ebi-a-GCST90001706	BAFF-R on IgD+ CD38- naive	MFI	B cell	-0.0189933	0.0201923	0.3559	0.201
Non-small cell lung cancer	ebi-a-GCST90001709	BAFF-R on IgD+ CD38dim	MFI	B cell	0.0365999	0.016573	0.0374558	0.269
Non-small cell lung cancer	ebi-a-GCST90001711	BAFF-R on IgD- CD27-	MFI	B cell	0.0266021	0.0194809	0.190973	0.904
Non-small cell lung cancer	ebi-a-GCST90001712	BAFF-R on IgD- CD38-	MFI	B cell	-0.00217944	0.0214744	0.920506	0.912
Non-small cell lung cancer	ebi-a-GCST90001715	BAFF-R on memory B cell	MFI	B cell	0.0177211	0.0208727	0.409224	0.764
Non-small cell lung cancer	ebi-a-GCST90001716	BAFF-R on naive-mature B cell	MFI	B cell	0.0298052	0.0183034	0.118352	0.484
Non-small cell lung cancer	ebi-a-GCST90001717	BAFF-R on unsw mem	MFI	B cell	0.0260573	0.0167797	0.134713	0.762
Non-small cell lung cancer	ebi-a-GCST90001718	BAFF-R on sw mem	MFI	B cell	0.0322415	0.0220539	0.161996	0.838
Non-small cell lung cancer	ebi-a-GCST90001719	BAFF-R on IgD+	MFI	B cell	0.0427256	0.0162387	0.0152551	0.331
Non-small cell lung cancer	ebi-a-GCST90001720	BAFF-R on transitional	MFI	B cell	0.00536813	0.0169934	0.754932	0.682
Non-small cell lung cancer	ebi-a-GCST90001744	CD20 on CD20- CD38-	MFI	B cell	-0.0110298	0.0209145	0.60619	0.57
Non-small cell lung cancer	ebi-a-GCST90001754	CD20 on IgD- CD27-	MFI	B cell	-0.0661488	0.0352141	0.0786623	0.306
Non-small cell lung cancer	ebi-a-GCST90001755	CD20 on IgD- CD38-	MFI	B cell	-0.0181367	0.0196786	0.364878	0.476
Non-small cell lung cancer	ebi-a-GCST90001786	CD25 on IgD- CD27-	MFI	B cell	-0.0185907	0.0228735	0.426421	0.684
Non-small cell lung cancer	ebi-a-GCST90001829	BAFF-R on B cell	MFI	B cell	0.0281803	0.0190609	0.155679	0.392
Non-small cell lung cancer	ebi-a-GCST90001838	CD3 on naive CD8br	MFI	Maturation stages of T cell	-0.0390278	0.0180929	0.0416885	0.621
Non-small cell lung cancer	ebi-a-GCST90001842	CD3 on Naive CD4+	MFI	Maturation stages of T cell	-0.00786882	0.014373	0.588724	0.956
Non-small cell lung cancer	ebi-a-GCST90001861	CD3 on CD28+ CD4+	MFI	Treg	-0.0267293	0.0220893	0.238546	0.66
Non-small cell lung cancer	ebi-a-GCST90001890	CD28 on CD45RA+ CD4+	MFI	Treg	0.00699558	0.0287948	0.812518	0.837
Non-small cell lung cancer	ebi-a-GCST90001901	CD28 on CD39+ resting Treg	MFI	Treg	-0.00124073	0.0169216	0.942358	0.649
Non-small cell lung cancer	ebi-a-GCST90001903	CD86 on myeloid DC	MFI	cDC	0.0210302	0.023721	0.387684	0.88
Non-small cell lung cancer	ebi-a-GCST90001920	CD45 on HLA DR+ CD4+	MFI	TBNK	-0.0115441	0.0165136	0.49521	0.978
Non-small cell lung cancer	ebi-a-GCST90001999	PDL-1 on CD14- CD16+ monocyte	MFI	Monocyte	0.0255675	0.0252972	0.325561	0.851
Non-small cell lung cancer	ebi-a-GCST90002001	CD64 on CD14- CD16-	MFI	Monocyte	-0.000623492	0.0283127	0.982765	0.555
Non-small cell lung cancer	ebi-a-GCST90002004	CCR2 on CD14+ CD16- monocyte	MFI	Monocyte	0.00939886	0.0127859	0.469405	0.47
Non-small cell lung cancer	ebi-a-GCST90002015	CCR2 on plasmacytoid DC	MFI	cDC	-0.0133674	0.0165518	0.430469	0.665
Non-small cell lung cancer	ebi-a-GCST90002016	CCR2 on CD62L+ plasmacytoid DC	MFI	cDC	-0.0142101	0.0195929	0.478153	0.334
Non-small cell lung cancer	ebi-a-GCST90002034	CD39 on monocyte	MFI	Treg	0.0211502	0.0157453	0.194228	0.781
Non-small cell lung cancer	ebi-a-GCST90002086	SSC-A on HLA DR+ CD8br	Morphological parameter	TBNK	0.0280168	0.017233	0.11824	0.597
Non-small cell lung cancer	ebi-a-GCST90002095	CD11b on CD33dim HLA DR-	MFI	Myeloid cell	-0.0216502	0.0245915	0.389103	0.465
Non-small cell lung cancer	ebi-a-GCST90002106	HLA DR on DC	MFI	cDC	0.00678674	0.0220837	0.762333	0.807
Small cell lung cancer	ebi-a-GCST90001404	PB/PC %B cell	Relative count	B cell	-0.0103395	0.0514415	0.842328	0.466
Small cell lung cancer	ebi-a-GCST90001433	IgD- CD27- %lymphocyte	Relative count	B cell	-0.165696	0.0997416	0.118882	0.44
Small cell lung cancer	ebi-a-GCST90001440	IgD- CD24- %lymphocyte	Relative count	B cell	0.0669746	0.052162	0.21251	0.785
Small cell lung cancer	ebi-a-GCST90001466	CD86+ plasmacytoid DC AC	Absolute count	cDC	-0.0121181	0.0685902	0.861737	0.597
Small cell lung cancer	ebi-a-GCST90001470	CD62L- plasmacytoid DC AC	MFI	cDC	0.00442	0.0558177	0.9376	0.852
Small cell lung cancer	ebi-a-GCST90001492	Secreting Treg AC	Absolute count	Treg	0.0450564	0.0538762	0.41287	0.34
Small cell lung cancer	ebi-a-GCST90001494	Secreting Treg %CD4	Relative count	Treg	0.0148215	0.043586	0.736904	0.289
Small cell lung cancer	ebi-a-GCST90001501	Activated & secreting Treg AC	Absolute count	Treg	0.0894124	0.0549929	0.120445	0.408
Small cell lung cancer	ebi-a-GCST90001679	CD25++ CD8br %T cell	Relative count	Treg	-0.0435848	0.0753517	0.571564	0.833
Small cell lung cancer	ebi-a-GCST90001680	CD25++ CD8br %CD8br	Relative count	Treg	0.0259311	0.0589778	0.664886	0.672
Small cell lung cancer	ebi-a-GCST90001729	CD19 on IgD+ CD38br	MFI	B cell	0.0460385	0.0413143	0.278343	0.939
Small cell lung cancer	ebi-a-GCST90001740	CD19 on sw mem	MFI	B cell	-0.0506994	0.0664705	0.452486	0.297
Small cell lung cancer	ebi-a-GCST90001753	CD20 on IgD- CD24-	MFI	B cell	0.0224755	0.0463844	0.63239	0.472
Small cell lung cancer	ebi-a-GCST90001787	CD25 on IgD- CD38-	MFI	B cell	0.0513407	0.0457209	0.274773	0.822
Small cell lung cancer	ebi-a-GCST90001814	CD38 on IgD- CD38br	MFI	B cell	-0.0654059	0.0565582	0.272001	0.753
Small cell lung cancer	ebi-a-GCST90001827	IgD on IgD+	MFI	B cell	0.0228972	0.0591267	0.70287	0.484
Small cell lung cancer	ebi-a-GCST90001861	CD3 on CD28+ CD4+	MFI	Treg	0.0790526	0.0748152	0.301649	0.198
Small cell lung cancer	ebi-a-GCST90001905	CD86 on monocyte	MFI	cDC	-0.126738	0.0843578	0.155213	0.094
Small cell lung cancer	ebi-a-GCST90001921	CD45 on HLA DR+ CD8br	MFI	TBNK	-0.0365185	0.0461616	0.439783	0.653
Small cell lung cancer	ebi-a-GCST90001925	CD127 on CD28+ DN (CD4-CD8-)	MFI	Treg	-0.0513091	0.0654062	0.441959	0.676
Small cell lung cancer	ebi-a-GCST90001939	CD25 on activated Treg	MFI	Treg	-0.136552	0.094986	0.17108	0.716
Small cell lung cancer	ebi-a-GCST90001967	FSC-A on CD14+ monocyte	Morphological parameter	TBNK	0.0461161	0.0537664	0.4003	0.889
Small cell lung cancer	ebi-a-GCST90001992	CCR2 on CD14+ CD16+ monocyte	MFI	Monocyte	0.033194	0.0408784	0.422271	0.907
Small cell lung cancer	ebi-a-GCST90002036	CD80 on CD62L+ myeloid DC	MFI	cDC	0.0125295	0.0472058	0.792951	0.712
Small cell lung cancer	ebi-a-GCST90002083	SSC-A on HLA DR+ T cell	Morphological parameter	TBNK	-0.0440314	0.061291	0.48082	0.499
Small cell lung cancer	ebi-a-GCST90002111	HLA DR on CD33dim HLA DR+ CD11b-	MFI	Myeloid cell	0.0844348	0.0673316	0.227849	0.71
IgD on IgD+	Ebi-a-GCST90018875	Lung cancer	MFI	B cell	0.0940503	0.0603737	0.153707	0.742
CCR2 on CD14+ CD16- monocyte	Finn-b-C3_LUNG_NONSMALL	Non-small cell lung cancer	MFI	Monocyte	-0.0300015	0.0322797	0.3836	0.745
