# Supplementary material for: The causal role of immune cells on lung cancer: a bi-directional Mendelian randomization (MR) study
Source: Aging (Albany NY). 2024 Jun 12;16(11):10063–73. doi: 10.18632/aging.205917 (PMC11210237; doi:10.18632/aging.205917)
Supplement: Supplementary Table 3 [file aging-16-205917-s003.xlsx]

## Sheet: Sheet1
Supplementary Table 3. The selected SNPs.
SNP	exposure	id.exposure	R2	F
rs72757888	IgD+ %B cell	ebi-a-GCST90001391	0.00647496	23.8267
rs56209800	IgD+ %B cell	ebi-a-GCST90001391	0.00544378	20.0114
rs7597061	IgD+ %B cell	ebi-a-GCST90001391	0.00533544	19.611
rs138919897	IgD+ %B cell	ebi-a-GCST90001391	0.00594687	21.8718
rs4691917	IgD+ %B cell	ebi-a-GCST90001391	0.00677789	24.9491
rs17405603	IgD+ %B cell	ebi-a-GCST90001391	0.00847917	31.2649
rs72952600	IgD+ %B cell	ebi-a-GCST90001391	0.00597466	21.9747
rs9265870	IgD+ %B cell	ebi-a-GCST90001391	0.00617844	22.7288
rs12204136	IgD+ %B cell	ebi-a-GCST90001391	0.00531947	19.552
rs10226722	IgD+ %B cell	ebi-a-GCST90001391	0.00581363	21.3789
rs2450220	IgD+ %B cell	ebi-a-GCST90001391	0.00625779	23.0226
rs140191306	IgD+ %B cell	ebi-a-GCST90001391	0.0060567	22.2782
rs11068290	IgD+ %B cell	ebi-a-GCST90001391	0.00631504	23.2345
rs11616703	IgD+ %B cell	ebi-a-GCST90001391	0.00538882	19.8083
rs62057183	IgD+ %B cell	ebi-a-GCST90001391	0.00534217	19.6359
rs73426855	IgD+ %B cell	ebi-a-GCST90001391	0.0067802	24.9576
rs148496020	IgD+ %B cell	ebi-a-GCST90001391	0.00570775	20.9873
rs1919856	IgD+ CD38br AC	ebi-a-GCST90001392	0.0053817	19.7711
rs116285595	IgD+ CD38br AC	ebi-a-GCST90001392	0.0057439	21.1095
rs116104104	IgD+ CD38br AC	ebi-a-GCST90001392	0.00563031	20.6896
rs12036556	IgD+ CD38br AC	ebi-a-GCST90001392	0.00600286	22.0669
rs1294253	IgD+ CD38br AC	ebi-a-GCST90001392	0.00734007	27.019
rs146959444	IgD+ CD38br AC	ebi-a-GCST90001392	0.00639902	23.5326
rs113965271	IgD+ CD38br AC	ebi-a-GCST90001392	0.00556604	20.4522
rs733555	IgD+ CD38br AC	ebi-a-GCST90001392	0.00718478	26.4432
rs78188887	IgD+ CD38br AC	ebi-a-GCST90001392	0.00621503	22.8518
rs140380950	IgD+ CD38br AC	ebi-a-GCST90001392	0.00870795	32.0983
rs374727947	IgD+ CD38br AC	ebi-a-GCST90001392	0.00594399	21.8492
rs794185	IgD+ CD38br AC	ebi-a-GCST90001392	0.00537389	19.7423
rs76112278	IgD+ CD38br AC	ebi-a-GCST90001392	0.00768569	28.301
rs7667070	IgD+ CD38br AC	ebi-a-GCST90001392	0.00607353	22.3283
rs80330977	IgD+ CD38br AC	ebi-a-GCST90001392	0.00919677	33.9169
rs78658073	IgD+ CD38br AC	ebi-a-GCST90001392	0.00575307	21.1433
rs76660971	IgD+ CD38br AC	ebi-a-GCST90001392	0.00543454	19.9663
rs117772462	IgD+ CD38br AC	ebi-a-GCST90001392	0.00539807	19.8316
rs10265656	IgD+ CD38br AC	ebi-a-GCST90001392	0.00557604	20.4891
rs143397127	IgD+ CD38br AC	ebi-a-GCST90001392	0.00634269	23.3241
rs1695681	IgD+ CD38br AC	ebi-a-GCST90001392	0.00735617	27.0786
rs16868356	IgD+ CD38br AC	ebi-a-GCST90001392	0.00641734	23.6004
rs2395904	IgD+ CD38br AC	ebi-a-GCST90001392	0.00625589	23.0029
rs10821937	IgD+ CD38br AC	ebi-a-GCST90001392	0.00539306	19.8131
rs61878035	IgD+ CD38br AC	ebi-a-GCST90001392	0.00609759	22.4173
rs11068290	IgD+ CD38br AC	ebi-a-GCST90001392	0.00562813	20.6816
rs118090735	IgD+ CD38br AC	ebi-a-GCST90001392	0.0054259	19.9344
rs11159480	IgD+ CD38br AC	ebi-a-GCST90001392	0.00606812	22.3083
rs7169431	IgD+ CD38br AC	ebi-a-GCST90001392	0.00563832	20.7192
rs76608654	IgD+ CD38br AC	ebi-a-GCST90001392	0.00572887	21.0539
rs12939565	IgD+ CD38br AC	ebi-a-GCST90001392	0.00707726	26.0446
rs75766272	IgD+ CD38dim %B cell	ebi-a-GCST90001393	0.00549791	20.2059
rs7595353	IgD+ CD38dim %B cell	ebi-a-GCST90001393	0.00558961	20.5448
rs9865821	IgD+ CD38dim %B cell	ebi-a-GCST90001393	0.00549637	20.2003
rs6835759	IgD+ CD38dim %B cell	ebi-a-GCST90001393	0.00621625	22.8625
rs2301101	IgD+ CD38dim %B cell	ebi-a-GCST90001393	0.00595863	21.9094
rs9459562	IgD+ CD38dim %B cell	ebi-a-GCST90001393	0.00536919	19.7303
rs6998850	IgD+ CD38dim %B cell	ebi-a-GCST90001393	0.00547648	20.1268
rs546147740	IgD+ CD38dim %B cell	ebi-a-GCST90001393	0.00570964	20.9886
rs62488766	IgD+ CD38dim %B cell	ebi-a-GCST90001393	0.00552284	20.2981
rs61912200	IgD+ CD38dim %B cell	ebi-a-GCST90001393	0.00570334	20.9653
rs78269238	IgD+ CD38dim %B cell	ebi-a-GCST90001393	0.00728497	26.8219
rs60521331	IgD+ CD38dim %B cell	ebi-a-GCST90001393	0.0054935	20.1897
rs34157595	IgD+ CD38dim %B cell	ebi-a-GCST90001393	0.00669425	24.6324
rs329966	IgD+ CD38dim %B cell	ebi-a-GCST90001393	0.00717309	26.4071
rs4811007	IgD+ CD38dim %B cell	ebi-a-GCST90001393	0.00712812	26.2403
rs73909843	IgD+ CD38dim %B cell	ebi-a-GCST90001393	0.00548075	20.1425
rs78958229	IgD+ CD38dim %B cell	ebi-a-GCST90001393	0.00669427	24.6325
rs72691696	IgD+ CD38dim AC	ebi-a-GCST90001394	0.00537711	19.7542
rs7690529	IgD+ CD38dim AC	ebi-a-GCST90001394	0.00546173	20.0668
rs147207149	IgD+ CD38dim AC	ebi-a-GCST90001394	0.00622276	22.8803
rs17056318	IgD+ CD38dim AC	ebi-a-GCST90001394	0.0068496	25.2011
rs1510970	IgD+ CD38dim AC	ebi-a-GCST90001394	0.00586281	21.549
rs115150472	IgD+ CD38dim AC	ebi-a-GCST90001394	0.00534308	19.6285
rs141880653	IgD+ CD38dim AC	ebi-a-GCST90001394	0.00587168	21.5818
rs115951641	IgD+ CD38dim AC	ebi-a-GCST90001394	0.00536239	19.6998
rs12197153	IgD+ CD38dim AC	ebi-a-GCST90001394	0.00679468	24.9976
rs143397127	IgD+ CD38dim AC	ebi-a-GCST90001394	0.0060714	22.3204
rs190448231	IgD+ CD38dim AC	ebi-a-GCST90001394	0.00538334	19.7772
rs2395904	IgD+ CD38dim AC	ebi-a-GCST90001394	0.00594343	21.8472
rs283340	IgD+ CD38dim AC	ebi-a-GCST90001394	0.00646516	23.7774
rs150663332	IgD+ CD38dim AC	ebi-a-GCST90001394	0.00559972	20.5766
rs139801247	IgD+ CD38dim AC	ebi-a-GCST90001394	0.00562248	20.6607
rs116851238	IgD+ CD38dim AC	ebi-a-GCST90001394	0.00626516	23.0372
rs12799241	IgD+ CD38dim AC	ebi-a-GCST90001394	0.0061641	22.6633
rs75474045	IgD+ CD38dim AC	ebi-a-GCST90001394	0.00734282	27.0291
rs12906621	IgD+ CD38dim AC	ebi-a-GCST90001394	0.00580787	21.3459
rs117518951	IgD+ CD38dim AC	ebi-a-GCST90001394	0.00551279	20.2554
rs143176410	IgD+ CD38dim AC	ebi-a-GCST90001394	0.00643578	23.6687
rs8076302	IgD+ CD38dim AC	ebi-a-GCST90001394	0.00558668	20.5284
rs12939566	IgD+ CD38dim AC	ebi-a-GCST90001394	0.00806827	29.7212
rs4792571	IgD+ CD38dim AC	ebi-a-GCST90001394	0.00575005	21.1322
rs655580	IgD+ CD38dim AC	ebi-a-GCST90001394	0.00665682	24.487
rs34764986	IgD+ CD38dim AC	ebi-a-GCST90001394	0.00589555	21.6701
rs12122084	IgD+ CD38- %B cell	ebi-a-GCST90001395	0.005595	20.5648
rs1512044	IgD+ CD38- %B cell	ebi-a-GCST90001395	0.00734959	27.0616
rs76376526	IgD+ CD38- %B cell	ebi-a-GCST90001395	0.00549247	20.1859
rs78009119	IgD+ CD38- %B cell	ebi-a-GCST90001395	0.00580963	21.3583
rs34843244	IgD+ CD38- %B cell	ebi-a-GCST90001395	0.00552198	20.2949
rs115802369	IgD+ CD38- %B cell	ebi-a-GCST90001395	0.00545416	20.0443
rs2621369	IgD+ CD38- %B cell	ebi-a-GCST90001395	0.00612676	22.5314
rs113398446	IgD+ CD38- %B cell	ebi-a-GCST90001395	0.00822395	30.3078
rs80032720	IgD+ CD38- %B cell	ebi-a-GCST90001395	0.00593439	21.8197
rs10254361	IgD+ CD38- %B cell	ebi-a-GCST90001395	0.00574825	21.1313
rs2251199	IgD+ CD38- %B cell	ebi-a-GCST90001395	0.00560759	20.6113
rs62502412	IgD+ CD38- %B cell	ebi-a-GCST90001395	0.00540499	19.8626
rs10111625	IgD+ CD38- %B cell	ebi-a-GCST90001395	0.0054515	20.0345
rs7012048	IgD+ CD38- %B cell	ebi-a-GCST90001395	0.00556568	20.4564
rs148952274	IgD+ CD38- %B cell	ebi-a-GCST90001395	0.00550664	20.2382
rs79870102	IgD+ CD38- %B cell	ebi-a-GCST90001395	0.00552149	20.2931
rs1959342	IgD+ CD38- %B cell	ebi-a-GCST90001395	0.00533446	19.602
rs77762131	IgD+ CD38- %B cell	ebi-a-GCST90001395	0.0094107	34.7229
rs10444793	IgD+ CD38- %B cell	ebi-a-GCST90001395	0.00695974	25.6161
rs147135384	IgD+ CD38- %B cell	ebi-a-GCST90001395	0.00538797	19.7997
rs11150426	IgD+ CD38- %B cell	ebi-a-GCST90001395	0.00621718	22.8659
rs181771926	IgD+ CD38- %B cell	ebi-a-GCST90001395	0.0062401	22.9508
rs329966	IgD+ CD38- %B cell	ebi-a-GCST90001395	0.00705148	25.9562
rs73909843	IgD+ CD38- %B cell	ebi-a-GCST90001395	0.00579949	21.3208
rs35050775	IgD+ CD38- %B cell	ebi-a-GCST90001395	0.00546657	20.0901
rs10493766	IgD+ CD38- AC	ebi-a-GCST90001396	0.00564319	20.7372
rs149701635	IgD+ CD38- AC	ebi-a-GCST90001396	0.00560402	20.5925
rs79207264	IgD+ CD38- AC	ebi-a-GCST90001396	0.00600184	22.0632
rs71615254	IgD+ CD38- AC	ebi-a-GCST90001396	0.00543421	19.9651
rs146127735	IgD+ CD38- AC	ebi-a-GCST90001396	0.00602847	22.1616
rs1158784	IgD+ CD38- AC	ebi-a-GCST90001396	0.00569921	20.9443
rs12216018	IgD+ CD38- AC	ebi-a-GCST90001396	0.0059537	21.8851
rs7809268	IgD+ CD38- AC	ebi-a-GCST90001396	0.00567741	20.8637
rs144625305	IgD+ CD38- AC	ebi-a-GCST90001396	0.00539468	19.8191
rs10866982	IgD+ CD38- AC	ebi-a-GCST90001396	0.00554639	20.3795
rs12763172	IgD+ CD38- AC	ebi-a-GCST90001396	0.0055539	20.4073
rs7909504	IgD+ CD38- AC	ebi-a-GCST90001396	0.00538976	19.8009
rs146687492	IgD+ CD38- AC	ebi-a-GCST90001396	0.00570702	20.9732
rs12874404	IgD+ CD38- AC	ebi-a-GCST90001396	0.00708274	26.065
rs77762131	IgD+ CD38- AC	ebi-a-GCST90001396	0.00838913	30.9132
rs10444793	IgD+ CD38- AC	ebi-a-GCST90001396	0.00538751	19.7926
rs1529727	IgD+ CD38- AC	ebi-a-GCST90001396	0.00591678	21.7486
rs62235484	IgD+ CD38- AC	ebi-a-GCST90001396	0.00660324	24.2886
rs7412746	Unsw mem %B cell	ebi-a-GCST90001397	0.00545163	20.0349
rs146430312	Unsw mem %B cell	ebi-a-GCST90001397	0.00569571	20.9371
rs75766272	Unsw mem %B cell	ebi-a-GCST90001397	0.00698189	25.6982
rs72686460	Unsw mem %B cell	ebi-a-GCST90001397	0.00563344	20.7069
rs77201712	Unsw mem %B cell	ebi-a-GCST90001397	0.00574847	21.1321
rs17006489	Unsw mem %B cell	ebi-a-GCST90001397	0.00568503	20.8976
rs72844588	Unsw mem %B cell	ebi-a-GCST90001397	0.00608479	22.3761
rs45608038	Unsw mem %B cell	ebi-a-GCST90001397	0.00598387	22.0027
rs73041424	Unsw mem %B cell	ebi-a-GCST90001397	0.0054266	19.9424
rs183471524	Unsw mem %B cell	ebi-a-GCST90001397	0.00546855	20.0974
rs116525939	Unsw mem %B cell	ebi-a-GCST90001397	0.00565977	20.8042
rs895377	Unsw mem %B cell	ebi-a-GCST90001397	0.00560604	20.6056
rs73032183	Unsw mem %B cell	ebi-a-GCST90001397	0.00620267	22.8123
rs4710879	Unsw mem %B cell	ebi-a-GCST90001397	0.00615468	22.6347
rs12539793	Unsw mem %B cell	ebi-a-GCST90001397	0.00605421	22.2629
rs11779181	Unsw mem %B cell	ebi-a-GCST90001397	0.0054116	19.887
rs1679013	Unsw mem %B cell	ebi-a-GCST90001397	0.00652318	23.9988
rs1930922	Unsw mem %B cell	ebi-a-GCST90001397	0.00586298	21.5556
rs12380223	Unsw mem %B cell	ebi-a-GCST90001397	0.00561191	20.6273
rs143553941	Unsw mem %B cell	ebi-a-GCST90001397	0.00613184	22.5502
rs11519226	Unsw mem %B cell	ebi-a-GCST90001397	0.00556386	20.4497
rs7322292	Unsw mem %B cell	ebi-a-GCST90001397	0.00601915	22.1332
rs73192651	Unsw mem %B cell	ebi-a-GCST90001397	0.0103202	38.1138
rs2793491	Unsw mem %B cell	ebi-a-GCST90001397	0.00539652	19.8313
rs73518104	Unsw mem %B cell	ebi-a-GCST90001397	0.00547099	20.1065
rs117004076	Unsw mem %B cell	ebi-a-GCST90001397	0.00534809	19.6524
rs77762131	Unsw mem %B cell	ebi-a-GCST90001397	0.00753139	27.7361
rs143666202	Unsw mem %B cell	ebi-a-GCST90001397	0.00617068	22.6939
rs150839591	Unsw mem %B cell	ebi-a-GCST90001397	0.00564663	20.7556
rs1596383	Unsw mem %B cell	ebi-a-GCST90001397	0.00593611	21.8261
rs1883832	Unsw mem %B cell	ebi-a-GCST90001397	0.00577404	21.2267
rs138380722	Unsw mem %B cell	ebi-a-GCST90001397	0.00568848	20.9103
rs146720368	Unsw mem %B cell	ebi-a-GCST90001397	0.00533913	19.6193
rs75766272	Unsw mem AC	ebi-a-GCST90001398	0.00540328	19.8509
rs11737576	Unsw mem AC	ebi-a-GCST90001398	0.00547603	20.1196
rs79831025	Unsw mem AC	ebi-a-GCST90001398	0.0054221	19.9204
rs4076316	Unsw mem AC	ebi-a-GCST90001398	0.00653556	24.038
rs144625305	Unsw mem AC	ebi-a-GCST90001398	0.00539593	19.8237
rs2436878	Unsw mem AC	ebi-a-GCST90001398	0.00555633	20.4163
rs118092259	Unsw mem AC	ebi-a-GCST90001398	0.00579886	21.3126
rs11794578	Unsw mem AC	ebi-a-GCST90001398	0.0056415	20.731
rs112839090	Unsw mem AC	ebi-a-GCST90001398	0.00611197	22.4705
rs12874404	Unsw mem AC	ebi-a-GCST90001398	0.00902768	33.2877
rs557577736	Unsw mem AC	ebi-a-GCST90001398	0.00678813	24.9733
rs145371905	Unsw mem AC	ebi-a-GCST90001398	0.00588227	21.621
rs73192651	Unsw mem AC	ebi-a-GCST90001398	0.00855519	31.5304
rs77762131	Unsw mem AC	ebi-a-GCST90001398	0.00779427	28.704
rs143666202	Unsw mem AC	ebi-a-GCST90001398	0.00600401	22.0712
rs8014978	Unsw mem AC	ebi-a-GCST90001398	0.00673171	24.7644
rs880311	Unsw mem AC	ebi-a-GCST90001398	0.00553532	20.3386
rs11657118	Unsw mem AC	ebi-a-GCST90001398	0.00578005	21.2431
rs12461001	Unsw mem AC	ebi-a-GCST90001398	0.0059641	21.9236
rs7254039	Unsw mem AC	ebi-a-GCST90001398	0.00547668	20.122
rs6032660	Unsw mem AC	ebi-a-GCST90001398	0.0070442	25.9221
rs55712190	Unsw mem AC	ebi-a-GCST90001398	0.00561006	20.6148
rs76625665	IgD- CD27- %B cell	ebi-a-GCST90001399	0.0055356	20.3453
rs116473015	IgD- CD27- %B cell	ebi-a-GCST90001399	0.00592393	21.781
rs9842571	IgD- CD27- %B cell	ebi-a-GCST90001399	0.00551118	20.255
rs35574803	IgD- CD27- %B cell	ebi-a-GCST90001399	0.0116477	43.0742
rs79430021	IgD- CD27- %B cell	ebi-a-GCST90001399	0.00582702	21.4226
rs35661323	IgD- CD27- %B cell	ebi-a-GCST90001399	0.00570946	20.9879
rs2250246	IgD- CD27- %B cell	ebi-a-GCST90001399	0.00975872	36.0196
rs7224129	IgD- CD27- %B cell	ebi-a-GCST90001399	0.00601969	22.1352
rs11658240	IgD- CD27- %B cell	ebi-a-GCST90001399	0.00599156	22.0312
rs7209088	IgD- CD27- %B cell	ebi-a-GCST90001399	0.00535269	19.6694
rs72897237	IgD- CD27- %B cell	ebi-a-GCST90001399	0.0062458	22.9719
rs645554	IgD- CD27- %B cell	ebi-a-GCST90001399	0.00562714	20.6836
rs4810485	IgD- CD27- %B cell	ebi-a-GCST90001399	0.0585383	227.261
rs6073079	IgD- CD27- %B cell	ebi-a-GCST90001399	0.00610892	22.4653
rs11086984	IgD- CD27- %B cell	ebi-a-GCST90001399	0.00727614	26.7892
rs62223906	IgD- CD27- %B cell	ebi-a-GCST90001399	0.00541174	19.8875
rs71615254	IgD+ AC	ebi-a-GCST90001400	0.00668248	24.5888
rs12197153	IgD+ AC	ebi-a-GCST90001400	0.00583144	21.4389
rs9354413	IgD+ AC	ebi-a-GCST90001400	0.00575324	21.1498
rs2390504	IgD+ AC	ebi-a-GCST90001400	0.00556841	20.4665
rs146233710	IgD+ AC	ebi-a-GCST90001400	0.00561222	20.6284
rs150663332	IgD+ AC	ebi-a-GCST90001400	0.00759509	27.9725
rs3019260	IgD+ AC	ebi-a-GCST90001400	0.0056698	20.8413
rs701839	IgD+ AC	ebi-a-GCST90001400	0.00600466	22.0796
rs189761842	IgD+ AC	ebi-a-GCST90001400	0.0064507	23.7304
rs116906133	IgD+ AC	ebi-a-GCST90001400	0.00541184	19.8879
rs4145212	IgD+ AC	ebi-a-GCST90001400	0.00750314	27.6313
rs3811215	IgD+ AC	ebi-a-GCST90001400	0.00671448	24.7073
rs11638959	IgD+ AC	ebi-a-GCST90001400	0.00587279	21.5918
rs143176410	IgD+ AC	ebi-a-GCST90001400	0.00560749	20.611
rs11653761	IgD+ AC	ebi-a-GCST90001400	0.00665279	24.4788
rs62067029	IgD+ AC	ebi-a-GCST90001400	0.00929061	34.2756
rs67017503	IgD+ AC	ebi-a-GCST90001400	0.00537301	19.7445
rs12461001	IgD+ AC	ebi-a-GCST90001400	0.00587733	21.6087
rs77110486	IgD+ AC	ebi-a-GCST90001400	0.00543206	19.9626
rs61786059	IgD- CD27- AC	ebi-a-GCST90001401	0.00575148	21.1375
rs7518494	IgD- CD27- AC	ebi-a-GCST90001401	0.00591525	21.743
rs185621536	IgD- CD27- AC	ebi-a-GCST90001401	0.00569478	20.9279
rs12129123	IgD- CD27- AC	ebi-a-GCST90001401	0.00548079	20.1372
rs72953104	IgD- CD27- AC	ebi-a-GCST90001401	0.00577786	21.235
rs113442137	IgD- CD27- AC	ebi-a-GCST90001401	0.00542562	19.9334
rs11688492	IgD- CD27- AC	ebi-a-GCST90001401	0.00640914	23.5701
rs7606024	IgD- CD27- AC	ebi-a-GCST90001401	0.00557547	20.487
rs114551034	IgD- CD27- AC	ebi-a-GCST90001401	0.00650796	23.9358
rs35574803	IgD- CD27- AC	ebi-a-GCST90001401	0.00736069	27.0954
rs13099360	IgD- CD27- AC	ebi-a-GCST90001401	0.00532633	19.5666
rs59951351	IgD- CD27- AC	ebi-a-GCST90001401	0.00541393	19.8902
rs74356874	IgD- CD27- AC	ebi-a-GCST90001401	0.00559526	20.5601
rs144306835	IgD- CD27- AC	ebi-a-GCST90001401	0.00627319	23.0669
rs112432445	IgD- CD27- AC	ebi-a-GCST90001401	0.0068134	25.0669
rs78763642	IgD- CD27- AC	ebi-a-GCST90001401	0.0053624	19.6999
rs117493606	IgD- CD27- AC	ebi-a-GCST90001401	0.00557159	20.4727
rs117833074	IgD- CD27- AC	ebi-a-GCST90001401	0.00539712	19.8281
rs1047792	IgD- CD27- AC	ebi-a-GCST90001401	0.00554549	20.3762
rs2250246	IgD- CD27- AC	ebi-a-GCST90001401	0.00833891	30.7266
rs11843493	IgD- CD27- AC	ebi-a-GCST90001401	0.00543111	19.9536
rs421516	IgD- CD27- AC	ebi-a-GCST90001401	0.00580533	21.3366
rs11661511	IgD- CD27- AC	ebi-a-GCST90001401	0.00567394	20.8509
rs72977632	IgD- CD27- AC	ebi-a-GCST90001401	0.00565333	20.7747
rs406298	IgD- CD27- AC	ebi-a-GCST90001401	0.0058836	21.6259
rs77126700	IgD- CD27- AC	ebi-a-GCST90001401	0.00617403	22.7001
rs4239702	IgD- CD27- AC	ebi-a-GCST90001401	0.0317907	119.977
rs909692	IgD- CD27- AC	ebi-a-GCST90001401	0.00535569	19.6751
rs9615714	IgD- CD27- AC	ebi-a-GCST90001401	0.00671445	24.7004
rs72757888	Sw mem %B cell	ebi-a-GCST90001402	0.00607117	22.3257
rs11204752	Sw mem %B cell	ebi-a-GCST90001402	0.00585959	21.543
rs1519529	Sw mem %B cell	ebi-a-GCST90001402	0.005499	20.21
rs138919897	Sw mem %B cell	ebi-a-GCST90001402	0.00540784	19.8731
rs55658041	Sw mem %B cell	ebi-a-GCST90001402	0.00623128	22.9181
rs17405603	Sw mem %B cell	ebi-a-GCST90001402	0.00694995	25.5798
rs830682	Sw mem %B cell	ebi-a-GCST90001402	0.00551749	20.2783
rs9265880	Sw mem %B cell	ebi-a-GCST90001402	0.00647754	23.8298
rs2450220	Sw mem %B cell	ebi-a-GCST90001402	0.00610232	22.4409
rs140191306	Sw mem %B cell	ebi-a-GCST90001402	0.00646772	23.7934
rs2105800	Sw mem %B cell	ebi-a-GCST90001402	0.00558036	20.5107
rs11068290	Sw mem %B cell	ebi-a-GCST90001402	0.00668659	24.604
rs114917376	Sw mem %B cell	ebi-a-GCST90001402	0.00583382	21.4478
rs73426855	Sw mem %B cell	ebi-a-GCST90001402	0.00684347	25.1853
rs142587763	Sw mem AC	ebi-a-GCST90001403	0.00563157	20.6943
rs115414430	Sw mem AC	ebi-a-GCST90001403	0.00611442	22.4796
rs1519526	Sw mem AC	ebi-a-GCST90001403	0.00636624	23.4113
rs7595246	Sw mem AC	ebi-a-GCST90001403	0.00594521	21.8537
rs73185679	Sw mem AC	ebi-a-GCST90001403	0.00553223	20.3272
rs141352577	Sw mem AC	ebi-a-GCST90001403	0.00559777	20.5694
rs115218350	Sw mem AC	ebi-a-GCST90001403	0.00572492	21.0393
rs80076964	Sw mem AC	ebi-a-GCST90001403	0.00618965	22.7579
rs4697617	Sw mem AC	ebi-a-GCST90001403	0.00550156	20.2139
rs452973	Sw mem AC	ebi-a-GCST90001403	0.00534969	19.6529
rs4076316	Sw mem AC	ebi-a-GCST90001403	0.00573164	21.0642
rs1161387	Sw mem AC	ebi-a-GCST90001403	0.00538949	19.7999
rs60508745	Sw mem AC	ebi-a-GCST90001403	0.0058831	21.6241
rs11777835	Sw mem AC	ebi-a-GCST90001403	0.00672135	24.726
rs62521107	Sw mem AC	ebi-a-GCST90001403	0.00612597	22.5223
rs2454536	Sw mem AC	ebi-a-GCST90001403	0.00650736	23.9336
rs192544457	Sw mem AC	ebi-a-GCST90001403	0.00664825	24.4553
rs73178168	Sw mem AC	ebi-a-GCST90001403	0.00622286	22.8807
rs9520836	Sw mem AC	ebi-a-GCST90001403	0.00788725	29.0491
rs11653761	Sw mem AC	ebi-a-GCST90001403	0.00721875	26.5691
rs421516	Sw mem AC	ebi-a-GCST90001403	0.00594326	21.8465
rs117605782	Sw mem AC	ebi-a-GCST90001403	0.00549106	20.1751
rs149462070	Sw mem AC	ebi-a-GCST90001403	0.00568207	20.8809
rs77741094	Sw mem AC	ebi-a-GCST90001403	0.00657717	24.1921
rs5994482	Sw mem AC	ebi-a-GCST90001403	0.00554416	20.3713
rs187723151	PB/PC %B cell	ebi-a-GCST90001404	0.00603719	22.206
rs2792563	PB/PC %B cell	ebi-a-GCST90001404	0.00713037	26.2559
rs150152228	PB/PC %B cell	ebi-a-GCST90001404	0.00558428	20.5308
rs79423067	PB/PC %B cell	ebi-a-GCST90001404	0.00574568	21.1276
rs78804535	PB/PC %B cell	ebi-a-GCST90001404	0.00587243	21.5964
rs140642786	PB/PC %B cell	ebi-a-GCST90001404	0.00571023	20.9965
rs2019885	PB/PC %B cell	ebi-a-GCST90001404	0.00592092	21.7758
rs193552	PB/PC %B cell	ebi-a-GCST90001404	0.00558943	20.5498
rs34629	PB/PC %B cell	ebi-a-GCST90001404	0.00637952	23.4733
rs61294310	PB/PC %B cell	ebi-a-GCST90001404	0.00569861	20.9535
rs11754551	PB/PC %B cell	ebi-a-GCST90001404	0.00539729	19.8396
rs78370279	PB/PC %B cell	ebi-a-GCST90001404	0.00586252	21.5598
rs74326785	PB/PC %B cell	ebi-a-GCST90001404	0.00571368	21.0092
rs138542577	PB/PC %B cell	ebi-a-GCST90001404	0.0082512	30.4174
rs4458909	PB/PC %B cell	ebi-a-GCST90001404	0.00592871	21.8046
rs3138500	PB/PC %B cell	ebi-a-GCST90001404	0.00554545	20.3872
rs12412378	PB/PC %B cell	ebi-a-GCST90001404	0.00702843	25.8778
rs185836310	PB/PC %B cell	ebi-a-GCST90001404	0.00576969	21.2164
rs76195952	PB/PC %B cell	ebi-a-GCST90001404	0.0055683	20.4717
rs55728331	PB/PC %B cell	ebi-a-GCST90001404	0.00665953	24.5105
rs10849436	PB/PC %B cell	ebi-a-GCST90001404	0.0059432	21.8582
rs62012610	PB/PC %B cell	ebi-a-GCST90001404	0.00573435	21.0857
rs8191161	PB/PC %B cell	ebi-a-GCST90001404	0.0056395	20.7349
rs12709039	PB/PC %B cell	ebi-a-GCST90001404	0.006934	25.5277
rs80148662	PB/PC %B cell	ebi-a-GCST90001404	0.00547288	20.1189
rs186329	PB/PC %B cell	ebi-a-GCST90001404	0.00621027	22.8466
rs8132059	PB/PC %B cell	ebi-a-GCST90001404	0.00544923	20.0315
rs11089305	PB/PC %B cell	ebi-a-GCST90001404	0.00674282	24.8191
rs80297308	PB/PC AC	ebi-a-GCST90001405	0.00618515	22.7474
rs10800645	PB/PC AC	ebi-a-GCST90001405	0.00559011	20.5467
rs74458303	PB/PC AC	ebi-a-GCST90001405	0.00596823	21.9448
rs148362575	PB/PC AC	ebi-a-GCST90001405	0.00594684	21.8657
rs148389014	PB/PC AC	ebi-a-GCST90001405	0.00550827	20.2442
rs116540222	PB/PC AC	ebi-a-GCST90001405	0.00561558	20.6409
rs149048155	PB/PC AC	ebi-a-GCST90001405	0.0054762	20.1257
rs62353585	PB/PC AC	ebi-a-GCST90001405	0.00586439	21.5608
rs76709581	PB/PC AC	ebi-a-GCST90001405	0.0057867	21.2735
rs7449190	PB/PC AC	ebi-a-GCST90001405	0.00549754	20.2046
rs61294310	PB/PC AC	ebi-a-GCST90001405	0.00624002	22.9505
rs4506076	PB/PC AC	ebi-a-GCST90001405	0.00540081	19.8472
rs149559870	PB/PC AC	ebi-a-GCST90001405	0.00563877	20.7266
rs74565954	PB/PC AC	ebi-a-GCST90001405	0.00613866	22.5754
rs62519719	PB/PC AC	ebi-a-GCST90001405	0.00599141	22.0306
rs12412378	PB/PC AC	ebi-a-GCST90001405	0.006698	24.6463
rs1681588	PB/PC AC	ebi-a-GCST90001405	0.00553569	20.3456
rs17765677	PB/PC AC	ebi-a-GCST90001405	0.00636715	23.4211
rs7185719	PB/PC AC	ebi-a-GCST90001405	0.00553863	20.3565
rs112471525	PB/PC AC	ebi-a-GCST90001405	0.00546737	20.0931
rs72883992	PB/PC AC	ebi-a-GCST90001405	0.00538474	19.7878
rs4806937	PB/PC AC	ebi-a-GCST90001405	0.00545318	20.0407
rs6014246	PB/PC AC	ebi-a-GCST90001405	0.00575847	21.1691
rs4820558	PB/PC AC	ebi-a-GCST90001405	0.00643596	23.6758
rs28652751	PB/PC AC	ebi-a-GCST90001405	0.00538598	19.7924
rs75766272	Memory B cell %B cell	ebi-a-GCST90001406	0.00794823	29.2835
rs4658141	Memory B cell %B cell	ebi-a-GCST90001406	0.00743496	27.3783
rs149876490	Memory B cell %B cell	ebi-a-GCST90001406	0.00544183	19.9987
rs7412746	Memory B cell %B cell	ebi-a-GCST90001406	0.00799459	29.4557
rs72635970	Memory B cell %B cell	ebi-a-GCST90001406	0.00926225	34.17
rs116391651	Memory B cell %B cell	ebi-a-GCST90001406	0.00533803	19.6152
rs72844588	Memory B cell %B cell	ebi-a-GCST90001406	0.00692172	25.4752
rs55710170	Memory B cell %B cell	ebi-a-GCST90001406	0.0057846	21.2657
rs60515154	Memory B cell %B cell	ebi-a-GCST90001406	0.00556473	20.4529
rs35698683	Memory B cell %B cell	ebi-a-GCST90001406	0.00593262	21.8131
rs77312528	Memory B cell %B cell	ebi-a-GCST90001406	0.00668922	24.6137
rs895377	Memory B cell %B cell	ebi-a-GCST90001406	0.00733459	27.006
rs690488	Memory B cell %B cell	ebi-a-GCST90001406	0.00606116	22.2886
rs115405874	Memory B cell %B cell	ebi-a-GCST90001406	0.00659826	24.2768
rs62398379	Memory B cell %B cell	ebi-a-GCST90001406	0.00638956	23.504
rs9270558	Memory B cell %B cell	ebi-a-GCST90001406	0.00570292	20.9637
rs9492229	Memory B cell %B cell	ebi-a-GCST90001406	0.00719569	26.4909
rs633090	Memory B cell %B cell	ebi-a-GCST90001406	0.00544123	19.9965
rs140191306	Memory B cell %B cell	ebi-a-GCST90001406	0.00537698	19.7591
rs145123647	Memory B cell %B cell	ebi-a-GCST90001406	0.0063173	23.2365
rs10750504	Memory B cell %B cell	ebi-a-GCST90001406	0.00551363	20.264
rs61896866	Memory B cell %B cell	ebi-a-GCST90001406	0.00552805	20.3174
rs112570989	Memory B cell %B cell	ebi-a-GCST90001406	0.00584522	21.4899
rs9584780	Memory B cell %B cell	ebi-a-GCST90001406	0.00623111	22.9175
rs76477280	Memory B cell %B cell	ebi-a-GCST90001406	0.00645249	23.737
rs116844769	Memory B cell %B cell	ebi-a-GCST90001406	0.00851455	31.3879
rs77762131	Memory B cell %B cell	ebi-a-GCST90001406	0.00599578	22.0468
rs72914692	Memory B cell %B cell	ebi-a-GCST90001406	0.00554963	20.3971
rs329966	Memory B cell %B cell	ebi-a-GCST90001406	0.005394	19.822
rs16867231	Memory B cell AC	ebi-a-GCST90001407	0.00587937	21.6103
rs10018308	Memory B cell AC	ebi-a-GCST90001407	0.00543589	19.9713
rs17708396	Memory B cell AC	ebi-a-GCST90001407	0.00625456	22.998
rs12216018	Memory B cell AC	ebi-a-GCST90001407	0.00564813	20.7555
rs74565175	Memory B cell AC	ebi-a-GCST90001407	0.0054892	20.1682
rs77643931	Memory B cell AC	ebi-a-GCST90001407	0.00538063	19.7672
rs12763172	Memory B cell AC	ebi-a-GCST90001407	0.00556666	20.4544
rs2879633	Memory B cell AC	ebi-a-GCST90001407	0.00597612	21.968
rs36072728	Memory B cell AC	ebi-a-GCST90001407	0.00560624	20.6007
rs557577736	Memory B cell AC	ebi-a-GCST90001407	0.00600734	22.0835
rs12874404	Memory B cell AC	ebi-a-GCST90001407	0.0114289	42.244
rs61997631	Memory B cell AC	ebi-a-GCST90001407	0.00636561	23.4089
rs77762131	Memory B cell AC	ebi-a-GCST90001407	0.00595924	21.9056
rs139196765	Memory B cell AC	ebi-a-GCST90001407	0.00619035	22.7604
rs11653761	Memory B cell AC	ebi-a-GCST90001407	0.00596837	21.9394
rs144295598	Memory B cell AC	ebi-a-GCST90001407	0.00694222	25.5442
rs9614226	Memory B cell AC	ebi-a-GCST90001407	0.00642049	23.6121
rs4658141	Naive-mature B cell %B cell	ebi-a-GCST90001408	0.00760388	28.0051
rs7412746	Naive-mature B cell %B cell	ebi-a-GCST90001408	0.00720352	26.5199
rs75766272	Naive-mature B cell %B cell	ebi-a-GCST90001408	0.00775568	28.5686
rs149876490	Naive-mature B cell %B cell	ebi-a-GCST90001408	0.00555741	20.4258
rs72844588	Naive-mature B cell %B cell	ebi-a-GCST90001408	0.00660685	24.3086
rs13421263	Naive-mature B cell %B cell	ebi-a-GCST90001408	0.00585263	21.5173
rs72635970	Naive-mature B cell %B cell	ebi-a-GCST90001408	0.00836153	30.8191
rs55710170	Naive-mature B cell %B cell	ebi-a-GCST90001408	0.00533442	19.6019
rs35698683	Naive-mature B cell %B cell	ebi-a-GCST90001408	0.00557367	20.486
rs77312528	Naive-mature B cell %B cell	ebi-a-GCST90001408	0.0062538	23.0015
rs115405874	Naive-mature B cell %B cell	ebi-a-GCST90001408	0.00685685	25.2348
rs690488	Naive-mature B cell %B cell	ebi-a-GCST90001408	0.00580344	21.3354
rs895377	Naive-mature B cell %B cell	ebi-a-GCST90001408	0.00691993	25.4686
rs62398379	Naive-mature B cell %B cell	ebi-a-GCST90001408	0.00632454	23.2633
rs9492229	Naive-mature B cell %B cell	ebi-a-GCST90001408	0.0065991	24.28
rs9270578	Naive-mature B cell %B cell	ebi-a-GCST90001408	0.0055176	20.2787
rs633090	Naive-mature B cell %B cell	ebi-a-GCST90001408	0.00554708	20.3877
rs145123647	Naive-mature B cell %B cell	ebi-a-GCST90001408	0.00624282	22.9608
rs61896866	Naive-mature B cell %B cell	ebi-a-GCST90001408	0.00561491	20.6384
rs2334904	Naive-mature B cell %B cell	ebi-a-GCST90001408	0.00568975	20.9151
rs112570989	Naive-mature B cell %B cell	ebi-a-GCST90001408	0.00611367	22.4829
rs76477280	Naive-mature B cell %B cell	ebi-a-GCST90001408	0.00622535	22.8962
rs9584780	Naive-mature B cell %B cell	ebi-a-GCST90001408	0.00686514	25.2656
rs2476213	Naive-mature B cell %B cell	ebi-a-GCST90001408	0.00535866	19.6914
rs77762131	Naive-mature B cell %B cell	ebi-a-GCST90001408	0.00592965	21.8022
rs974368	Naive-mature B cell %B cell	ebi-a-GCST90001408	0.00579273	21.2958
rs116844769	Naive-mature B cell %B cell	ebi-a-GCST90001408	0.00754811	27.7982
rs72914692	Naive-mature B cell %B cell	ebi-a-GCST90001408	0.00561299	20.6313
rs9614418	Naive-mature B cell %B cell	ebi-a-GCST90001408	0.00555057	20.4006
rs139077655	Naive-mature B cell AC	ebi-a-GCST90001409	0.00575701	21.1579
rs76981518	Naive-mature B cell AC	ebi-a-GCST90001409	0.00558825	20.5342
rs115150472	Naive-mature B cell AC	ebi-a-GCST90001409	0.0055991	20.5743
rs10042327	Naive-mature B cell AC	ebi-a-GCST90001409	0.00547836	20.1282
rs17056318	Naive-mature B cell AC	ebi-a-GCST90001409	0.00727811	26.7892
rs9354413	Naive-mature B cell AC	ebi-a-GCST90001409	0.00548749	20.1619
rs35607968	Naive-mature B cell AC	ebi-a-GCST90001409	0.00583665	21.4523
rs2390504	Naive-mature B cell AC	ebi-a-GCST90001409	0.00586856	21.5703
rs143397127	Naive-mature B cell AC	ebi-a-GCST90001409	0.0059008	21.6895
rs2395904	Naive-mature B cell AC	ebi-a-GCST90001409	0.00743627	27.3757
rs283340	Naive-mature B cell AC	ebi-a-GCST90001409	0.00692846	25.4932
rs189761842	Naive-mature B cell AC	ebi-a-GCST90001409	0.00581369	21.3674
rs117344365	Naive-mature B cell AC	ebi-a-GCST90001409	0.00543101	19.9533
rs12799241	Naive-mature B cell AC	ebi-a-GCST90001409	0.00657689	24.1911
rs2286599	Naive-mature B cell AC	ebi-a-GCST90001409	0.00538092	19.7683
rs58114937	Naive-mature B cell AC	ebi-a-GCST90001409	0.00597718	21.9719
rs9564767	Naive-mature B cell AC	ebi-a-GCST90001409	0.00585188	21.5086
rs3811215	Naive-mature B cell AC	ebi-a-GCST90001409	0.00564776	20.7541
rs76263497	Naive-mature B cell AC	ebi-a-GCST90001409	0.00564983	20.7618
rs143176410	Naive-mature B cell AC	ebi-a-GCST90001409	0.00546581	20.0818
rs77983244	Naive-mature B cell AC	ebi-a-GCST90001409	0.00575793	21.1613
rs62067029	Naive-mature B cell AC	ebi-a-GCST90001409	0.00849339	31.3007
rs62115322	Naive-mature B cell AC	ebi-a-GCST90001409	0.00589541	21.6696
rs34764986	Naive-mature B cell AC	ebi-a-GCST90001409	0.00648348	23.8452
rs2792563	IgD- CD38br %B cell	ebi-a-GCST90001410	0.00873175	32.1957
rs1250061	IgD- CD38br %B cell	ebi-a-GCST90001410	0.00545488	20.0469
rs12636371	IgD- CD38br %B cell	ebi-a-GCST90001410	0.00654613	24.0838
rs12493961	IgD- CD38br %B cell	ebi-a-GCST90001410	0.00619318	22.7771
rs13075403	IgD- CD38br %B cell	ebi-a-GCST90001410	0.00539823	19.8376
rs11938966	IgD- CD38br %B cell	ebi-a-GCST90001410	0.00557811	20.5024
rs76912165	IgD- CD38br %B cell	ebi-a-GCST90001410	0.00591295	21.7404
rs139843122	IgD- CD38br %B cell	ebi-a-GCST90001410	0.00587951	21.6167
rs148377259	IgD- CD38br %B cell	ebi-a-GCST90001410	0.00735437	27.0794
rs13235778	IgD- CD38br %B cell	ebi-a-GCST90001410	0.00563863	20.7261
rs10270812	IgD- CD38br %B cell	ebi-a-GCST90001410	0.00635464	23.3747
rs188550599	IgD- CD38br %B cell	ebi-a-GCST90001410	0.00548202	20.1472
rs138542577	IgD- CD38br %B cell	ebi-a-GCST90001410	0.0070543	25.9666
rs137930158	IgD- CD38br %B cell	ebi-a-GCST90001410	0.00599504	22.044
rs113087021	IgD- CD38br %B cell	ebi-a-GCST90001410	0.00540306	19.8555
rs478251	IgD- CD38br %B cell	ebi-a-GCST90001410	0.00675514	24.858
rs238926	IgD- CD38br %B cell	ebi-a-GCST90001410	0.00574534	21.1206
rs7185719	IgD- CD38br %B cell	ebi-a-GCST90001410	0.00574288	21.1115
rs11705673	IgD- CD38br %B cell	ebi-a-GCST90001410	0.00580842	21.3538
rs75766272	IgD+ CD24+ %B cell	ebi-a-GCST90001411	0.00736789	27.1295
rs11584183	IgD+ CD24+ %B cell	ebi-a-GCST90001411	0.00534057	19.6246
rs45608038	IgD+ CD24+ %B cell	ebi-a-GCST90001411	0.00536098	19.7
rs6781675	IgD+ CD24+ %B cell	ebi-a-GCST90001411	0.00547075	20.1056
rs11134931	IgD+ CD24+ %B cell	ebi-a-GCST90001411	0.00540584	19.8657
rs34418535	IgD+ CD24+ %B cell	ebi-a-GCST90001411	0.00630341	23.1851
rs45575344	IgD+ CD24+ %B cell	ebi-a-GCST90001411	0.00565705	20.7942
rs147867176	IgD+ CD24+ %B cell	ebi-a-GCST90001411	0.00550471	20.2311
rs9369326	IgD+ CD24+ %B cell	ebi-a-GCST90001411	0.00581346	21.3724
rs7457479	IgD+ CD24+ %B cell	ebi-a-GCST90001411	0.00546669	20.0906
rs62562996	IgD+ CD24+ %B cell	ebi-a-GCST90001411	0.00604273	22.2204
rs112570989	IgD+ CD24+ %B cell	ebi-a-GCST90001411	0.00591169	21.7357
rs12874404	IgD+ CD24+ %B cell	ebi-a-GCST90001411	0.00642507	23.6355
rs7988851	IgD+ CD24+ %B cell	ebi-a-GCST90001411	0.00690589	25.4166
rs76477280	IgD+ CD24+ %B cell	ebi-a-GCST90001411	0.00768824	28.3182
rs145371905	IgD+ CD24+ %B cell	ebi-a-GCST90001411	0.00563306	20.7055
rs77762131	IgD+ CD24+ %B cell	ebi-a-GCST90001411	0.00628562	23.1193
rs78269238	IgD+ CD24+ %B cell	ebi-a-GCST90001411	0.00549502	20.1953
rs35130455	IgD+ CD24+ %B cell	ebi-a-GCST90001411	0.00538033	19.7715
rs17256322	IgD+ CD24+ %B cell	ebi-a-GCST90001411	0.00570915	20.9868
rs144479315	IgD+ CD24+ %B cell	ebi-a-GCST90001411	0.00554318	20.3732
rs7586359	IgD+ CD24+ AC	ebi-a-GCST90001412	0.00644106	23.6882
rs10513789	IgD+ CD24+ AC	ebi-a-GCST90001412	0.00547125	20.1019
rs13132141	IgD+ CD24+ AC	ebi-a-GCST90001412	0.00589911	21.6833
rs147556975	IgD+ CD24+ AC	ebi-a-GCST90001412	0.00631038	23.2046
rs4702913	IgD+ CD24+ AC	ebi-a-GCST90001412	0.00593942	21.8323
rs10942726	IgD+ CD24+ AC	ebi-a-GCST90001412	0.00544735	20.0136
rs144607178	IgD+ CD24+ AC	ebi-a-GCST90001412	0.00533857	19.6118
rs10749417	IgD+ CD24+ AC	ebi-a-GCST90001412	0.00554931	20.3903
rs11047113	IgD+ CD24+ AC	ebi-a-GCST90001412	0.00561732	20.6417
rs183466766	IgD+ CD24+ AC	ebi-a-GCST90001412	0.00733429	26.9975
rs139981802	IgD+ CD24+ AC	ebi-a-GCST90001412	0.00686404	25.2545
rs557577736	IgD+ CD24+ AC	ebi-a-GCST90001412	0.00617985	22.7216
rs145371905	IgD+ CD24+ AC	ebi-a-GCST90001412	0.00651289	23.9541
rs9314892	IgD+ CD24+ AC	ebi-a-GCST90001412	0.00581266	21.3636
rs12874404	IgD+ CD24+ AC	ebi-a-GCST90001412	0.0153405	56.9275
rs73192651	IgD+ CD24+ AC	ebi-a-GCST90001412	0.00699726	25.7482
rs8014978	IgD+ CD24+ AC	ebi-a-GCST90001412	0.0058652	21.5579
rs77762131	IgD+ CD24+ AC	ebi-a-GCST90001412	0.0071157	26.1871
rs12595433	IgD+ CD24+ AC	ebi-a-GCST90001412	0.00560865	20.6096
rs880312	IgD+ CD24+ AC	ebi-a-GCST90001412	0.00571904	21.0176
rs11653761	IgD+ CD24+ AC	ebi-a-GCST90001412	0.00719158	26.4684
rs7254039	IgD+ CD24+ AC	ebi-a-GCST90001412	0.00538966	19.8005
rs9614226	IgD+ CD24+ AC	ebi-a-GCST90001412	0.00632309	23.2516
rs111237501	IgD- CD24- %B cell	ebi-a-GCST90001413	0.00598659	22.0128
rs11887461	IgD- CD24- %B cell	ebi-a-GCST90001413	0.00565937	20.8027
rs13020544	IgD- CD24- %B cell	ebi-a-GCST90001413	0.00639158	23.5115
rs145137909	IgD- CD24- %B cell	ebi-a-GCST90001413	0.00647946	23.8369
rs114209430	IgD- CD24- %B cell	ebi-a-GCST90001413	0.00598927	22.0227
rs17044633	IgD- CD24- %B cell	ebi-a-GCST90001413	0.0060992	22.4294
rs183821560	IgD- CD24- %B cell	ebi-a-GCST90001413	0.00610298	22.4434
rs9398107	IgD- CD24- %B cell	ebi-a-GCST90001413	0.00639487	23.5237
rs73045003	IgD- CD24- %B cell	ebi-a-GCST90001413	0.00537317	19.745
rs76377003	IgD- CD24- %B cell	ebi-a-GCST90001413	0.00583133	21.4385
rs112898282	IgD- CD24- %B cell	ebi-a-GCST90001413	0.00595161	21.8834
rs7966251	IgD- CD24- %B cell	ebi-a-GCST90001413	0.00754338	27.7806
rs142305616	IgD- CD24- %B cell	ebi-a-GCST90001413	0.00538775	19.7989
rs7198605	IgD- CD24- %B cell	ebi-a-GCST90001413	0.00564595	20.7531
rs35192093	IgD- CD24- %B cell	ebi-a-GCST90001413	0.00564482	20.749
rs8109503	IgD- CD24- %B cell	ebi-a-GCST90001413	0.00576553	21.1952
rs6073000	IgD- CD24- %B cell	ebi-a-GCST90001413	0.00662732	24.3845
rs115218594	IgD- CD24- %B cell	ebi-a-GCST90001413	0.00543978	19.9912
rs72953104	IgD- CD24- AC	ebi-a-GCST90001414	0.00577392	21.2204
rs111237501	IgD- CD24- AC	ebi-a-GCST90001414	0.00588654	21.6368
rs114114265	IgD- CD24- AC	ebi-a-GCST90001414	0.0056317	20.6948
rs7615875	IgD- CD24- AC	ebi-a-GCST90001414	0.00539144	19.8071
rs76499400	IgD- CD24- AC	ebi-a-GCST90001414	0.00552931	20.3164
rs4697616	IgD- CD24- AC	ebi-a-GCST90001414	0.00586889	21.5715
rs17044633	IgD- CD24- AC	ebi-a-GCST90001414	0.00562336	20.664
rs76225955	IgD- CD24- AC	ebi-a-GCST90001414	0.00539618	19.8246
rs74356874	IgD- CD24- AC	ebi-a-GCST90001414	0.00571472	21.0016
rs145638783	IgD- CD24- AC	ebi-a-GCST90001414	0.00574122	21.0996
rs112898282	IgD- CD24- AC	ebi-a-GCST90001414	0.00556714	20.4562
rs75453701	IgD- CD24- AC	ebi-a-GCST90001414	0.00534984	19.6535
rs7982713	IgD- CD24- AC	ebi-a-GCST90001414	0.00648811	23.8624
rs191543445	IgD- CD24- AC	ebi-a-GCST90001414	0.00578349	21.2558
rs496760	IgD- CD24- AC	ebi-a-GCST90001414	0.00682214	25.0993
rs421516	IgD- CD24- AC	ebi-a-GCST90001414	0.00573467	21.0753
rs72977632	IgD- CD24- AC	ebi-a-GCST90001414	0.00560993	20.6143
rs451367	IgD- CD24- AC	ebi-a-GCST90001414	0.00661052	24.3156
rs11184230	IgD+ CD24- %B cell	ebi-a-GCST90001415	0.00648507	23.8576
rs7412746	IgD+ CD24- %B cell	ebi-a-GCST90001415	0.00647044	23.8035
rs75766272	IgD+ CD24- %B cell	ebi-a-GCST90001415	0.00822961	30.3288
rs45608038	IgD+ CD24- %B cell	ebi-a-GCST90001415	0.00582006	21.3968
rs12465275	IgD+ CD24- %B cell	ebi-a-GCST90001415	0.00538402	19.7851
rs56335940	IgD+ CD24- %B cell	ebi-a-GCST90001415	0.00570302	20.9641
rs1972883	IgD+ CD24- %B cell	ebi-a-GCST90001415	0.00552047	20.2893
rs35698683	IgD+ CD24- %B cell	ebi-a-GCST90001415	0.0056441	20.7463
rs6910508	IgD+ CD24- %B cell	ebi-a-GCST90001415	0.00561714	20.6466
rs533239981	IgD+ CD24- %B cell	ebi-a-GCST90001415	0.00574556	21.1214
rs2450220	IgD+ CD24- %B cell	ebi-a-GCST90001415	0.00539478	19.8249
rs7870388	IgD+ CD24- %B cell	ebi-a-GCST90001415	0.00595425	21.8931
rs140191306	IgD+ CD24- %B cell	ebi-a-GCST90001415	0.00582635	21.4201
rs145123647	IgD+ CD24- %B cell	ebi-a-GCST90001415	0.00545279	20.0392
rs116844769	IgD+ CD24- %B cell	ebi-a-GCST90001415	0.00789597	29.0895
rs182854545	IgD+ CD24- %B cell	ebi-a-GCST90001415	0.00560166	20.5894
rs73426855	IgD+ CD24- %B cell	ebi-a-GCST90001415	0.00578144	21.254
rs2159343	IgD+ CD24- %B cell	ebi-a-GCST90001415	0.00606856	22.316
rs78958229	IgD+ CD24- %B cell	ebi-a-GCST90001415	0.00552518	20.3067
rs58706313	IgD+ CD24- %B cell	ebi-a-GCST90001415	0.00546842	20.097
rs71615254	IgD+ CD24- AC	ebi-a-GCST90001416	0.00642569	23.6313
rs17056318	IgD+ CD24- AC	ebi-a-GCST90001416	0.00580163	21.3229
rs141108367	IgD+ CD24- AC	ebi-a-GCST90001416	0.00565213	20.7703
rs115150472	IgD+ CD24- AC	ebi-a-GCST90001416	0.00561334	20.6269
rs12197153	IgD+ CD24- AC	ebi-a-GCST90001416	0.00602012	22.1308
rs9354413	IgD+ CD24- AC	ebi-a-GCST90001416	0.00694573	25.5572
rs143397127	IgD+ CD24- AC	ebi-a-GCST90001416	0.00554719	20.3825
rs190448231	IgD+ CD24- AC	ebi-a-GCST90001416	0.00540048	19.8405
rs34910780	IgD+ CD24- AC	ebi-a-GCST90001416	0.0059636	21.9217
rs2395904	IgD+ CD24- AC	ebi-a-GCST90001416	0.00640472	23.5537
rs150663332	IgD+ CD24- AC	ebi-a-GCST90001416	0.00568085	20.8764
rs117190494	IgD+ CD24- AC	ebi-a-GCST90001416	0.00705431	25.9596
rs701839	IgD+ CD24- AC	ebi-a-GCST90001416	0.00562275	20.6617
rs189761842	IgD+ CD24- AC	ebi-a-GCST90001416	0.00553124	20.3236
rs12799241	IgD+ CD24- AC	ebi-a-GCST90001416	0.006068	22.3078
rs34771848	IgD+ CD24- AC	ebi-a-GCST90001416	0.00574769	21.1235
rs76578043	IgD+ CD24- AC	ebi-a-GCST90001416	0.00561185	20.6214
rs75474045	IgD+ CD24- AC	ebi-a-GCST90001416	0.00557128	20.4715
rs3811215	IgD+ CD24- AC	ebi-a-GCST90001416	0.00602525	22.1497
rs143176410	IgD+ CD24- AC	ebi-a-GCST90001416	0.00549628	20.1944
rs73426855	IgD+ CD24- AC	ebi-a-GCST90001416	0.005938	21.8271
rs77983244	IgD+ CD24- AC	ebi-a-GCST90001416	0.00566278	20.8096
rs62067029	IgD+ CD24- AC	ebi-a-GCST90001416	0.00843779	31.0941
rs34764986	IgD+ CD24- AC	ebi-a-GCST90001416	0.00553023	20.3198
rs145208372	CD24+ CD27+ %B cell	ebi-a-GCST90001417	0.00559992	20.583
rs7412746	CD24+ CD27+ %B cell	ebi-a-GCST90001417	0.00708409	26.0771
rs72758947	CD24+ CD27+ %B cell	ebi-a-GCST90001417	0.00584361	21.4839
rs4658141	CD24+ CD27+ %B cell	ebi-a-GCST90001417	0.00651165	23.9561
rs75766272	CD24+ CD27+ %B cell	ebi-a-GCST90001417	0.00856389	31.5714
rs72944931	CD24+ CD27+ %B cell	ebi-a-GCST90001417	0.0053301	19.5859
rs45608038	CD24+ CD27+ %B cell	ebi-a-GCST90001417	0.00866043	31.9304
rs72844588	CD24+ CD27+ %B cell	ebi-a-GCST90001417	0.00620956	22.8378
rs62233948	CD24+ CD27+ %B cell	ebi-a-GCST90001417	0.00547207	20.1105
rs145442262	CD24+ CD27+ %B cell	ebi-a-GCST90001417	0.00644717	23.7173
rs55710170	CD24+ CD27+ %B cell	ebi-a-GCST90001417	0.0055287	20.3197
rs35698683	CD24+ CD27+ %B cell	ebi-a-GCST90001417	0.00662927	24.3917
rs115405874	CD24+ CD27+ %B cell	ebi-a-GCST90001417	0.00581072	21.3623
rs681014	CD24+ CD27+ %B cell	ebi-a-GCST90001417	0.00586393	21.5591
rs9492229	CD24+ CD27+ %B cell	ebi-a-GCST90001417	0.00536151	19.7019
rs148702078	CD24+ CD27+ %B cell	ebi-a-GCST90001417	0.00546276	20.0761
rs62459310	CD24+ CD27+ %B cell	ebi-a-GCST90001417	0.00557434	20.4884
rs10505439	CD24+ CD27+ %B cell	ebi-a-GCST90001417	0.00535197	19.6667
rs10743163	CD24+ CD27+ %B cell	ebi-a-GCST90001417	0.00611191	22.4764
rs265612	CD24+ CD27+ %B cell	ebi-a-GCST90001417	0.00535895	19.6925
rs112294465	CD24+ CD27+ %B cell	ebi-a-GCST90001417	0.00547366	20.1163
rs76477280	CD24+ CD27+ %B cell	ebi-a-GCST90001417	0.00835896	30.8095
rs117004076	CD24+ CD27+ %B cell	ebi-a-GCST90001417	0.00539781	19.8361
rs77762131	CD24+ CD27+ %B cell	ebi-a-GCST90001417	0.00572781	21.0558
rs116844769	CD24+ CD27+ %B cell	ebi-a-GCST90001417	0.00649031	23.877
rs7221794	CD24+ CD27+ %B cell	ebi-a-GCST90001417	0.0057624	21.1837
rs75766272	CD24+ CD27+ AC	ebi-a-GCST90001418	0.00603174	22.1737
rs16867231	CD24+ CD27+ AC	ebi-a-GCST90001418	0.00537412	19.7431
rs79207264	CD24+ CD27+ AC	ebi-a-GCST90001418	0.00540658	19.863
rs7640784	CD24+ CD27+ AC	ebi-a-GCST90001418	0.00547691	20.1228
rs149085540	CD24+ CD27+ AC	ebi-a-GCST90001418	0.00553302	20.3302
rs17708396	CD24+ CD27+ AC	ebi-a-GCST90001418	0.00647625	23.8185
rs10942726	CD24+ CD27+ AC	ebi-a-GCST90001418	0.00537789	19.7571
rs35057381	CD24+ CD27+ AC	ebi-a-GCST90001418	0.00557371	20.4805
rs56033406	CD24+ CD27+ AC	ebi-a-GCST90001418	0.0059104	21.725
rs4076316	CD24+ CD27+ AC	ebi-a-GCST90001418	0.00718767	26.4539
rs144625305	CD24+ CD27+ AC	ebi-a-GCST90001418	0.00560835	20.6085
rs184496770	CD24+ CD27+ AC	ebi-a-GCST90001418	0.00540056	19.8408
rs118092259	CD24+ CD27+ AC	ebi-a-GCST90001418	0.00568525	20.8927
rs10759006	CD24+ CD27+ AC	ebi-a-GCST90001418	0.00534569	19.6381
rs10762541	CD24+ CD27+ AC	ebi-a-GCST90001418	0.00678258	24.9528
rs138329462	CD24+ CD27+ AC	ebi-a-GCST90001418	0.00593133	21.8024
rs557577736	CD24+ CD27+ AC	ebi-a-GCST90001418	0.00597535	21.9652
rs12874404	CD24+ CD27+ AC	ebi-a-GCST90001418	0.0109902	40.6046
rs73192651	CD24+ CD27+ AC	ebi-a-GCST90001418	0.00668434	24.5889
rs76552872	CD24+ CD27+ AC	ebi-a-GCST90001418	0.00563213	20.6964
rs77762131	CD24+ CD27+ AC	ebi-a-GCST90001418	0.00645926	23.7556
rs11653761	CD24+ CD27+ AC	ebi-a-GCST90001418	0.00620385	22.8104
rs11649808	CD24+ CD27+ AC	ebi-a-GCST90001418	0.00539392	19.8163
rs7254039	CD24+ CD27+ AC	ebi-a-GCST90001418	0.00539859	19.8335
rs728776	CD24+ CD27+ AC	ebi-a-GCST90001418	0.00549811	20.2011
rs144295598	CD24+ CD27+ AC	ebi-a-GCST90001418	0.00602676	22.1553
rs529500582	CD20- %B cell	ebi-a-GCST90001419	0.00651648	23.9805
rs187723151	CD20- %B cell	ebi-a-GCST90001419	0.00648049	23.8472
rs112180455	CD20- %B cell	ebi-a-GCST90001419	0.00556962	20.4766
rs58352426	CD20- %B cell	ebi-a-GCST90001419	0.00614041	22.588
rs75951284	CD20- %B cell	ebi-a-GCST90001419	0.00566722	20.8375
rs74786971	CD20- %B cell	ebi-a-GCST90001419	0.00553781	20.359
rs316122	CD20- %B cell	ebi-a-GCST90001419	0.00579999	21.3285
rs9270911	CD20- %B cell	ebi-a-GCST90001419	0.00613263	22.5593
rs9477367	CD20- %B cell	ebi-a-GCST90001419	0.00547207	20.116
rs111761453	CD20- %B cell	ebi-a-GCST90001419	0.00539671	19.8374
rs75368642	CD20- %B cell	ebi-a-GCST90001419	0.00555138	20.4091
rs7875273	CD20- %B cell	ebi-a-GCST90001419	0.005596	20.5741
rs118084343	CD20- %B cell	ebi-a-GCST90001419	0.00650826	23.9501
rs3885787	CD20- %B cell	ebi-a-GCST90001419	0.00560049	20.5907
rs4244568	CD20- %B cell	ebi-a-GCST90001419	0.00600896	22.1016
rs140134875	CD20- %B cell	ebi-a-GCST90001419	0.00626322	23.0426
rs4889373	CD20- %B cell	ebi-a-GCST90001419	0.00549776	20.2109
rs2107459	CD20- %B cell	ebi-a-GCST90001419	0.00577869	21.2497
rs7265879	CD20- %B cell	ebi-a-GCST90001419	0.00607141	22.3327
rs57840701	CD20- %B cell	ebi-a-GCST90001419	0.00561248	20.6351
rs115156019	IgD- CD38br AC	ebi-a-GCST90001420	0.00676342	24.8818
rs2792563	IgD- CD38br AC	ebi-a-GCST90001420	0.00534323	19.629
rs138158989	IgD- CD38br AC	ebi-a-GCST90001420	0.00607744	22.3428
rs114044800	IgD- CD38br AC	ebi-a-GCST90001420	0.00545335	20.0358
rs148362575	IgD- CD38br AC	ebi-a-GCST90001420	0.00626662	23.0426
rs66491584	IgD- CD38br AC	ebi-a-GCST90001420	0.00667804	24.5656
rs141490841	IgD- CD38br AC	ebi-a-GCST90001420	0.00550919	20.2421
rs62353585	IgD- CD38br AC	ebi-a-GCST90001420	0.0054107	19.8782
rs3105149	IgD- CD38br AC	ebi-a-GCST90001420	0.00542294	19.9235
rs78678130	IgD- CD38br AC	ebi-a-GCST90001420	0.00543494	19.9678
rs138058221	IgD- CD38br AC	ebi-a-GCST90001420	0.00574174	21.1015
rs10815908	IgD- CD38br AC	ebi-a-GCST90001420	0.00599356	22.0325
rs912755	IgD- CD38br AC	ebi-a-GCST90001420	0.00612314	22.5118
rs11605946	IgD- CD38br AC	ebi-a-GCST90001420	0.00567009	20.8366
rs79801395	IgD- CD38br AC	ebi-a-GCST90001420	0.00553452	20.3357
rs478251	IgD- CD38br AC	ebi-a-GCST90001420	0.0065848	24.2203
rs147319637	IgD- CD38br AC	ebi-a-GCST90001420	0.00580862	21.3487
rs11609248	IgD- CD38br AC	ebi-a-GCST90001420	0.00549783	20.2001
rs17037450	IgD- CD38br AC	ebi-a-GCST90001420	0.00569423	20.9259
rs2075365	IgD- CD38br AC	ebi-a-GCST90001420	0.00578038	21.2443
rs74011406	IgD- CD38br AC	ebi-a-GCST90001420	0.00597431	21.9613
rs72834736	IgD- CD38br AC	ebi-a-GCST90001420	0.00542116	19.9169
rs6712095	CD20- AC	ebi-a-GCST90001421	0.00556105	20.4393
rs57641238	CD20- AC	ebi-a-GCST90001421	0.00751983	27.6932
rs34625183	CD20- AC	ebi-a-GCST90001421	0.00543607	19.9774
rs36123742	CD20- AC	ebi-a-GCST90001421	0.00578156	21.2545
rs74786971	CD20- AC	ebi-a-GCST90001421	0.00615201	22.6248
rs116699251	CD20- AC	ebi-a-GCST90001421	0.00590636	21.716
rs41494	CD20- AC	ebi-a-GCST90001421	0.00556722	20.4621
rs7773849	CD20- AC	ebi-a-GCST90001421	0.00782478	28.8251
rs9273241	CD20- AC	ebi-a-GCST90001421	0.00712557	26.2309
rs2102662	CD20- AC	ebi-a-GCST90001421	0.00533349	19.5984
rs111761453	CD20- AC	ebi-a-GCST90001421	0.00560987	20.6197
rs38182	CD20- AC	ebi-a-GCST90001421	0.00590967	21.7283
rs6586822	CD20- AC	ebi-a-GCST90001421	0.00575985	21.1742
rs6482467	CD20- AC	ebi-a-GCST90001421	0.0053389	19.6184
rs16936840	CD20- AC	ebi-a-GCST90001421	0.0058668	21.5697
rs2212443	CD20- AC	ebi-a-GCST90001421	0.00558008	20.5096
rs12146943	CD20- AC	ebi-a-GCST90001421	0.00554837	20.3924
rs77553819	CD20- AC	ebi-a-GCST90001421	0.00586061	21.5468
rs71431666	CD20- AC	ebi-a-GCST90001421	0.005869	21.5778
rs252298	CD20- AC	ebi-a-GCST90001421	0.00553151	20.3301
rs56736306	CD20- AC	ebi-a-GCST90001421	0.00559038	20.5477
rs2637364	CD20- AC	ebi-a-GCST90001421	0.00583251	21.4429
rs6029245	CD20- AC	ebi-a-GCST90001421	0.00591218	21.7375
rs6052993	CD20- AC	ebi-a-GCST90001421	0.00566626	20.8282
rs6008703	CD20- AC	ebi-a-GCST90001421	0.00533842	19.6167
rs75839951	CD20- CD38- %B cell	ebi-a-GCST90001422	0.00617701	22.7297
rs4832496	CD20- CD38- %B cell	ebi-a-GCST90001422	0.00553587	20.3574
rs141595421	CD20- CD38- %B cell	ebi-a-GCST90001422	0.00539819	19.8483
rs396692	CD20- CD38- %B cell	ebi-a-GCST90001422	0.00558612	20.5432
rs182720746	CD20- CD38- %B cell	ebi-a-GCST90001422	0.00615489	22.6478
rs2215848	CD20- CD38- %B cell	ebi-a-GCST90001422	0.00593613	21.8381
rs62311900	CD20- CD38- %B cell	ebi-a-GCST90001422	0.00532395	19.5739
rs2339996	CD20- CD38- %B cell	ebi-a-GCST90001422	0.0071284	26.2557
rs13176237	CD20- CD38- %B cell	ebi-a-GCST90001422	0.00536558	19.7278
rs72492305	CD20- CD38- %B cell	ebi-a-GCST90001422	0.00697387	25.6825
rs56284619	CD20- CD38- %B cell	ebi-a-GCST90001422	0.0056065	20.6186
rs10988372	CD20- CD38- %B cell	ebi-a-GCST90001422	0.00551927	20.296
rs118073973	CD20- CD38- %B cell	ebi-a-GCST90001422	0.00563278	20.7157
rs72652459	CD20- CD38- %B cell	ebi-a-GCST90001422	0.00536084	19.7103
rs55767134	CD20- CD38- %B cell	ebi-a-GCST90001422	0.00596571	21.9475
rs34666228	CD20- CD38- %B cell	ebi-a-GCST90001422	0.00631916	23.2561
rs78301150	CD20- CD38- %B cell	ebi-a-GCST90001422	0.00633679	23.3214
rs55897487	CD20- CD38- %B cell	ebi-a-GCST90001422	0.0058305	21.4472
rs117308259	CD20- CD38- %B cell	ebi-a-GCST90001422	0.00846079	31.2051
rs17099538	CD20- CD38- %B cell	ebi-a-GCST90001422	0.00593065	21.8178
rs77911577	CD20- CD38- %B cell	ebi-a-GCST90001422	0.00538396	19.7957
rs2113943	CD20- CD38- %B cell	ebi-a-GCST90001422	0.00537136	19.7492
rs35639639	CD20- CD38- %B cell	ebi-a-GCST90001422	0.00539454	19.8348
rs16955339	CD20- CD38- %B cell	ebi-a-GCST90001422	0.00602598	22.1706
rs36071180	CD20- CD38- %B cell	ebi-a-GCST90001422	0.00543064	19.9683
rs6125184	CD20- CD38- %B cell	ebi-a-GCST90001422	0.00629702	23.1741
rs182720746	CD20- CD38- AC	ebi-a-GCST90001423	0.00563948	20.7349
rs62311900	CD20- CD38- AC	ebi-a-GCST90001423	0.00636566	23.4219
rs2339996	CD20- CD38- AC	ebi-a-GCST90001423	0.00673666	24.7963
rs72492305	CD20- CD38- AC	ebi-a-GCST90001423	0.00696697	25.65
rs6906886	CD20- CD38- AC	ebi-a-GCST90001423	0.00589922	21.6955
rs11203884	CD20- CD38- AC	ebi-a-GCST90001423	0.00609276	22.4117
rs10988372	CD20- CD38- AC	ebi-a-GCST90001423	0.00578835	21.2854
rs118073973	CD20- CD38- AC	ebi-a-GCST90001423	0.0059719	21.9644
rs75609575	CD20- CD38- AC	ebi-a-GCST90001423	0.00587354	21.6006
rs308820	CD20- CD38- AC	ebi-a-GCST90001423	0.00572302	21.0438
rs61906277	CD20- CD38- AC	ebi-a-GCST90001423	0.00700439	25.7887
rs117308259	CD20- CD38- AC	ebi-a-GCST90001423	0.005749	21.1399
rs16955339	CD20- CD38- AC	ebi-a-GCST90001423	0.00666122	24.5167
rs77510701	CD20- CD38- AC	ebi-a-GCST90001423	0.0055271	20.3194
rs80339814	CD20- CD38- AC	ebi-a-GCST90001423	0.00543561	19.9812
rs6125184	CD20- CD38- AC	ebi-a-GCST90001423	0.00534406	19.6429
rs36071180	CD20- CD38- AC	ebi-a-GCST90001423	0.00545596	20.0564
rs143109147	IgD+ %Lymphocyte	ebi-a-GCST90001424	0.00590444	21.7089
rs16837671	IgD+ %Lymphocyte	ebi-a-GCST90001424	0.00667672	24.5674
rs141070091	IgD+ %Lymphocyte	ebi-a-GCST90001424	0.0055104	20.2521
rs76845048	IgD+ %Lymphocyte	ebi-a-GCST90001424	0.00570681	20.9781
rs4361609	IgD+ %Lymphocyte	ebi-a-GCST90001424	0.00672288	24.7384
rs73078428	IgD+ %Lymphocyte	ebi-a-GCST90001424	0.00569948	20.951
rs111830700	IgD+ %Lymphocyte	ebi-a-GCST90001424	0.00566202	20.8125
rs34910780	IgD+ %Lymphocyte	ebi-a-GCST90001424	0.00640329	23.5548
rs2395904	IgD+ %Lymphocyte	ebi-a-GCST90001424	0.0061016	22.4383
rs533239981	IgD+ %Lymphocyte	ebi-a-GCST90001424	0.00542764	19.9463
rs1977295	IgD+ %Lymphocyte	ebi-a-GCST90001424	0.00593126	21.8081
rs75319860	IgD+ %Lymphocyte	ebi-a-GCST90001424	0.00552076	20.2904
rs116906133	IgD+ %Lymphocyte	ebi-a-GCST90001424	0.00610184	22.4391
rs12874404	IgD+ %Lymphocyte	ebi-a-GCST90001424	0.0143737	53.3018
rs2402519	IgD+ %Lymphocyte	ebi-a-GCST90001424	0.00613547	22.5636
rs11657531	IgD+ %Lymphocyte	ebi-a-GCST90001424	0.0104697	38.6715
rs12939565	IgD+ %Lymphocyte	ebi-a-GCST90001424	0.00725392	26.7068
rs75956343	IgD+ %Lymphocyte	ebi-a-GCST90001424	0.00539091	19.8106
rs55658072	IgD+ %Lymphocyte	ebi-a-GCST90001424	0.00590774	21.7211
rs6131010	IgD+ %Lymphocyte	ebi-a-GCST90001424	0.00605415	22.2627
rs970081	IgD- CD38br %lymphocyte	ebi-a-GCST90001425	0.00625874	23.0135
rs78196740	IgD- CD38br %lymphocyte	ebi-a-GCST90001425	0.00602372	22.1441
rs148362575	IgD- CD38br %lymphocyte	ebi-a-GCST90001425	0.00617936	22.7198
rs62160934	IgD- CD38br %lymphocyte	ebi-a-GCST90001425	0.00557438	20.483
rs138158989	IgD- CD38br %lymphocyte	ebi-a-GCST90001425	0.00604425	22.22
rs66491584	IgD- CD38br %lymphocyte	ebi-a-GCST90001425	0.00616577	22.6695
rs116540222	IgD- CD38br %lymphocyte	ebi-a-GCST90001425	0.0054713	20.1021
rs79812543	IgD- CD38br %lymphocyte	ebi-a-GCST90001425	0.0057809	21.2462
rs151009998	IgD- CD38br %lymphocyte	ebi-a-GCST90001425	0.0060841	22.3674
rs11938966	IgD- CD38br %lymphocyte	ebi-a-GCST90001425	0.00536136	19.696
rs114428590	IgD- CD38br %lymphocyte	ebi-a-GCST90001425	0.00538734	19.792
rs79264549	IgD- CD38br %lymphocyte	ebi-a-GCST90001425	0.0053814	19.77
rs6554754	IgD- CD38br %lymphocyte	ebi-a-GCST90001425	0.00559337	20.5531
rs139101653	IgD- CD38br %lymphocyte	ebi-a-GCST90001425	0.00539821	19.8321
rs76624801	IgD- CD38br %lymphocyte	ebi-a-GCST90001425	0.00586552	21.5591
rs187459109	IgD- CD38br %lymphocyte	ebi-a-GCST90001425	0.00661848	24.345
rs75346886	IgD- CD38br %lymphocyte	ebi-a-GCST90001425	0.00605166	22.2474
rs138058221	IgD- CD38br %lymphocyte	ebi-a-GCST90001425	0.00542034	19.9139
rs148377259	IgD- CD38br %lymphocyte	ebi-a-GCST90001425	0.00632086	23.2433
rs12340211	IgD- CD38br %lymphocyte	ebi-a-GCST90001425	0.00618881	22.7547
rs113087021	IgD- CD38br %lymphocyte	ebi-a-GCST90001425	0.00540227	19.8471
rs478251	IgD- CD38br %lymphocyte	ebi-a-GCST90001425	0.00566934	20.8339
rs6488283	IgD- CD38br %lymphocyte	ebi-a-GCST90001425	0.005548	20.3855
rs7294591	IgD- CD38br %lymphocyte	ebi-a-GCST90001425	0.00648477	23.85
rs11609248	IgD- CD38br %lymphocyte	ebi-a-GCST90001425	0.00626181	23.0248
rs17037450	IgD- CD38br %lymphocyte	ebi-a-GCST90001425	0.00546052	20.0623
rs72686093	IgD- CD38br %lymphocyte	ebi-a-GCST90001425	0.0062647	23.0355
rs2627305	IgD- CD38br %lymphocyte	ebi-a-GCST90001425	0.0055013	20.2129
rs4785074	IgD- CD38br %lymphocyte	ebi-a-GCST90001425	0.00738811	27.1971
rs72834736	IgD- CD38br %lymphocyte	ebi-a-GCST90001425	0.00578482	21.2607
rs76348547	IgD- CD38br %lymphocyte	ebi-a-GCST90001425	0.00623292	22.9179
rs500586	IgD- CD38dim %lymphocyte	ebi-a-GCST90001426	0.00534948	19.6521
rs72691171	IgD- CD38dim %lymphocyte	ebi-a-GCST90001426	0.00545163	20.0294
rs143785715	IgD- CD38dim %lymphocyte	ebi-a-GCST90001426	0.00573832	21.0888
rs10922490	IgD- CD38dim %lymphocyte	ebi-a-GCST90001426	0.00663743	24.4152
rs11687597	IgD- CD38dim %lymphocyte	ebi-a-GCST90001426	0.0081095	29.8744
rs7595246	IgD- CD38dim %lymphocyte	ebi-a-GCST90001426	0.00724694	26.6736
rs71612685	IgD- CD38dim %lymphocyte	ebi-a-GCST90001426	0.00595551	21.8918
rs1867929	IgD- CD38dim %lymphocyte	ebi-a-GCST90001426	0.00532575	19.5645
rs114839471	IgD- CD38dim %lymphocyte	ebi-a-GCST90001426	0.00552353	20.2951
rs17405603	IgD- CD38dim %lymphocyte	ebi-a-GCST90001426	0.00608929	22.3866
rs146936090	IgD- CD38dim %lymphocyte	ebi-a-GCST90001426	0.00625791	23.0104
rs6972846	IgD- CD38dim %lymphocyte	ebi-a-GCST90001426	0.00623111	22.9112
rs78027513	IgD- CD38dim %lymphocyte	ebi-a-GCST90001426	0.00570599	20.9694
rs7840395	IgD- CD38dim %lymphocyte	ebi-a-GCST90001426	0.0090404	33.335
rs2137277	IgD- CD38dim %lymphocyte	ebi-a-GCST90001426	0.00551666	20.2697
rs72816858	IgD- CD38dim %lymphocyte	ebi-a-GCST90001426	0.00610124	22.4308
rs12298227	IgD- CD38dim %lymphocyte	ebi-a-GCST90001426	0.00675241	24.8411
rs593370	IgD- CD38dim %lymphocyte	ebi-a-GCST90001426	0.00555996	20.4297
rs9520836	IgD- CD38dim %lymphocyte	ebi-a-GCST90001426	0.00770661	28.3786
rs118086652	IgD- CD38dim %lymphocyte	ebi-a-GCST90001426	0.00572666	21.0457
rs11653761	IgD- CD38dim %lymphocyte	ebi-a-GCST90001426	0.00737994	27.1668
rs145744014	IgD- CD38dim %lymphocyte	ebi-a-GCST90001426	0.00553704	20.345
rs652344	IgD- CD38dim %lymphocyte	ebi-a-GCST90001426	0.00550971	20.244
rs2328245	IgD- CD38dim %lymphocyte	ebi-a-GCST90001426	0.00558801	20.5333
rs134927	IgD- CD38dim %lymphocyte	ebi-a-GCST90001426	0.00560097	20.5812
rs61790670	IgD- CD38- %lymphocyte	ebi-a-GCST90001427	0.0074087	27.2735
rs116661843	IgD- CD38- %lymphocyte	ebi-a-GCST90001427	0.00532554	19.5637
rs12128328	IgD- CD38- %lymphocyte	ebi-a-GCST90001427	0.00592145	21.7659
rs12624265	IgD- CD38- %lymphocyte	ebi-a-GCST90001427	0.00548581	20.1557
rs12992631	IgD- CD38- %lymphocyte	ebi-a-GCST90001427	0.00551214	20.253
rs2084194	IgD- CD38- %lymphocyte	ebi-a-GCST90001427	0.00548818	20.1645
rs6723786	IgD- CD38- %lymphocyte	ebi-a-GCST90001427	0.00717751	26.4162
rs114551034	IgD- CD38- %lymphocyte	ebi-a-GCST90001427	0.00619702	22.7851
rs75524570	IgD- CD38- %lymphocyte	ebi-a-GCST90001427	0.0055838	20.5178
rs150378941	IgD- CD38- %lymphocyte	ebi-a-GCST90001427	0.00556398	20.4445
rs72942964	IgD- CD38- %lymphocyte	ebi-a-GCST90001427	0.00569962	20.9458
rs7676571	IgD- CD38- %lymphocyte	ebi-a-GCST90001427	0.00555611	20.4154
rs4697617	IgD- CD38- %lymphocyte	ebi-a-GCST90001427	0.00541631	19.899
rs72711540	IgD- CD38- %lymphocyte	ebi-a-GCST90001427	0.00544513	20.0055
rs17405603	IgD- CD38- %lymphocyte	ebi-a-GCST90001427	0.00619156	22.7649
rs144625305	IgD- CD38- %lymphocyte	ebi-a-GCST90001427	0.0055494	20.3907
rs11777835	IgD- CD38- %lymphocyte	ebi-a-GCST90001427	0.0067218	24.7277
rs190799514	IgD- CD38- %lymphocyte	ebi-a-GCST90001427	0.00705981	25.98
rs75116337	IgD- CD38- %lymphocyte	ebi-a-GCST90001427	0.00558781	20.5326
rs814418	IgD- CD38- %lymphocyte	ebi-a-GCST90001427	0.0057513	21.1368
rs4756916	IgD- CD38- %lymphocyte	ebi-a-GCST90001427	0.00541553	19.8961
rs17234595	IgD- CD38- %lymphocyte	ebi-a-GCST90001427	0.00537668	19.7526
rs12426629	IgD- CD38- %lymphocyte	ebi-a-GCST90001427	0.00568888	20.9061
rs9514859	IgD- CD38- %lymphocyte	ebi-a-GCST90001427	0.00633531	23.2968
rs12874404	IgD- CD38- %lymphocyte	ebi-a-GCST90001427	0.00756017	27.8353
rs4474666	IgD- CD38- %lymphocyte	ebi-a-GCST90001427	0.0056159	20.6364
rs11653761	IgD- CD38- %lymphocyte	ebi-a-GCST90001427	0.00599258	22.0289
rs34157595	IgD- CD38- %lymphocyte	ebi-a-GCST90001427	0.00534518	19.6362
rs7236090	IgD- CD38- %lymphocyte	ebi-a-GCST90001427	0.00589857	21.6813
rs77741094	IgD- CD38- %lymphocyte	ebi-a-GCST90001427	0.00641355	23.5864
rs112904733	IgD- CD38dim %B cell	ebi-a-GCST90001428	0.00581988	21.3962
rs143109147	IgD- CD38dim %B cell	ebi-a-GCST90001428	0.00536163	19.7024
rs12118242	IgD- CD38dim %B cell	ebi-a-GCST90001428	0.00548824	20.1702
rs9424499	IgD- CD38dim %B cell	ebi-a-GCST90001428	0.00719129	26.4745
rs16832731	IgD- CD38dim %B cell	ebi-a-GCST90001428	0.00604389	22.2247
rs138919897	IgD- CD38dim %B cell	ebi-a-GCST90001428	0.00558108	20.5133
rs73205209	IgD- CD38dim %B cell	ebi-a-GCST90001428	0.00598267	21.9983
rs111854570	IgD- CD38dim %B cell	ebi-a-GCST90001428	0.00575009	21.1381
rs114839471	IgD- CD38dim %B cell	ebi-a-GCST90001428	0.00556972	20.4714
rs17405749	IgD- CD38dim %B cell	ebi-a-GCST90001428	0.00630294	23.1834
rs80088375	IgD- CD38dim %B cell	ebi-a-GCST90001428	0.00554745	20.389
rs75273600	IgD- CD38dim %B cell	ebi-a-GCST90001428	0.00707907	26.0585
rs849133	IgD- CD38dim %B cell	ebi-a-GCST90001428	0.00535395	19.674
rs146267894	IgD- CD38dim %B cell	ebi-a-GCST90001428	0.0054156	19.9018
rs2397752	IgD- CD38dim %B cell	ebi-a-GCST90001428	0.0063421	23.3283
rs117987395	IgD- CD38dim %B cell	ebi-a-GCST90001428	0.00542298	19.9291
rs80216562	IgD- CD38dim %B cell	ebi-a-GCST90001428	0.00710096	26.1396
rs10743163	IgD- CD38dim %B cell	ebi-a-GCST90001428	0.00578892	21.2817
rs61946381	IgD- CD38dim %B cell	ebi-a-GCST90001428	0.00532612	19.5712
rs1846398	IgD- CD38dim %B cell	ebi-a-GCST90001428	0.00539176	19.8137
rs4038038	IgD- CD38dim %B cell	ebi-a-GCST90001428	0.00588797	21.648
rs117227598	IgD- CD38dim %B cell	ebi-a-GCST90001428	0.00547417	20.1182
rs11548656	IgD- CD38dim %B cell	ebi-a-GCST90001428	0.0058717	21.5878
rs75659776	IgD- CD38dim %B cell	ebi-a-GCST90001428	0.00599479	22.0431
rs117541917	IgD- CD38dim %B cell	ebi-a-GCST90001428	0.00538554	19.7907
rs113530462	IgD- CD38dim %B cell	ebi-a-GCST90001428	0.0055691	20.469
rs1919856	IgD+ CD38br %lymphocyte	ebi-a-GCST90001429	0.0056131	20.6261
rs11682311	IgD+ CD38br %lymphocyte	ebi-a-GCST90001429	0.00657022	24.1664
rs4907205	IgD+ CD38br %lymphocyte	ebi-a-GCST90001429	0.00534393	19.6316
rs140380950	IgD+ CD38br %lymphocyte	ebi-a-GCST90001429	0.0085607	31.5509
rs2686423	IgD+ CD38br %lymphocyte	ebi-a-GCST90001429	0.00553326	20.331
rs76112278	IgD+ CD38br %lymphocyte	ebi-a-GCST90001429	0.00640365	23.5497
rs7667070	IgD+ CD38br %lymphocyte	ebi-a-GCST90001429	0.00540508	19.8575
rs78658073	IgD+ CD38br %lymphocyte	ebi-a-GCST90001429	0.00651786	23.9725
rs80330977	IgD+ CD38br %lymphocyte	ebi-a-GCST90001429	0.0072578	26.7139
rs76660971	IgD+ CD38br %lymphocyte	ebi-a-GCST90001429	0.00615899	22.6444
rs2857599	IgD+ CD38br %lymphocyte	ebi-a-GCST90001429	0.00558163	20.5097
rs117772462	IgD+ CD38br %lymphocyte	ebi-a-GCST90001429	0.00628314	23.1037
rs11185560	IgD+ CD38br %lymphocyte	ebi-a-GCST90001429	0.00595739	21.8988
rs10103048	IgD+ CD38br %lymphocyte	ebi-a-GCST90001429	0.00595649	21.8954
rs1695681	IgD+ CD38br %lymphocyte	ebi-a-GCST90001429	0.00665471	24.4792
rs13300113	IgD+ CD38br %lymphocyte	ebi-a-GCST90001429	0.00545185	20.0303
rs10821937	IgD+ CD38br %lymphocyte	ebi-a-GCST90001429	0.00561517	20.6337
rs10832409	IgD+ CD38br %lymphocyte	ebi-a-GCST90001429	0.00583628	21.451
rs11068290	IgD+ CD38br %lymphocyte	ebi-a-GCST90001429	0.00647742	23.8228
rs59879144	IgD+ CD38br %lymphocyte	ebi-a-GCST90001429	0.00619246	22.7683
rs10877626	IgD+ CD38br %lymphocyte	ebi-a-GCST90001429	0.00554379	20.37
rs17408660	IgD+ CD38br %lymphocyte	ebi-a-GCST90001429	0.00543951	19.9847
rs75589249	IgD+ CD38br %lymphocyte	ebi-a-GCST90001429	0.00549918	20.2051
rs3811315	IgD+ CD38br %lymphocyte	ebi-a-GCST90001429	0.00604431	22.2202
rs2216762	IgD+ CD38br %lymphocyte	ebi-a-GCST90001429	0.00658841	24.2337
rs60521331	IgD+ CD38br %lymphocyte	ebi-a-GCST90001429	0.00619851	22.7906
rs55708924	IgD+ CD38br %lymphocyte	ebi-a-GCST90001429	0.00540274	19.8488
rs143109147	IgD+ CD38dim %lymphocyte	ebi-a-GCST90001430	0.00696588	25.6319
rs55877424	IgD+ CD38dim %lymphocyte	ebi-a-GCST90001430	0.00534206	19.6247
rs149290264	IgD+ CD38dim %lymphocyte	ebi-a-GCST90001430	0.00538363	19.7783
rs182174914	IgD+ CD38dim %lymphocyte	ebi-a-GCST90001430	0.00534624	19.6401
rs10933716	IgD+ CD38dim %lymphocyte	ebi-a-GCST90001430	0.00562518	20.6707
rs28399382	IgD+ CD38dim %lymphocyte	ebi-a-GCST90001430	0.00570769	20.9756
rs28654727	IgD+ CD38dim %lymphocyte	ebi-a-GCST90001430	0.00544938	20.0211
rs6831487	IgD+ CD38dim %lymphocyte	ebi-a-GCST90001430	0.0060627	22.2882
rs75512885	IgD+ CD38dim %lymphocyte	ebi-a-GCST90001430	0.00565191	20.7695
rs1510971	IgD+ CD38dim %lymphocyte	ebi-a-GCST90001430	0.00565353	20.7755
rs12516105	IgD+ CD38dim %lymphocyte	ebi-a-GCST90001430	0.0058331	21.4392
rs4361609	IgD+ CD38dim %lymphocyte	ebi-a-GCST90001430	0.00544161	19.9924
rs9459562	IgD+ CD38dim %lymphocyte	ebi-a-GCST90001430	0.00549844	20.2024
rs34910780	IgD+ CD38dim %lymphocyte	ebi-a-GCST90001430	0.00548964	20.1699
rs62474511	IgD+ CD38dim %lymphocyte	ebi-a-GCST90001430	0.00633768	23.3056
rs4716961	IgD+ CD38dim %lymphocyte	ebi-a-GCST90001430	0.00559263	20.5504
rs7840067	IgD+ CD38dim %lymphocyte	ebi-a-GCST90001430	0.00700728	25.7853
rs533239981	IgD+ CD38dim %lymphocyte	ebi-a-GCST90001430	0.00608371	22.3659
rs60953943	IgD+ CD38dim %lymphocyte	ebi-a-GCST90001430	0.00618596	22.7442
rs76400856	IgD+ CD38dim %lymphocyte	ebi-a-GCST90001430	0.0057647	21.1864
rs74151247	IgD+ CD38dim %lymphocyte	ebi-a-GCST90001430	0.00647912	23.8291
rs75319860	IgD+ CD38dim %lymphocyte	ebi-a-GCST90001430	0.00581394	21.3684
rs139695291	IgD+ CD38dim %lymphocyte	ebi-a-GCST90001430	0.00553127	20.3237
rs75474045	IgD+ CD38dim %lymphocyte	ebi-a-GCST90001430	0.00593082	21.8005
rs12874404	IgD+ CD38dim %lymphocyte	ebi-a-GCST90001430	0.00739713	27.2305
rs116844769	IgD+ CD38dim %lymphocyte	ebi-a-GCST90001430	0.00606513	22.2972
rs16974449	IgD+ CD38dim %lymphocyte	ebi-a-GCST90001430	0.00690799	25.4174
rs60521331	IgD+ CD38dim %lymphocyte	ebi-a-GCST90001430	0.00676394	24.8837
rs11657531	IgD+ CD38dim %lymphocyte	ebi-a-GCST90001430	0.00658822	24.233
rs2291516	IgD+ CD38dim %lymphocyte	ebi-a-GCST90001430	0.00534542	19.6371
rs655580	IgD+ CD38dim %lymphocyte	ebi-a-GCST90001430	0.0073191	26.9412
rs6131010	IgD+ CD38dim %lymphocyte	ebi-a-GCST90001430	0.00569232	20.9188
rs55708924	IgD+ CD38dim %lymphocyte	ebi-a-GCST90001430	0.00634804	23.3439
rs143518319	IgD+ CD38dim %lymphocyte	ebi-a-GCST90001430	0.00549324	20.1832
rs142838362	IgD+ CD38dim %lymphocyte	ebi-a-GCST90001430	0.00599997	22.0562
rs149701635	IgD+ CD38- %lymphocyte	ebi-a-GCST90001431	0.00567522	20.8556
rs35088452	IgD+ CD38- %lymphocyte	ebi-a-GCST90001431	0.00612203	22.5077
rs6895553	IgD+ CD38- %lymphocyte	ebi-a-GCST90001431	0.00590021	21.6873
rs78009119	IgD+ CD38- %lymphocyte	ebi-a-GCST90001431	0.00604927	22.2386
rs77055472	IgD+ CD38- %lymphocyte	ebi-a-GCST90001431	0.00589113	21.6538
rs12197754	IgD+ CD38- %lymphocyte	ebi-a-GCST90001431	0.00570742	20.9746
rs144625305	IgD+ CD38- %lymphocyte	ebi-a-GCST90001431	0.00551369	20.2587
rs12763172	IgD+ CD38- %lymphocyte	ebi-a-GCST90001431	0.0056775	20.864
rs12146653	IgD+ CD38- %lymphocyte	ebi-a-GCST90001431	0.00571856	21.0158
rs12829274	IgD+ CD38- %lymphocyte	ebi-a-GCST90001431	0.0063722	23.4334
rs3730631	IgD+ CD38- %lymphocyte	ebi-a-GCST90001431	0.00625611	23.0037
rs12874404	IgD+ CD38- %lymphocyte	ebi-a-GCST90001431	0.0112042	41.4039
rs112782756	IgD+ CD38- %lymphocyte	ebi-a-GCST90001431	0.0055673	20.4568
rs2003291	IgD+ CD38- %lymphocyte	ebi-a-GCST90001431	0.00538962	19.8004
rs77762131	IgD+ CD38- %lymphocyte	ebi-a-GCST90001431	0.0100414	37.0636
rs72706301	IgD+ CD38- %lymphocyte	ebi-a-GCST90001431	0.00616671	22.673
rs149731447	IgD+ CD38- %lymphocyte	ebi-a-GCST90001431	0.00541723	19.9024
rs10444793	IgD+ CD38- %lymphocyte	ebi-a-GCST90001431	0.00597077	21.9483
rs28594458	IgD+ CD38- %lymphocyte	ebi-a-GCST90001431	0.00599051	22.0212
rs62235484	IgD+ CD38- %lymphocyte	ebi-a-GCST90001431	0.0067028	24.6573
rs78007261	IgD+ CD38- %lymphocyte	ebi-a-GCST90001431	0.00570613	20.9698
rs75766272	Unsw Mem %lymphocyte	ebi-a-GCST90001432	0.00586753	21.5665
rs56326639	Unsw Mem %lymphocyte	ebi-a-GCST90001432	0.00556501	20.4483
rs6557137	Unsw Mem %lymphocyte	ebi-a-GCST90001432	0.00585013	21.5022
rs144625305	Unsw Mem %lymphocyte	ebi-a-GCST90001432	0.00541716	19.9021
rs2956955	Unsw Mem %lymphocyte	ebi-a-GCST90001432	0.00632384	23.2544
rs141247883	Unsw Mem %lymphocyte	ebi-a-GCST90001432	0.00589223	21.6578
rs57757402	Unsw Mem %lymphocyte	ebi-a-GCST90001432	0.00561701	20.6405
rs11794578	Unsw Mem %lymphocyte	ebi-a-GCST90001432	0.00646886	23.7911
rs10119513	Unsw Mem %lymphocyte	ebi-a-GCST90001432	0.00532762	19.5714
rs10840410	Unsw Mem %lymphocyte	ebi-a-GCST90001432	0.00544493	20.0047
rs10894530	Unsw Mem %lymphocyte	ebi-a-GCST90001432	0.00537824	19.7584
rs143553941	Unsw Mem %lymphocyte	ebi-a-GCST90001432	0.00596081	21.9114
rs12829274	Unsw Mem %lymphocyte	ebi-a-GCST90001432	0.00669167	24.6161
rs73192651	Unsw Mem %lymphocyte	ebi-a-GCST90001432	0.0103847	38.3439
rs12874404	Unsw Mem %lymphocyte	ebi-a-GCST90001432	0.0130766	48.4151
rs557577736	Unsw Mem %lymphocyte	ebi-a-GCST90001432	0.00597371	21.9591
rs77762131	Unsw Mem %lymphocyte	ebi-a-GCST90001432	0.00901073	33.2246
rs8014978	Unsw Mem %lymphocyte	ebi-a-GCST90001432	0.00648293	23.8432
rs112135308	Unsw Mem %lymphocyte	ebi-a-GCST90001432	0.00603028	22.1683
rs11657759	Unsw Mem %lymphocyte	ebi-a-GCST90001432	0.0076507	28.1712
rs7254039	Unsw Mem %lymphocyte	ebi-a-GCST90001432	0.00591534	21.7433
rs6032660	Unsw Mem %lymphocyte	ebi-a-GCST90001432	0.00911955	33.6295
rs76762356	Unsw Mem %lymphocyte	ebi-a-GCST90001432	0.00544583	20.008
rs55712190	Unsw Mem %lymphocyte	ebi-a-GCST90001432	0.00632275	23.2503
rs2789568	IgD- CD27- %lymphocyte	ebi-a-GCST90001433	0.00709747	26.1195
rs113442137	IgD- CD27- %lymphocyte	ebi-a-GCST90001433	0.00616709	22.6744
rs185621536	IgD- CD27- %lymphocyte	ebi-a-GCST90001433	0.00582785	21.4198
rs7606024	IgD- CD27- %lymphocyte	ebi-a-GCST90001433	0.00634222	23.3224
rs35574803	IgD- CD27- %lymphocyte	ebi-a-GCST90001433	0.00862612	31.7941
rs78756830	IgD- CD27- %lymphocyte	ebi-a-GCST90001433	0.00633064	23.2795
rs12654363	IgD- CD27- %lymphocyte	ebi-a-GCST90001433	0.00589736	21.6768
rs191610741	IgD- CD27- %lymphocyte	ebi-a-GCST90001433	0.00569685	20.9356
rs807894	IgD- CD27- %lymphocyte	ebi-a-GCST90001433	0.00549682	20.1964
rs1978170	IgD- CD27- %lymphocyte	ebi-a-GCST90001433	0.00535084	19.6571
rs78763642	IgD- CD27- %lymphocyte	ebi-a-GCST90001433	0.00580618	21.3397
rs2250246	IgD- CD27- %lymphocyte	ebi-a-GCST90001433	0.00791092	29.137
rs77114347	IgD- CD27- %lymphocyte	ebi-a-GCST90001433	0.00541286	19.8862
rs4941188	IgD- CD27- %lymphocyte	ebi-a-GCST90001433	0.00642885	23.643
rs111407982	IgD- CD27- %lymphocyte	ebi-a-GCST90001433	0.00619389	22.7735
rs7260348	IgD- CD27- %lymphocyte	ebi-a-GCST90001433	0.00604711	22.2306
rs77126700	IgD- CD27- %lymphocyte	ebi-a-GCST90001433	0.00577101	21.2097
rs4810485	IgD- CD27- %lymphocyte	ebi-a-GCST90001433	0.0384434	146.088
rs7595246	Sw mem %lymphocyte	ebi-a-GCST90001434	0.00779099	28.6918
rs1519526	Sw mem %lymphocyte	ebi-a-GCST90001434	0.00757932	27.9063
rs7640978	Sw mem %lymphocyte	ebi-a-GCST90001434	0.00586709	21.5649
rs17029267	Sw mem %lymphocyte	ebi-a-GCST90001434	0.00546856	20.092
rs62382785	Sw mem %lymphocyte	ebi-a-GCST90001434	0.00556805	20.4596
rs17405603	Sw mem %lymphocyte	ebi-a-GCST90001434	0.00633844	23.3084
rs190799514	Sw mem %lymphocyte	ebi-a-GCST90001434	0.00611115	22.4674
rs7840395	Sw mem %lymphocyte	ebi-a-GCST90001434	0.00884358	32.6028
rs814418	Sw mem %lymphocyte	ebi-a-GCST90001434	0.0053418	19.6238
rs118076634	Sw mem %lymphocyte	ebi-a-GCST90001434	0.00648198	23.8397
rs12426629	Sw mem %lymphocyte	ebi-a-GCST90001434	0.00694248	25.5452
rs726449	Sw mem %lymphocyte	ebi-a-GCST90001434	0.00556436	20.4459
rs9520836	Sw mem %lymphocyte	ebi-a-GCST90001434	0.0108108	39.9344
rs11653761	Sw mem %lymphocyte	ebi-a-GCST90001434	0.0097198	35.8648
rs145744014	Sw mem %lymphocyte	ebi-a-GCST90001434	0.00551792	20.2744
rs138728953	Sw mem %lymphocyte	ebi-a-GCST90001434	0.0053915	19.8073
rs117231919	Sw mem %lymphocyte	ebi-a-GCST90001434	0.00551349	20.258
rs377621503	Sw mem %lymphocyte	ebi-a-GCST90001434	0.00539182	19.8085
rs141365416	PB/PC %lymphocyte	ebi-a-GCST90001435	0.00598543	22.0085
rs148362575	PB/PC %lymphocyte	ebi-a-GCST90001435	0.00605385	22.2616
rs116540222	PB/PC %lymphocyte	ebi-a-GCST90001435	0.00596342	21.9271
rs7449190	PB/PC %lymphocyte	ebi-a-GCST90001435	0.00584203	21.4781
rs61294310	PB/PC %lymphocyte	ebi-a-GCST90001435	0.00626223	23.0327
rs13244540	PB/PC %lymphocyte	ebi-a-GCST90001435	0.00571433	21.0059
rs62519719	PB/PC %lymphocyte	ebi-a-GCST90001435	0.00559557	20.5669
rs74326785	PB/PC %lymphocyte	ebi-a-GCST90001435	0.00601074	22.1021
rs3138500	PB/PC %lymphocyte	ebi-a-GCST90001435	0.00601733	22.1265
rs12412378	PB/PC %lymphocyte	ebi-a-GCST90001435	0.00778658	28.6833
rs1938685	PB/PC %lymphocyte	ebi-a-GCST90001435	0.00536342	19.709
rs897989	PB/PC %lymphocyte	ebi-a-GCST90001435	0.00540368	19.8578
rs55728331	PB/PC %lymphocyte	ebi-a-GCST90001435	0.00596747	21.9421
rs10849436	PB/PC %lymphocyte	ebi-a-GCST90001435	0.00549998	20.2136
rs1838357	PB/PC %lymphocyte	ebi-a-GCST90001435	0.00532291	19.5594
rs4785074	PB/PC %lymphocyte	ebi-a-GCST90001435	0.00813365	29.9723
rs7255292	PB/PC %lymphocyte	ebi-a-GCST90001435	0.0056891	20.9126
rs8132059	PB/PC %lymphocyte	ebi-a-GCST90001435	0.00550514	20.2327
rs11089305	PB/PC %lymphocyte	ebi-a-GCST90001435	0.00632548	23.2668
rs75414548	Memory B cell %lymphocyte	ebi-a-GCST90001436	0.00542737	19.9398
rs75766272	Memory B cell %lymphocyte	ebi-a-GCST90001436	0.00587508	21.5944
rs878471	Memory B cell %lymphocyte	ebi-a-GCST90001436	0.00553108	20.323
rs12636848	Memory B cell %lymphocyte	ebi-a-GCST90001436	0.00594999	21.8714
rs143003356	Memory B cell %lymphocyte	ebi-a-GCST90001436	0.00570467	20.9645
rs17708396	Memory B cell %lymphocyte	ebi-a-GCST90001436	0.00634355	23.3273
rs6895553	Memory B cell %lymphocyte	ebi-a-GCST90001436	0.00544822	20.0168
rs1770731	Memory B cell %lymphocyte	ebi-a-GCST90001436	0.00555323	20.4048
rs74505387	Memory B cell %lymphocyte	ebi-a-GCST90001436	0.00714312	26.2887
rs410173	Memory B cell %lymphocyte	ebi-a-GCST90001436	0.00548104	20.1381
rs144625305	Memory B cell %lymphocyte	ebi-a-GCST90001436	0.00565295	20.7733
rs6558507	Memory B cell %lymphocyte	ebi-a-GCST90001436	0.00566025	20.8003
rs34173062	Memory B cell %lymphocyte	ebi-a-GCST90001436	0.00641354	23.5864
rs12763172	Memory B cell %lymphocyte	ebi-a-GCST90001436	0.00626703	23.0442
rs10791220	Memory B cell %lymphocyte	ebi-a-GCST90001436	0.00576569	21.19
rs11225155	Memory B cell %lymphocyte	ebi-a-GCST90001436	0.00560313	20.5892
rs74839056	Memory B cell %lymphocyte	ebi-a-GCST90001436	0.00537827	19.7585
rs557577736	Memory B cell %lymphocyte	ebi-a-GCST90001436	0.00593368	21.8111
rs12874404	Memory B cell %lymphocyte	ebi-a-GCST90001436	0.0192768	71.8219
rs9514859	Memory B cell %lymphocyte	ebi-a-GCST90001436	0.00559693	20.5663
rs73192651	Memory B cell %lymphocyte	ebi-a-GCST90001436	0.00684228	25.1739
rs77762131	Memory B cell %lymphocyte	ebi-a-GCST90001436	0.00766649	28.2298
rs974368	Memory B cell %lymphocyte	ebi-a-GCST90001436	0.00578031	21.2441
rs139196765	Memory B cell %lymphocyte	ebi-a-GCST90001436	0.00667855	24.5675
rs11653761	Memory B cell %lymphocyte	ebi-a-GCST90001436	0.00833891	30.7266
rs7254039	Memory B cell %lymphocyte	ebi-a-GCST90001436	0.00571714	21.0105
rs551529415	Memory B cell %lymphocyte	ebi-a-GCST90001436	0.00584911	21.4984
rs3810559	Memory B cell %lymphocyte	ebi-a-GCST90001436	0.00577248	21.2151
rs4640493	Memory B cell %lymphocyte	ebi-a-GCST90001436	0.00579574	21.3011
rs9614226	Memory B cell %lymphocyte	ebi-a-GCST90001436	0.00538783	19.7938
rs11937214	Naive-mature B cell %lymphocyte	ebi-a-GCST90001437	0.00536601	19.7132
rs76845048	Naive-mature B cell %lymphocyte	ebi-a-GCST90001437	0.00556031	20.431
rs115204570	Naive-mature B cell %lymphocyte	ebi-a-GCST90001437	0.00590347	21.6994
rs17056318	Naive-mature B cell %lymphocyte	ebi-a-GCST90001437	0.00661648	24.3376
rs4361609	Naive-mature B cell %lymphocyte	ebi-a-GCST90001437	0.00537267	19.7378
rs35607968	Naive-mature B cell %lymphocyte	ebi-a-GCST90001437	0.00598381	21.9965
rs111830700	Naive-mature B cell %lymphocyte	ebi-a-GCST90001437	0.00554742	20.3834
rs140197720	Naive-mature B cell %lymphocyte	ebi-a-GCST90001437	0.00569193	20.9174
rs2395904	Naive-mature B cell %lymphocyte	ebi-a-GCST90001437	0.00798767	29.422
rs4361743	Naive-mature B cell %lymphocyte	ebi-a-GCST90001437	0.00551145	20.2505
rs533239981	Naive-mature B cell %lymphocyte	ebi-a-GCST90001437	0.00725084	26.6881
rs2978582	Naive-mature B cell %lymphocyte	ebi-a-GCST90001437	0.00619866	22.7912
rs74151247	Naive-mature B cell %lymphocyte	ebi-a-GCST90001437	0.00575136	21.137
rs56097028	Naive-mature B cell %lymphocyte	ebi-a-GCST90001437	0.00555075	20.3956
rs74397782	Naive-mature B cell %lymphocyte	ebi-a-GCST90001437	0.00625436	22.9973
rs78433555	Naive-mature B cell %lymphocyte	ebi-a-GCST90001437	0.00634054	23.3162
rs116844769	Naive-mature B cell %lymphocyte	ebi-a-GCST90001437	0.00581174	21.3602
rs112850074	Naive-mature B cell %lymphocyte	ebi-a-GCST90001437	0.00632555	23.2607
rs12939565	Naive-mature B cell %lymphocyte	ebi-a-GCST90001437	0.00564136	20.7305
rs11653761	Naive-mature B cell %lymphocyte	ebi-a-GCST90001437	0.00557633	20.4902
rs4805840	Naive-mature B cell %lymphocyte	ebi-a-GCST90001437	0.00634647	23.3381
rs55658072	Naive-mature B cell %lymphocyte	ebi-a-GCST90001437	0.00534463	19.6342
rs7270264	Naive-mature B cell %lymphocyte	ebi-a-GCST90001437	0.00560168	20.5839
rs55708924	Naive-mature B cell %lymphocyte	ebi-a-GCST90001437	0.00542506	19.9313
rs77848220	IgD- CD38dim AC	ebi-a-GCST90001438	0.00657699	24.1914
rs7595246	IgD- CD38dim AC	ebi-a-GCST90001438	0.00578645	21.2667
rs115414430	IgD- CD38dim AC	ebi-a-GCST90001438	0.00590365	21.7001
rs1519524	IgD- CD38dim AC	ebi-a-GCST90001438	0.00645983	23.7577
rs141352577	IgD- CD38dim AC	ebi-a-GCST90001438	0.00617465	22.7023
rs73185679	IgD- CD38dim AC	ebi-a-GCST90001438	0.00534286	19.6277
rs7840395	IgD- CD38dim AC	ebi-a-GCST90001438	0.00741127	27.283
rs16925715	IgD- CD38dim AC	ebi-a-GCST90001438	0.00629098	23.1328
rs149006488	IgD- CD38dim AC	ebi-a-GCST90001438	0.00582037	21.3921
rs61910510	IgD- CD38dim AC	ebi-a-GCST90001438	0.00621925	22.8674
rs4936106	IgD- CD38dim AC	ebi-a-GCST90001438	0.00585023	21.5025
rs79407211	IgD- CD38dim AC	ebi-a-GCST90001438	0.00549868	20.2033
rs73178168	IgD- CD38dim AC	ebi-a-GCST90001438	0.00641591	23.5951
rs192544457	IgD- CD38dim AC	ebi-a-GCST90001438	0.00800946	29.5029
rs9520836	IgD- CD38dim AC	ebi-a-GCST90001438	0.00591934	21.7581
rs60035843	IgD- CD38dim AC	ebi-a-GCST90001438	0.00546526	20.0798
rs11653761	IgD- CD38dim AC	ebi-a-GCST90001438	0.00590747	21.7142
rs117605782	IgD- CD38dim AC	ebi-a-GCST90001438	0.00547346	20.1101
rs533086	IgD- CD38dim AC	ebi-a-GCST90001438	0.00563666	20.7131
rs78893742	IgD- CD38dim AC	ebi-a-GCST90001438	0.00587253	21.585
rs61788860	IgD+ CD24+ %lymphocyte	ebi-a-GCST90001439	0.00551801	20.2747
rs75766272	IgD+ CD24+ %lymphocyte	ebi-a-GCST90001439	0.00621173	22.8395
rs2015983	IgD+ CD24+ %lymphocyte	ebi-a-GCST90001439	0.00619294	22.77
rs6781675	IgD+ CD24+ %lymphocyte	ebi-a-GCST90001439	0.00553371	20.3327
rs1382818	IgD+ CD24+ %lymphocyte	ebi-a-GCST90001439	0.00550153	20.2138
rs4937689	IgD+ CD24+ %lymphocyte	ebi-a-GCST90001439	0.00536023	19.6918
rs183466766	IgD+ CD24+ %lymphocyte	ebi-a-GCST90001439	0.00658711	24.2289
rs12874404	IgD+ CD24+ %lymphocyte	ebi-a-GCST90001439	0.0210739	78.6619
rs141107540	IgD+ CD24+ %lymphocyte	ebi-a-GCST90001439	0.00552865	20.314
rs73192651	IgD+ CD24+ %lymphocyte	ebi-a-GCST90001439	0.00799629	29.454
rs77762131	IgD+ CD24+ %lymphocyte	ebi-a-GCST90001439	0.00781851	28.794
rs8014978	IgD+ CD24+ %lymphocyte	ebi-a-GCST90001439	0.00534807	19.6469
rs11657118	IgD+ CD24+ %lymphocyte	ebi-a-GCST90001439	0.00946512	34.916
rs7254039	IgD+ CD24+ %lymphocyte	ebi-a-GCST90001439	0.00555824	20.4233
rs3810559	IgD+ CD24+ %lymphocyte	ebi-a-GCST90001439	0.00546846	20.0916
rs6687573	IgD- CD24- %lymphocyte	ebi-a-GCST90001440	0.00562258	20.6611
rs55756125	IgD- CD24- %lymphocyte	ebi-a-GCST90001440	0.00610564	22.4471
rs111237501	IgD- CD24- %lymphocyte	ebi-a-GCST90001440	0.0053479	19.6463
rs11674994	IgD- CD24- %lymphocyte	ebi-a-GCST90001440	0.00541933	19.9101
rs72990172	IgD- CD24- %lymphocyte	ebi-a-GCST90001440	0.00617745	22.7127
rs76225955	IgD- CD24- %lymphocyte	ebi-a-GCST90001440	0.00536461	19.708
rs17044633	IgD- CD24- %lymphocyte	ebi-a-GCST90001440	0.00555005	20.3931
rs183821560	IgD- CD24- %lymphocyte	ebi-a-GCST90001440	0.00550523	20.2275
rs807894	IgD- CD24- %lymphocyte	ebi-a-GCST90001440	0.00595687	21.8968
rs9398107	IgD- CD24- %lymphocyte	ebi-a-GCST90001440	0.00636312	23.3997
rs75464772	IgD- CD24- %lymphocyte	ebi-a-GCST90001440	0.00580685	21.3421
rs6991364	IgD- CD24- %lymphocyte	ebi-a-GCST90001440	0.00566019	20.8001
rs146221269	IgD- CD24- %lymphocyte	ebi-a-GCST90001440	0.00553969	20.3548
rs73277142	IgD- CD24- %lymphocyte	ebi-a-GCST90001440	0.0062866	23.1166
rs11066272	IgD- CD24- %lymphocyte	ebi-a-GCST90001440	0.00537389	19.7423
rs139509958	IgD- CD24- %lymphocyte	ebi-a-GCST90001440	0.00562609	20.6741
rs191543445	IgD- CD24- %lymphocyte	ebi-a-GCST90001440	0.00550698	20.2339
rs17102161	IgD- CD24- %lymphocyte	ebi-a-GCST90001440	0.00556389	20.4442
rs496760	IgD- CD24- %lymphocyte	ebi-a-GCST90001440	0.00542935	19.9471
rs75150138	IgD- CD24- %lymphocyte	ebi-a-GCST90001440	0.00579106	21.2838
rs11862268	IgD- CD24- %lymphocyte	ebi-a-GCST90001440	0.00605442	22.2576
rs58904842	IgD- CD24- %lymphocyte	ebi-a-GCST90001440	0.00600045	22.058
rs30146	IgD- CD24- %lymphocyte	ebi-a-GCST90001440	0.00589858	21.6813
rs8098848	IgD- CD24- %lymphocyte	ebi-a-GCST90001440	0.0061018	22.4329
rs451367	IgD- CD24- %lymphocyte	ebi-a-GCST90001440	0.00535314	19.6657
rs16837671	IgD+ CD24- %lymphocyte	ebi-a-GCST90001441	0.00580785	21.3459
rs520786	IgD+ CD24- %lymphocyte	ebi-a-GCST90001441	0.00534888	19.6499
rs34712193	IgD+ CD24- %lymphocyte	ebi-a-GCST90001441	0.00633396	23.2918
rs17056318	IgD+ CD24- %lymphocyte	ebi-a-GCST90001441	0.00543272	19.9596
rs76845048	IgD+ CD24- %lymphocyte	ebi-a-GCST90001441	0.00550943	20.243
rs115204570	IgD+ CD24- %lymphocyte	ebi-a-GCST90001441	0.00567378	20.8503
rs140523784	IgD+ CD24- %lymphocyte	ebi-a-GCST90001441	0.00572781	21.05
rs9354413	IgD+ CD24- %lymphocyte	ebi-a-GCST90001441	0.0058811	21.6167
rs4361609	IgD+ CD24- %lymphocyte	ebi-a-GCST90001441	0.00706135	25.9857
rs111830700	IgD+ CD24- %lymphocyte	ebi-a-GCST90001441	0.00581975	21.3899
rs34910780	IgD+ CD24- %lymphocyte	ebi-a-GCST90001441	0.00670633	24.6704
rs12542190	IgD+ CD24- %lymphocyte	ebi-a-GCST90001441	0.00720896	26.5328
rs2978582	IgD+ CD24- %lymphocyte	ebi-a-GCST90001441	0.00555782	20.4218
rs533239981	IgD+ CD24- %lymphocyte	ebi-a-GCST90001441	0.0078395	28.8719
rs71483382	IgD+ CD24- %lymphocyte	ebi-a-GCST90001441	0.00551268	20.255
rs75319860	IgD+ CD24- %lymphocyte	ebi-a-GCST90001441	0.00540095	19.8423
rs76578043	IgD+ CD24- %lymphocyte	ebi-a-GCST90001441	0.00596979	21.9446
rs2994690	IgD+ CD24- %lymphocyte	ebi-a-GCST90001441	0.00588987	21.6491
rs116844769	IgD+ CD24- %lymphocyte	ebi-a-GCST90001441	0.00590356	21.6997
rs9900847	IgD+ CD24- %lymphocyte	ebi-a-GCST90001441	0.00579669	21.3046
rs12939565	IgD+ CD24- %lymphocyte	ebi-a-GCST90001441	0.00619432	22.7751
rs73426855	IgD+ CD24- %lymphocyte	ebi-a-GCST90001441	0.00553139	20.3241
rs4805840	IgD+ CD24- %lymphocyte	ebi-a-GCST90001441	0.00597656	21.9697
rs6131010	IgD+ CD24- %lymphocyte	ebi-a-GCST90001441	0.00673944	24.793
rs75766272	CD24+ CD27+ %lymphocyte	ebi-a-GCST90001442	0.00681543	25.0745
rs76720471	CD24+ CD27+ %lymphocyte	ebi-a-GCST90001442	0.00564048	20.7272
rs1519524	CD24+ CD27+ %lymphocyte	ebi-a-GCST90001442	0.00549262	20.1809
rs112542522	CD24+ CD27+ %lymphocyte	ebi-a-GCST90001442	0.00583614	21.4504
rs12636848	CD24+ CD27+ %lymphocyte	ebi-a-GCST90001442	0.00594244	21.8435
rs4689417	CD24+ CD27+ %lymphocyte	ebi-a-GCST90001442	0.00586993	21.5754
rs17708396	CD24+ CD27+ %lymphocyte	ebi-a-GCST90001442	0.00637984	23.4616
rs35057381	CD24+ CD27+ %lymphocyte	ebi-a-GCST90001442	0.00544965	20.0221
rs4076316	CD24+ CD27+ %lymphocyte	ebi-a-GCST90001442	0.00617636	22.7087
rs74505387	CD24+ CD27+ %lymphocyte	ebi-a-GCST90001442	0.0058756	21.5963
rs144625305	CD24+ CD27+ %lymphocyte	ebi-a-GCST90001442	0.00596162	21.9144
rs6997704	CD24+ CD27+ %lymphocyte	ebi-a-GCST90001442	0.00606539	22.2982
rs1332199	CD24+ CD27+ %lymphocyte	ebi-a-GCST90001442	0.00563725	20.7153
rs144440894	CD24+ CD27+ %lymphocyte	ebi-a-GCST90001442	0.00561954	20.6499
rs6486433	CD24+ CD27+ %lymphocyte	ebi-a-GCST90001442	0.00544134	19.9914
rs4763704	CD24+ CD27+ %lymphocyte	ebi-a-GCST90001442	0.00600501	22.0749
rs12829274	CD24+ CD27+ %lymphocyte	ebi-a-GCST90001442	0.00762004	28.0574
rs12874404	CD24+ CD27+ %lymphocyte	ebi-a-GCST90001442	0.0175749	65.3674
rs557577736	CD24+ CD27+ %lymphocyte	ebi-a-GCST90001442	0.00607313	22.3268
rs73192651	CD24+ CD27+ %lymphocyte	ebi-a-GCST90001442	0.00901311	33.2334
rs112782756	CD24+ CD27+ %lymphocyte	ebi-a-GCST90001442	0.00537627	19.7511
rs9578529	CD24+ CD27+ %lymphocyte	ebi-a-GCST90001442	0.00605231	22.2498
rs77762131	CD24+ CD27+ %lymphocyte	ebi-a-GCST90001442	0.00784593	28.8957
rs11657759	CD24+ CD27+ %lymphocyte	ebi-a-GCST90001442	0.00862677	31.7965
rs7254039	CD24+ CD27+ %lymphocyte	ebi-a-GCST90001442	0.00606706	22.3044
rs6712095	CD20- %lymphocyte	ebi-a-GCST90001443	0.00571488	21.0079
rs34625183	CD20- %lymphocyte	ebi-a-GCST90001443	0.00544246	20.001
rs75951284	CD20- %lymphocyte	ebi-a-GCST90001443	0.0055775	20.5001
rs186229706	CD20- %lymphocyte	ebi-a-GCST90001443	0.00579818	21.3159
rs4647601	CD20- %lymphocyte	ebi-a-GCST90001443	0.0054479	20.0212
rs72791978	CD20- %lymphocyte	ebi-a-GCST90001443	0.00544692	20.0175
rs9273241	CD20- %lymphocyte	ebi-a-GCST90001443	0.00747846	27.5397
rs7773849	CD20- %lymphocyte	ebi-a-GCST90001443	0.00802088	29.5534
rs13244540	CD20- %lymphocyte	ebi-a-GCST90001443	0.00555662	20.4229
rs38201	CD20- %lymphocyte	ebi-a-GCST90001443	0.00537434	19.7494
rs34313582	CD20- %lymphocyte	ebi-a-GCST90001443	0.00564545	20.7513
rs72825207	CD20- %lymphocyte	ebi-a-GCST90001443	0.00635202	23.365
rs147937648	CD20- %lymphocyte	ebi-a-GCST90001443	0.00594483	21.8583
rs77553819	CD20- %lymphocyte	ebi-a-GCST90001443	0.00594426	21.8562
rs12432015	CD20- %lymphocyte	ebi-a-GCST90001443	0.00572757	21.0549
rs4244568	CD20- %lymphocyte	ebi-a-GCST90001443	0.006169	22.6876
rs252294	CD20- %lymphocyte	ebi-a-GCST90001443	0.0054156	19.9018
rs4782702	CD20- %lymphocyte	ebi-a-GCST90001443	0.00592465	21.7836
rs11662133	CD20- %lymphocyte	ebi-a-GCST90001443	0.00554053	20.3635
rs186355283	CD20- %lymphocyte	ebi-a-GCST90001443	0.00541939	19.9158
rs6052993	CD20- %lymphocyte	ebi-a-GCST90001443	0.00576158	21.1806
rs75839951	CD20- CD38- %lymphocyte	ebi-a-GCST90001444	0.00606853	22.322
rs4619804	CD20- CD38- %lymphocyte	ebi-a-GCST90001444	0.00538759	19.8037
rs709082	CD20- CD38- %lymphocyte	ebi-a-GCST90001444	0.00558531	20.5346
rs2215848	CD20- CD38- %lymphocyte	ebi-a-GCST90001444	0.00547939	20.143
rs182720746	CD20- CD38- %lymphocyte	ebi-a-GCST90001444	0.00618817	22.7648
rs62311900	CD20- CD38- %lymphocyte	ebi-a-GCST90001444	0.00534822	19.6582
rs2339996	CD20- CD38- %lymphocyte	ebi-a-GCST90001444	0.00713405	26.2695
rs72492305	CD20- CD38- %lymphocyte	ebi-a-GCST90001444	0.00641706	23.6123
rs6906886	CD20- CD38- %lymphocyte	ebi-a-GCST90001444	0.00540463	19.8667
rs10279688	CD20- CD38- %lymphocyte	ebi-a-GCST90001444	0.00553521	20.3494
rs11203884	CD20- CD38- %lymphocyte	ebi-a-GCST90001444	0.00551354	20.2693
rs118073973	CD20- CD38- %lymphocyte	ebi-a-GCST90001444	0.00610608	22.461
rs55767134	CD20- CD38- %lymphocyte	ebi-a-GCST90001444	0.00576943	21.2154
rs308820	CD20- CD38- %lymphocyte	ebi-a-GCST90001444	0.00537191	19.7458
rs34666228	CD20- CD38- %lymphocyte	ebi-a-GCST90001444	0.0078141	28.7934
rs78301150	CD20- CD38- %lymphocyte	ebi-a-GCST90001444	0.0058198	21.4018
rs117308259	CD20- CD38- %lymphocyte	ebi-a-GCST90001444	0.00700186	25.7793
rs35639639	CD20- CD38- %lymphocyte	ebi-a-GCST90001444	0.00553049	20.3319
rs111737298	CD20- CD38- %lymphocyte	ebi-a-GCST90001444	0.00550509	20.238
rs16955339	CD20- CD38- %lymphocyte	ebi-a-GCST90001444	0.00660745	24.3175
rs77510701	CD20- CD38- %lymphocyte	ebi-a-GCST90001444	0.00580632	21.3519
rs80339814	CD20- CD38- %lymphocyte	ebi-a-GCST90001444	0.0061399	22.5861
rs6125184	CD20- CD38- %lymphocyte	ebi-a-GCST90001444	0.00602478	22.1601
rs59902361	CD20- CD38- %lymphocyte	ebi-a-GCST90001444	0.0056274	20.6902
rs36071180	CD20- CD38- %lymphocyte	ebi-a-GCST90001444	0.00591924	21.7696
rs61790670	IgD- CD38- %B cell	ebi-a-GCST90001445	0.00547674	20.1277
rs115576360	IgD- CD38- %B cell	ebi-a-GCST90001445	0.0054403	19.9931
rs4691920	IgD- CD38- %B cell	ebi-a-GCST90001445	0.0060386	22.2052
rs7726548	IgD- CD38- %B cell	ebi-a-GCST90001445	0.00601582	22.1209
rs17405603	IgD- CD38- %B cell	ebi-a-GCST90001445	0.00708014	26.0625
rs62417843	IgD- CD38- %B cell	ebi-a-GCST90001445	0.00597999	21.9883
rs9265864	IgD- CD38- %B cell	ebi-a-GCST90001445	0.00580472	21.3401
rs2450220	IgD- CD38- %B cell	ebi-a-GCST90001445	0.0074812	27.5499
rs140191306	IgD- CD38- %B cell	ebi-a-GCST90001445	0.00613587	22.5651
rs138977782	IgD- CD38- %B cell	ebi-a-GCST90001445	0.00539246	19.8163
rs11068290	IgD- CD38- %B cell	ebi-a-GCST90001445	0.00577186	21.2186
rs7994585	IgD- CD38- %B cell	ebi-a-GCST90001445	0.00569199	20.9233
rs7215243	IgD- CD38- %B cell	ebi-a-GCST90001445	0.00622413	22.8917
rs77146037	IgD- CD38- AC	ebi-a-GCST90001446	0.00570282	20.9576
rs61790670	IgD- CD38- AC	ebi-a-GCST90001446	0.00634035	23.3155
rs114551034	IgD- CD38- AC	ebi-a-GCST90001446	0.0069919	25.7283
rs115218350	IgD- CD38- AC	ebi-a-GCST90001446	0.00588441	21.6289
rs112964950	IgD- CD38- AC	ebi-a-GCST90001446	0.00534767	19.6454
rs75524570	IgD- CD38- AC	ebi-a-GCST90001446	0.00538766	19.7931
rs56741207	IgD- CD38- AC	ebi-a-GCST90001446	0.00671296	24.6949
rs4697617	IgD- CD38- AC	ebi-a-GCST90001446	0.00708998	26.0918
rs144625305	IgD- CD38- AC	ebi-a-GCST90001446	0.00538299	19.7759
rs62521107	IgD- CD38- AC	ebi-a-GCST90001446	0.00658301	24.2137
rs118121266	IgD- CD38- AC	ebi-a-GCST90001446	0.00558783	20.5327
rs79416092	IgD- CD38- AC	ebi-a-GCST90001446	0.00555713	20.4192
rs421516	IgD- CD38- AC	ebi-a-GCST90001446	0.00660221	24.2848
rs77741094	IgD- CD38- AC	ebi-a-GCST90001446	0.0083362	30.7165
rs144295598	IgD- CD38- AC	ebi-a-GCST90001446	0.00583057	21.4299
rs74907325	IgD+ CD38br %B cell	ebi-a-GCST90001447	0.00622022	22.8772
rs76084861	IgD+ CD38br %B cell	ebi-a-GCST90001447	0.0053569	19.6849
rs16867231	IgD+ CD38br %B cell	ebi-a-GCST90001447	0.00627813	23.0915
rs140380950	IgD+ CD38br %B cell	ebi-a-GCST90001447	0.00776844	28.6159
rs76112278	IgD+ CD38br %B cell	ebi-a-GCST90001447	0.00609335	22.4077
rs28393044	IgD+ CD38br %B cell	ebi-a-GCST90001447	0.00576861	21.2066
rs78658073	IgD+ CD38br %B cell	ebi-a-GCST90001447	0.0057747	21.2291
rs139996875	IgD+ CD38br %B cell	ebi-a-GCST90001447	0.00571221	20.9981
rs13196511	IgD+ CD38br %B cell	ebi-a-GCST90001447	0.0067327	24.7748
rs117772462	IgD+ CD38br %B cell	ebi-a-GCST90001447	0.00541997	19.918
rs17739715	IgD+ CD38br %B cell	ebi-a-GCST90001447	0.00535023	19.6603
rs17771512	IgD+ CD38br %B cell	ebi-a-GCST90001447	0.00554578	20.3829
rs57998613	IgD+ CD38br %B cell	ebi-a-GCST90001447	0.00555124	20.4031
rs28491938	IgD+ CD38br %B cell	ebi-a-GCST90001447	0.00538232	19.7788
rs11002952	IgD+ CD38br %B cell	ebi-a-GCST90001447	0.00554403	20.3764
rs2362966	IgD+ CD38br %B cell	ebi-a-GCST90001447	0.0064569	23.7533
rs35060907	IgD+ CD38br %B cell	ebi-a-GCST90001447	0.00639677	23.5307
rs61880664	IgD+ CD38br %B cell	ebi-a-GCST90001447	0.00541213	19.889
rs11068290	IgD+ CD38br %B cell	ebi-a-GCST90001447	0.00549883	20.2094
rs59879144	IgD+ CD38br %B cell	ebi-a-GCST90001447	0.00634782	23.3495
rs4903967	IgD+ CD38br %B cell	ebi-a-GCST90001447	0.0068046	25.0412
rs17278914	IgD+ CD38br %B cell	ebi-a-GCST90001447	0.00540064	19.8465
rs76840770	IgD+ CD38br %B cell	ebi-a-GCST90001447	0.00563903	20.7275
rs79487320	IgD+ CD38br %B cell	ebi-a-GCST90001447	0.0065859	24.231
rs147226531	IgD+ CD38br %B cell	ebi-a-GCST90001447	0.00549625	20.1998
rs2216762	IgD+ CD38br %B cell	ebi-a-GCST90001447	0.0060929	22.4061
rs8059803	IgD+ CD38br %B cell	ebi-a-GCST90001447	0.00609133	22.4003
rs72927038	IgD+ CD38br %B cell	ebi-a-GCST90001447	0.00641189	23.5867
rs114693598	CD11c+ monocyte AC	ebi-a-GCST90001448	0.00701026	21.3063
rs2404849	CD11c+ monocyte AC	ebi-a-GCST90001448	0.00866053	26.3658
rs72724781	CD11c+ monocyte AC	ebi-a-GCST90001448	0.00746778	22.7073
rs3040901	CD11c+ monocyte AC	ebi-a-GCST90001448	0.00701936	21.3342
rs74610143	CD11c+ monocyte AC	ebi-a-GCST90001448	0.00660176	20.0565
rs13104041	CD11c+ monocyte AC	ebi-a-GCST90001448	0.00650939	19.7741
rs72835655	CD11c+ monocyte AC	ebi-a-GCST90001448	0.00650454	19.7592
rs2295270	CD11c+ monocyte AC	ebi-a-GCST90001448	0.00646598	19.6413
rs151194174	CD11c+ monocyte AC	ebi-a-GCST90001448	0.00677286	20.5799
rs2587473	CD11c+ monocyte AC	ebi-a-GCST90001448	0.00694242	21.0987
rs72830905	CD11c+ monocyte AC	ebi-a-GCST90001448	0.00679238	20.6396
rs34936922	CD11c+ monocyte AC	ebi-a-GCST90001448	0.0064528	19.601
rs113800324	CD11c+ monocyte AC	ebi-a-GCST90001448	0.00657655	19.9794
rs9894233	CD11c+ monocyte AC	ebi-a-GCST90001448	0.00712336	21.6525
rs113451095	CD11c+ monocyte AC	ebi-a-GCST90001448	0.00740666	22.5201
rs73445777	CD11c+ monocyte AC	ebi-a-GCST90001448	0.00677139	20.5754
rs8175830	CD11c+ monocyte AC	ebi-a-GCST90001448	0.00653114	19.8406
rs150248455	CD11c+ monocyte AC	ebi-a-GCST90001448	0.00759258	23.0897
rs191730825	CD11c+ monocyte %monocyte	ebi-a-GCST90001449	0.00950607	29.1854
rs115058278	CD11c+ monocyte %monocyte	ebi-a-GCST90001449	0.00712756	21.8305
rs74610143	CD11c+ monocyte %monocyte	ebi-a-GCST90001449	0.00851877	26.1282
rs11921245	CD11c+ monocyte %monocyte	ebi-a-GCST90001449	0.00648821	19.8595
rs35237330	CD11c+ monocyte %monocyte	ebi-a-GCST90001449	0.00747775	22.9112
rs13186506	CD11c+ monocyte %monocyte	ebi-a-GCST90001449	0.00661606	20.2534
rs75256410	CD11c+ monocyte %monocyte	ebi-a-GCST90001449	0.00671055	20.5446
rs13241407	CD11c+ monocyte %monocyte	ebi-a-GCST90001449	0.00682957	20.9115
rs11766273	CD11c+ monocyte %monocyte	ebi-a-GCST90001449	0.00692471	21.2049
rs10227905	CD11c+ monocyte %monocyte	ebi-a-GCST90001449	0.00655152	20.0546
rs73073066	CD11c+ monocyte %monocyte	ebi-a-GCST90001449	0.0072896	22.3305
rs17689291	CD11c+ monocyte %monocyte	ebi-a-GCST90001449	0.00643709	19.702
rs4922033	CD11c+ monocyte %monocyte	ebi-a-GCST90001449	0.00659655	20.1933
rs703009	CD11c+ monocyte %monocyte	ebi-a-GCST90001449	0.00664039	20.3284
rs11610005	CD11c+ monocyte %monocyte	ebi-a-GCST90001449	0.00689371	21.1093
rs57566659	CD11c+ monocyte %monocyte	ebi-a-GCST90001449	0.00831228	25.4895
rs76968110	CD11c+ monocyte %monocyte	ebi-a-GCST90001449	0.00807448	24.7544
rs117909439	CD11c+ monocyte %monocyte	ebi-a-GCST90001449	0.00745711	22.8474
rs62002392	CD11c+ monocyte %monocyte	ebi-a-GCST90001449	0.0067687	20.7239
rs16952634	CD11c+ monocyte %monocyte	ebi-a-GCST90001449	0.00641429	19.6318
rs8065103	CD11c+ monocyte %monocyte	ebi-a-GCST90001449	0.00796957	24.4302
rs1381984	CD11c+ monocyte %monocyte	ebi-a-GCST90001449	0.00659809	20.1981
rs35149557	CD11c+ monocyte %monocyte	ebi-a-GCST90001449	0.00746308	22.8659
rs4656708	CD62L- monocyte AC	ebi-a-GCST90001450	0.0106936	32.6113
rs4987369	CD62L- monocyte AC	ebi-a-GCST90001450	0.0203082	62.54
rs62167331	CD62L- monocyte AC	ebi-a-GCST90001450	0.00710812	21.5987
rs13068785	CD62L- monocyte AC	ebi-a-GCST90001450	0.00692912	21.051
rs1907980	CD62L- monocyte AC	ebi-a-GCST90001450	0.00682037	20.7184
rs11935230	CD62L- monocyte AC	ebi-a-GCST90001450	0.00856423	26.0615
rs278949	CD62L- monocyte AC	ebi-a-GCST90001450	0.00667947	20.2875
rs17082777	CD62L- monocyte AC	ebi-a-GCST90001450	0.00667097	20.2615
rs11249570	CD62L- monocyte AC	ebi-a-GCST90001450	0.0109977	33.549
rs79930588	CD62L- monocyte AC	ebi-a-GCST90001450	0.00786078	23.9039
rs528135834	CD62L- monocyte AC	ebi-a-GCST90001450	0.00725328	22.043
rs4484736	CD62L- monocyte AC	ebi-a-GCST90001450	0.00696495	21.1606
rs530377	CD62L- monocyte AC	ebi-a-GCST90001450	0.00820287	24.9528
rs143153359	CD62L- monocyte AC	ebi-a-GCST90001450	0.00846071	25.7438
rs77287889	CD62L- monocyte AC	ebi-a-GCST90001450	0.00648899	19.7052
rs116691483	CD62L- monocyte AC	ebi-a-GCST90001450	0.00648813	19.7025
rs1800973	CD62L- monocyte AC	ebi-a-GCST90001450	0.00686122	20.8433
rs4899265	CD62L- monocyte AC	ebi-a-GCST90001450	0.00777414	23.6384
rs146793376	CD62L- monocyte AC	ebi-a-GCST90001450	0.00654736	19.8836
rs435806	CD62L- monocyte AC	ebi-a-GCST90001450	0.0067558	20.5209
rs149543954	CD62L- monocyte AC	ebi-a-GCST90001450	0.00766726	23.3109
rs4987360	CD62L- monocyte %monocyte	ebi-a-GCST90001451	0.0403776	127.913
rs4656708	CD62L- monocyte %monocyte	ebi-a-GCST90001451	0.00842038	25.8153
rs141287837	CD62L- monocyte %monocyte	ebi-a-GCST90001451	0.00645809	19.7602
rs11694457	CD62L- monocyte %monocyte	ebi-a-GCST90001451	0.00643724	19.696
rs9824107	CD62L- monocyte %monocyte	ebi-a-GCST90001451	0.00674985	20.659
rs62236339	CD62L- monocyte %monocyte	ebi-a-GCST90001451	0.00667458	20.4271
rs9859349	CD62L- monocyte %monocyte	ebi-a-GCST90001451	0.00973506	29.8855
rs36141595	CD62L- monocyte %monocyte	ebi-a-GCST90001451	0.00730377	22.3668
rs1816932	CD62L- monocyte %monocyte	ebi-a-GCST90001451	0.00799913	24.5135
rs17624563	CD62L- monocyte %monocyte	ebi-a-GCST90001451	0.00826948	25.3489
rs11249570	CD62L- monocyte %monocyte	ebi-a-GCST90001451	0.00812675	24.9077
rs2399610	CD62L- monocyte %monocyte	ebi-a-GCST90001451	0.00763597	23.392
rs76717104	CD62L- monocyte %monocyte	ebi-a-GCST90001451	0.00661278	20.2367
rs717824	CD62L- monocyte %monocyte	ebi-a-GCST90001451	0.00657994	20.1355
rs2124027	CD62L- monocyte %monocyte	ebi-a-GCST90001451	0.00667543	20.4297
rs530377	CD62L- monocyte %monocyte	ebi-a-GCST90001451	0.00803238	24.6162
rs117765367	CD62L- monocyte %monocyte	ebi-a-GCST90001451	0.00640689	19.6025
rs7139370	CD62L- monocyte %monocyte	ebi-a-GCST90001451	0.00973143	29.8743
rs117309559	CD62L- monocyte %monocyte	ebi-a-GCST90001451	0.00737454	22.5852
rs4899389	CD62L- monocyte %monocyte	ebi-a-GCST90001451	0.00767838	23.5229
rs45487297	CD62L- monocyte %monocyte	ebi-a-GCST90001451	0.00989793	30.3905
rs7150584	CD62L- monocyte %monocyte	ebi-a-GCST90001451	0.00783503	24.0066
rs9807014	CD62L- monocyte %monocyte	ebi-a-GCST90001451	0.00874807	26.8288
rs9944612	CD62L- monocyte %monocyte	ebi-a-GCST90001451	0.00679272	20.7911
rs55859756	CD62L- monocyte %monocyte	ebi-a-GCST90001451	0.00646162	19.7711
rs2404849	CD11c+ CD62L- monocyte AC	ebi-a-GCST90001452	0.00855266	26.0087
rs1407142	CD11c+ CD62L- monocyte AC	ebi-a-GCST90001452	0.0064606	19.6054
rs55971447	CD11c+ CD62L- monocyte AC	ebi-a-GCST90001452	0.0112758	34.3843
rs72660177	CD11c+ CD62L- monocyte AC	ebi-a-GCST90001452	0.00709295	21.538
rs72724781	CD11c+ CD62L- monocyte AC	ebi-a-GCST90001452	0.00732794	22.2568
rs3040901	CD11c+ CD62L- monocyte AC	ebi-a-GCST90001452	0.00724701	22.0092
rs13104041	CD11c+ CD62L- monocyte AC	ebi-a-GCST90001452	0.00682382	20.7152
rs72835655	CD11c+ CD62L- monocyte AC	ebi-a-GCST90001452	0.00650467	19.74
rs75220521	CD11c+ CD62L- monocyte AC	ebi-a-GCST90001452	0.00721711	21.9178
rs11772116	CD11c+ CD62L- monocyte AC	ebi-a-GCST90001452	0.00701966	21.3139
rs1268974	CD11c+ CD62L- monocyte AC	ebi-a-GCST90001452	0.00681744	20.6957
rs11213272	CD11c+ CD62L- monocyte AC	ebi-a-GCST90001452	0.00657701	19.961
rs12277397	CD11c+ CD62L- monocyte AC	ebi-a-GCST90001452	0.00686184	20.8314
rs10891433	CD11c+ CD62L- monocyte AC	ebi-a-GCST90001452	0.00658686	19.9911
rs76524078	CD11c+ CD62L- monocyte AC	ebi-a-GCST90001452	0.00699064	21.2251
rs113800324	CD11c+ CD62L- monocyte AC	ebi-a-GCST90001452	0.00902832	27.4684
rs17474599	CD11c+ CD62L- monocyte AC	ebi-a-GCST90001452	0.00754047	22.9073
rs77694582	CD11c+ CD62L- monocyte AC	ebi-a-GCST90001452	0.00661776	20.0855
rs4899265	CD11c+ CD62L- monocyte AC	ebi-a-GCST90001452	0.00671928	20.3957
rs4359381	CD11c+ CD62L- monocyte AC	ebi-a-GCST90001452	0.00692522	21.0251
rs12708874	CD11c+ CD62L- monocyte AC	ebi-a-GCST90001452	0.00720157	21.8702
rs9894233	CD11c+ CD62L- monocyte AC	ebi-a-GCST90001452	0.0077094	23.4244
rs34142458	CD11c+ CD62L- monocyte AC	ebi-a-GCST90001452	0.0067254	20.4144
rs150248455	CD11c+ CD62L- monocyte AC	ebi-a-GCST90001452	0.00738218	22.4228
rs117545845	CD11c+ CD62L- monocyte AC	ebi-a-GCST90001452	0.00664784	20.1774
rs116249234	CD11c+ CD62L- monocyte %monocyte	ebi-a-GCST90001453	0.00643836	19.6865
rs80087840	CD11c+ CD62L- monocyte %monocyte	ebi-a-GCST90001453	0.00691241	21.1461
rs191730825	CD11c+ CD62L- monocyte %monocyte	ebi-a-GCST90001453	0.00731838	22.3972
rs10924239	CD11c+ CD62L- monocyte %monocyte	ebi-a-GCST90001453	0.00705177	21.5754
rs114693598	CD11c+ CD62L- monocyte %monocyte	ebi-a-GCST90001453	0.00831657	25.4776
rs114857887	CD11c+ CD62L- monocyte %monocyte	ebi-a-GCST90001453	0.00677471	20.722
rs10804278	CD11c+ CD62L- monocyte %monocyte	ebi-a-GCST90001453	0.00672515	20.5693
rs74610143	CD11c+ CD62L- monocyte %monocyte	ebi-a-GCST90001453	0.00726212	22.2237
rs11921245	CD11c+ CD62L- monocyte %monocyte	ebi-a-GCST90001453	0.00659033	20.1543
rs138567833	CD11c+ CD62L- monocyte %monocyte	ebi-a-GCST90001453	0.00702429	21.4908
rs13241407	CD11c+ CD62L- monocyte %monocyte	ebi-a-GCST90001453	0.00660289	20.1929
rs73073066	CD11c+ CD62L- monocyte %monocyte	ebi-a-GCST90001453	0.00851515	26.0912
rs4922033	CD11c+ CD62L- monocyte %monocyte	ebi-a-GCST90001453	0.00661068	20.2169
rs1469503	CD11c+ CD62L- monocyte %monocyte	ebi-a-GCST90001453	0.00698444	21.368
rs57566659	CD11c+ CD62L- monocyte %monocyte	ebi-a-GCST90001453	0.00771763	23.6285
rs1800973	CD11c+ CD62L- monocyte %monocyte	ebi-a-GCST90001453	0.00882247	27.0412
rs11610005	CD11c+ CD62L- monocyte %monocyte	ebi-a-GCST90001453	0.00739205	22.6243
rs117909439	CD11c+ CD62L- monocyte %monocyte	ebi-a-GCST90001453	0.00651818	19.9321
rs62002392	CD11c+ CD62L- monocyte %monocyte	ebi-a-GCST90001453	0.00712415	21.7985
rs16952634	CD11c+ CD62L- monocyte %monocyte	ebi-a-GCST90001453	0.00655206	20.0364
rs4468691	CD11c+ CD62L- monocyte %monocyte	ebi-a-GCST90001453	0.00790108	24.1946
rs74805957	CD62L- HLA DR++ monocyte AC	ebi-a-GCST90001454	0.00677809	20.5822
rs115431394	CD62L- HLA DR++ monocyte AC	ebi-a-GCST90001454	0.00656875	19.9423
rs1320172	CD62L- HLA DR++ monocyte AC	ebi-a-GCST90001454	0.00645058	19.5813
rs111224423	CD62L- HLA DR++ monocyte AC	ebi-a-GCST90001454	0.00651186	19.7685
rs7437802	CD62L- HLA DR++ monocyte AC	ebi-a-GCST90001454	0.0065371	19.8456
rs3797612	CD62L- HLA DR++ monocyte AC	ebi-a-GCST90001454	0.00647359	19.6516
rs10948829	CD62L- HLA DR++ monocyte AC	ebi-a-GCST90001454	0.00673191	20.4411
rs10759491	CD62L- HLA DR++ monocyte AC	ebi-a-GCST90001454	0.00652779	19.8172
rs10980077	CD62L- HLA DR++ monocyte AC	ebi-a-GCST90001454	0.00677463	20.5717
rs10887149	CD62L- HLA DR++ monocyte AC	ebi-a-GCST90001454	0.00656143	19.92
rs28680389	CD62L- HLA DR++ monocyte AC	ebi-a-GCST90001454	0.00765427	23.2634
rs938447	CD62L- HLA DR++ monocyte AC	ebi-a-GCST90001454	0.0081267	24.7109
rs148420500	CD62L- HLA DR++ monocyte AC	ebi-a-GCST90001454	0.00723526	21.9806
rs4899265	CD62L- HLA DR++ monocyte AC	ebi-a-GCST90001454	0.00693915	21.0747
rs139554006	CD62L- HLA DR++ monocyte AC	ebi-a-GCST90001454	0.0074118	22.5209
rs144348353	CD62L- HLA DR++ monocyte AC	ebi-a-GCST90001454	0.00673249	20.4428
rs7190107	CD62L- HLA DR++ monocyte AC	ebi-a-GCST90001454	0.00665941	20.2194
rs2240899	CD62L- HLA DR++ monocyte AC	ebi-a-GCST90001454	0.00651538	19.7793
rs117545845	CD62L- HLA DR++ monocyte AC	ebi-a-GCST90001454	0.00833114	25.3378
rs76234991	CD62L- HLA DR++ monocyte %monocyte	ebi-a-GCST90001455	0.00643838	19.693
rs9919190	CD62L- HLA DR++ monocyte %monocyte	ebi-a-GCST90001455	0.0067637	20.6949
rs4668750	CD62L- HLA DR++ monocyte %monocyte	ebi-a-GCST90001455	0.00723083	22.1345
rs6430066	CD62L- HLA DR++ monocyte %monocyte	ebi-a-GCST90001455	0.00639908	19.5721
rs356651	CD62L- HLA DR++ monocyte %monocyte	ebi-a-GCST90001455	0.00672762	20.5837
rs2955643	CD62L- HLA DR++ monocyte %monocyte	ebi-a-GCST90001455	0.00733355	22.4513
rs12485444	CD62L- HLA DR++ monocyte %monocyte	ebi-a-GCST90001455	0.00751531	23.012
rs151240896	CD62L- HLA DR++ monocyte %monocyte	ebi-a-GCST90001455	0.0076133	23.3143
rs189575603	CD62L- HLA DR++ monocyte %monocyte	ebi-a-GCST90001455	0.0073105	22.3802
rs111224423	CD62L- HLA DR++ monocyte %monocyte	ebi-a-GCST90001455	0.00652418	19.9572
rs11766800	CD62L- HLA DR++ monocyte %monocyte	ebi-a-GCST90001455	0.00679685	20.797
rs1969797	CD62L- HLA DR++ monocyte %monocyte	ebi-a-GCST90001455	0.00689725	21.1063
rs78736203	CD62L- HLA DR++ monocyte %monocyte	ebi-a-GCST90001455	0.00666661	20.3958
rs35079623	CD62L- HLA DR++ monocyte %monocyte	ebi-a-GCST90001455	0.0071891	22.0059
rs765044	CD62L- HLA DR++ monocyte %monocyte	ebi-a-GCST90001455	0.00762365	23.3463
rs5761319	CD62L- HLA DR++ monocyte %monocyte	ebi-a-GCST90001455	0.00809361	24.7972
rs506388	CD11c+ HLA DR++ monocyte AC	ebi-a-GCST90001456	0.00661365	20.0862
rs561934182	CD11c+ HLA DR++ monocyte AC	ebi-a-GCST90001456	0.0070891	21.5405
rs56186608	CD11c+ HLA DR++ monocyte AC	ebi-a-GCST90001456	0.00677407	20.5768
rs72660177	CD11c+ HLA DR++ monocyte AC	ebi-a-GCST90001456	0.00665682	20.2182
rs2404849	CD11c+ HLA DR++ monocyte AC	ebi-a-GCST90001456	0.00752082	22.8623
rs116484930	CD11c+ HLA DR++ monocyte AC	ebi-a-GCST90001456	0.00685361	20.82
rs6808893	CD11c+ HLA DR++ monocyte AC	ebi-a-GCST90001456	0.00737073	22.4026
rs548306594	CD11c+ HLA DR++ monocyte AC	ebi-a-GCST90001456	0.00738809	22.4558
rs74610143	CD11c+ HLA DR++ monocyte AC	ebi-a-GCST90001456	0.0070403	21.3912
rs55651060	CD11c+ HLA DR++ monocyte AC	ebi-a-GCST90001456	0.00755493	22.9667
rs2295270	CD11c+ HLA DR++ monocyte AC	ebi-a-GCST90001456	0.00748144	22.7416
rs151194174	CD11c+ HLA DR++ monocyte AC	ebi-a-GCST90001456	0.00748401	22.7495
rs2587473	CD11c+ HLA DR++ monocyte AC	ebi-a-GCST90001456	0.00840649	25.5774
rs12277397	CD11c+ HLA DR++ monocyte AC	ebi-a-GCST90001456	0.00701855	21.3246
rs112353331	CD11c+ HLA DR++ monocyte AC	ebi-a-GCST90001456	0.00665965	20.2269
rs148420500	CD11c+ HLA DR++ monocyte AC	ebi-a-GCST90001456	0.00666929	20.2564
rs9894233	CD11c+ HLA DR++ monocyte AC	ebi-a-GCST90001456	0.0065472	19.8831
rs76376209	CD11c+ HLA DR++ monocyte AC	ebi-a-GCST90001456	0.006503	19.748
rs117545845	CD11c+ HLA DR++ monocyte AC	ebi-a-GCST90001456	0.00727561	22.1114
rs77361483	CD11c+ HLA DR++ monocyte %monocyte	ebi-a-GCST90001457	0.00690154	21.1265
rs191730825	CD11c+ HLA DR++ monocyte %monocyte	ebi-a-GCST90001457	0.00685919	20.9959
rs6808893	CD11c+ HLA DR++ monocyte %monocyte	ebi-a-GCST90001457	0.0108476	33.3383
rs74610143	CD11c+ HLA DR++ monocyte %monocyte	ebi-a-GCST90001457	0.00914362	28.0531
rs76838015	CD11c+ HLA DR++ monocyte %monocyte	ebi-a-GCST90001457	0.00647571	19.8145
rs35237330	CD11c+ HLA DR++ monocyte %monocyte	ebi-a-GCST90001457	0.00843877	25.8722
rs6942832	CD11c+ HLA DR++ monocyte %monocyte	ebi-a-GCST90001457	0.0067837	20.7633
rs78175301	CD11c+ HLA DR++ monocyte %monocyte	ebi-a-GCST90001457	0.00700114	21.4335
rs11785252	CD11c+ HLA DR++ monocyte %monocyte	ebi-a-GCST90001457	0.00730364	22.3664
rs2587473	CD11c+ HLA DR++ monocyte %monocyte	ebi-a-GCST90001457	0.00649618	19.8775
rs1469503	CD11c+ HLA DR++ monocyte %monocyte	ebi-a-GCST90001457	0.00719183	22.0215
rs117853201	CD11c+ HLA DR++ monocyte %monocyte	ebi-a-GCST90001457	0.00667047	20.4144
rs7101558	CD11c+ HLA DR++ monocyte %monocyte	ebi-a-GCST90001457	0.00710534	21.7548
rs76968110	CD11c+ HLA DR++ monocyte %monocyte	ebi-a-GCST90001457	0.0069753	21.3539
rs9897015	CD11c+ HLA DR++ monocyte %monocyte	ebi-a-GCST90001457	0.00703591	21.5407
rs76376209	CD11c+ HLA DR++ monocyte %monocyte	ebi-a-GCST90001457	0.00748856	22.937
rs6038180	CD11c+ HLA DR++ monocyte %monocyte	ebi-a-GCST90001457	0.00658016	20.1362
rs143643742	CD11c+ HLA DR++ monocyte %monocyte	ebi-a-GCST90001457	0.00657784	20.129
rs141320646	Myeloid DC AC	ebi-a-GCST90001458	0.00660954	22.5221
rs115805162	Myeloid DC AC	ebi-a-GCST90001458	0.0143193	49.1749
rs71632979	Myeloid DC AC	ebi-a-GCST90001458	0.139204	547.407
rs147678401	Myeloid DC AC	ebi-a-GCST90001458	0.0076037	25.9357
rs569911	Myeloid DC AC	ebi-a-GCST90001458	0.0100005	34.1938
rs142472859	Myeloid DC AC	ebi-a-GCST90001458	0.00691451	23.5686
rs17017403	Myeloid DC AC	ebi-a-GCST90001458	0.00638789	21.762
rs72794768	Myeloid DC AC	ebi-a-GCST90001458	0.00657719	22.4112
rs115389169	Myeloid DC AC	ebi-a-GCST90001458	0.00598344	20.3759
rs4681269	Myeloid DC AC	ebi-a-GCST90001458	0.00587086	19.9902
rs17036497	Myeloid DC AC	ebi-a-GCST90001458	0.00594444	20.2423
rs79275634	Myeloid DC AC	ebi-a-GCST90001458	0.00604221	20.5772
rs76168011	Myeloid DC AC	ebi-a-GCST90001458	0.00601067	20.4691
rs62504404	Myeloid DC AC	ebi-a-GCST90001458	0.00670557	22.8516
rs16938204	Myeloid DC AC	ebi-a-GCST90001458	0.00650113	22.1503
rs138949944	Myeloid DC AC	ebi-a-GCST90001458	0.00610053	20.7771
rs10746769	Myeloid DC AC	ebi-a-GCST90001458	0.00585746	19.9443
rs10763776	Myeloid DC AC	ebi-a-GCST90001458	0.00589	20.0558
rs17711429	Myeloid DC AC	ebi-a-GCST90001458	0.0057718	19.651
rs206131	Myeloid DC AC	ebi-a-GCST90001458	0.005918	20.1517
rs1664690	Myeloid DC AC	ebi-a-GCST90001458	0.00575058	19.5783
rs147711004	Myeloid DC AC	ebi-a-GCST90001458	0.00587495	20.0042
rs6048352	Myeloid DC AC	ebi-a-GCST90001458	0.00639141	21.7741
rs147431504	Myeloid DC AC	ebi-a-GCST90001458	0.0063091	21.4919
rs143140559	Myeloid DC %DC	ebi-a-GCST90001459	0.00729601	25.0475
rs71639910	Myeloid DC %DC	ebi-a-GCST90001459	0.00703812	24.1559
rs71632979	Myeloid DC %DC	ebi-a-GCST90001459	0.122367	475.174
rs74341264	Myeloid DC %DC	ebi-a-GCST90001459	0.0123419	42.5869
rs66730637	Myeloid DC %DC	ebi-a-GCST90001459	0.00629625	21.5936
rs142472859	Myeloid DC %DC	ebi-a-GCST90001459	0.0058292	19.9824
rs7577824	Myeloid DC %DC	ebi-a-GCST90001459	0.00656882	22.5346
rs141267173	Myeloid DC %DC	ebi-a-GCST90001459	0.006002	20.5783
rs11715127	Myeloid DC %DC	ebi-a-GCST90001459	0.00609563	20.9013
rs62272723	Myeloid DC %DC	ebi-a-GCST90001459	0.0071746	24.6277
rs114586806	Myeloid DC %DC	ebi-a-GCST90001459	0.00638891	21.9134
rs196051	Myeloid DC %DC	ebi-a-GCST90001459	0.00575182	19.7156
rs78726632	Myeloid DC %DC	ebi-a-GCST90001459	0.00648959	22.261
rs876036	Myeloid DC %DC	ebi-a-GCST90001459	0.00832242	28.6008
rs4921823	Myeloid DC %DC	ebi-a-GCST90001459	0.00650437	22.312
rs34547718	Myeloid DC %DC	ebi-a-GCST90001459	0.00701283	24.0685
rs17767335	Myeloid DC %DC	ebi-a-GCST90001459	0.00608476	20.8638
rs1571857	Myeloid DC %DC	ebi-a-GCST90001459	0.00579763	19.8735
rs145330472	Myeloid DC %DC	ebi-a-GCST90001459	0.00616459	21.1392
rs1330145	Myeloid DC %DC	ebi-a-GCST90001459	0.006174	21.1717
rs4752481	Myeloid DC %DC	ebi-a-GCST90001459	0.00697398	23.9342
rs10735429	Myeloid DC %DC	ebi-a-GCST90001459	0.00606179	20.7846
rs73180904	Myeloid DC %DC	ebi-a-GCST90001459	0.0059719	20.4745
rs79691782	Myeloid DC %DC	ebi-a-GCST90001459	0.00602738	20.6659
rs79631949	Myeloid DC %DC	ebi-a-GCST90001459	0.00584976	20.0533
rs73064521	Myeloid DC %DC	ebi-a-GCST90001459	0.00593857	20.3596
rs6079813	Myeloid DC %DC	ebi-a-GCST90001459	0.00615927	21.1209
rs12628370	Myeloid DC %DC	ebi-a-GCST90001459	0.0063189	21.6717
rs6751072	Plasmacytoid DC AC	ebi-a-GCST90001460	0.00586609	19.8972
rs6708784	Plasmacytoid DC AC	ebi-a-GCST90001460	0.00694808	23.5928
rs12616455	Plasmacytoid DC AC	ebi-a-GCST90001460	0.0074051	25.1563
rs7560153	Plasmacytoid DC AC	ebi-a-GCST90001460	0.00601048	20.3899
rs115638174	Plasmacytoid DC AC	ebi-a-GCST90001460	0.00680776	23.1131
rs2164210	Plasmacytoid DC AC	ebi-a-GCST90001460	0.0158462	54.2939
rs192992420	Plasmacytoid DC AC	ebi-a-GCST90001460	0.00598474	20.302
rs77908862	Plasmacytoid DC AC	ebi-a-GCST90001460	0.00673546	22.866
rs2545798	Plasmacytoid DC AC	ebi-a-GCST90001460	0.00703332	23.8843
rs62354582	Plasmacytoid DC AC	ebi-a-GCST90001460	0.00825908	28.0815
rs144152085	Plasmacytoid DC AC	ebi-a-GCST90001460	0.0062613	21.2461
rs73064418	Plasmacytoid DC AC	ebi-a-GCST90001460	0.00608485	20.6437
rs186765793	Plasmacytoid DC AC	ebi-a-GCST90001460	0.00622699	21.129
rs876039	Plasmacytoid DC AC	ebi-a-GCST90001460	0.0149754	51.2648
rs117039412	Plasmacytoid DC AC	ebi-a-GCST90001460	0.00691169	23.4684
rs11776881	Plasmacytoid DC AC	ebi-a-GCST90001460	0.00642215	21.7955
rs2862050	Plasmacytoid DC AC	ebi-a-GCST90001460	0.00648156	21.9984
rs17108993	Plasmacytoid DC AC	ebi-a-GCST90001460	0.00583139	19.7788
rs55901425	Plasmacytoid DC AC	ebi-a-GCST90001460	0.00631266	21.4215
rs117839924	Plasmacytoid DC AC	ebi-a-GCST90001460	0.00606832	20.5873
rs117112573	Plasmacytoid DC AC	ebi-a-GCST90001460	0.00607973	20.6262
rs17582557	Plasmacytoid DC AC	ebi-a-GCST90001460	0.00654151	22.2032
rs76924856	Plasmacytoid DC AC	ebi-a-GCST90001460	0.00593899	20.1459
rs217667	Plasmacytoid DC AC	ebi-a-GCST90001460	0.00686935	23.3237
rs138423727	Plasmacytoid DC AC	ebi-a-GCST90001460	0.00609727	20.6861
rs142129101	Plasmacytoid DC AC	ebi-a-GCST90001460	0.00607186	20.5994
rs147983983	Plasmacytoid DC AC	ebi-a-GCST90001460	0.0059949	20.3367
rs16977238	Plasmacytoid DC AC	ebi-a-GCST90001460	0.0058887	19.9743
rs16944211	Plasmacytoid DC AC	ebi-a-GCST90001460	0.00778504	26.4571
rs117990934	Plasmacytoid DC AC	ebi-a-GCST90001460	0.00596044	20.2191
rs10853636	Plasmacytoid DC AC	ebi-a-GCST90001460	0.00650068	22.0637
rs191217950	DC AC	ebi-a-GCST90001461	0.00823481	27.9983
rs911228	DC AC	ebi-a-GCST90001461	0.00642455	21.8036
rs55971447	DC AC	ebi-a-GCST90001461	0.112611	427.913
rs75072970	DC AC	ebi-a-GCST90001461	0.0110179	37.5664
rs12144062	DC AC	ebi-a-GCST90001461	0.00589468	19.9947
rs17438107	DC AC	ebi-a-GCST90001461	0.00606866	20.5885
rs2322660	DC AC	ebi-a-GCST90001461	0.00607505	20.6103
rs17017403	DC AC	ebi-a-GCST90001461	0.00619496	21.0196
rs7355664	DC AC	ebi-a-GCST90001461	0.00626893	21.2722
rs6782857	DC AC	ebi-a-GCST90001461	0.00608101	20.6306
rs115751481	DC AC	ebi-a-GCST90001461	0.00630495	21.3952
rs11748731	DC AC	ebi-a-GCST90001461	0.00631959	21.4452
rs79275634	DC AC	ebi-a-GCST90001461	0.00668064	22.6786
rs2490034	DC AC	ebi-a-GCST90001461	0.00620655	21.0592
rs76168011	DC AC	ebi-a-GCST90001461	0.00578247	19.6119
rs35802809	DC AC	ebi-a-GCST90001461	0.00605869	20.5544
rs28854187	DC AC	ebi-a-GCST90001461	0.00656014	22.2669
rs62504404	DC AC	ebi-a-GCST90001461	0.00740795	25.1661
rs138192280	DC AC	ebi-a-GCST90001461	0.00622759	21.131
rs142917473	DC AC	ebi-a-GCST90001461	0.00670643	22.7668
rs9590896	DC AC	ebi-a-GCST90001461	0.00578759	19.6294
rs115102594	DC AC	ebi-a-GCST90001461	0.00636859	21.6125
rs147431504	DC AC	ebi-a-GCST90001461	0.0064871	22.0173
rs74341264	CD62L- DC AC	ebi-a-GCST90001462	0.0253116	87.9049
rs143140559	CD62L- DC AC	ebi-a-GCST90001462	0.0097582	33.357
rs71632979	CD62L- DC AC	ebi-a-GCST90001462	0.182635	756.356
rs147678401	CD62L- DC AC	ebi-a-GCST90001462	0.00800166	27.3041
rs71639910	CD62L- DC AC	ebi-a-GCST90001462	0.0144933	49.7812
rs17438107	CD62L- DC AC	ebi-a-GCST90001462	0.00635105	21.6357
rs75055130	CD62L- DC AC	ebi-a-GCST90001462	0.006351	21.6356
rs9855547	CD62L- DC AC	ebi-a-GCST90001462	0.00582576	19.8357
rs35740507	CD62L- DC AC	ebi-a-GCST90001462	0.00658602	22.4415
rs139894456	CD62L- DC AC	ebi-a-GCST90001462	0.00612039	20.8451
rs771894	CD62L- DC AC	ebi-a-GCST90001462	0.00574854	19.5713
rs116910026	CD62L- DC AC	ebi-a-GCST90001462	0.00698957	23.8262
rs149812305	CD62L- DC AC	ebi-a-GCST90001462	0.00666792	22.7224
rs73231298	CD62L- DC AC	ebi-a-GCST90001462	0.00669154	22.8034
rs35519924	CD62L- DC AC	ebi-a-GCST90001462	0.00641128	21.8422
rs151030554	CD62L- DC AC	ebi-a-GCST90001462	0.00594718	20.2516
rs139058442	CD62L- DC AC	ebi-a-GCST90001462	0.00574865	19.5717
rs112701148	CD62L- DC AC	ebi-a-GCST90001462	0.00589173	20.0617
rs6048352	CD62L- DC AC	ebi-a-GCST90001462	0.00590799	20.1174
rs1515318	CD62L- DC %DC	ebi-a-GCST90001463	0.00651579	22.3515
rs143140559	CD62L- DC %DC	ebi-a-GCST90001463	0.00736025	25.2697
rs74341264	CD62L- DC %DC	ebi-a-GCST90001463	0.026335	92.1772
rs143032729	CD62L- DC %DC	ebi-a-GCST90001463	0.00880666	30.2798
rs6537835	CD62L- DC %DC	ebi-a-GCST90001463	0.00905922	31.1561
rs79979402	CD62L- DC %DC	ebi-a-GCST90001463	0.00602847	20.6696
rs341029	CD62L- DC %DC	ebi-a-GCST90001463	0.00633183	21.7164
rs56199187	CD62L- DC %DC	ebi-a-GCST90001463	0.174741	721.615
rs4680245	CD62L- DC %DC	ebi-a-GCST90001463	0.00592254	20.3043
rs112985320	CD62L- DC %DC	ebi-a-GCST90001463	0.00601614	20.6271
rs62300075	CD62L- DC %DC	ebi-a-GCST90001463	0.00761353	26.146
rs116473196	CD62L- DC %DC	ebi-a-GCST90001463	0.00644133	22.0944
rs75220521	CD62L- DC %DC	ebi-a-GCST90001463	0.00628799	21.5651
rs11754319	CD62L- DC %DC	ebi-a-GCST90001463	0.00586345	20.1005
rs78548019	CD62L- DC %DC	ebi-a-GCST90001463	0.00589772	20.2187
rs702185	CD62L- DC %DC	ebi-a-GCST90001463	0.0061624	21.1317
rs138315340	CD62L- DC %DC	ebi-a-GCST90001463	0.00580857	19.9113
rs41275192	CD62L- DC %DC	ebi-a-GCST90001463	0.00585897	20.085
rs149812305	CD62L- DC %DC	ebi-a-GCST90001463	0.00640223	21.9594
rs2332920	CD62L- DC %DC	ebi-a-GCST90001463	0.00595334	20.4105
rs7163051	CD62L- DC %DC	ebi-a-GCST90001463	0.00616779	21.1503
rs148188224	CD62L- DC %DC	ebi-a-GCST90001463	0.00623077	21.3676
rs2024391	CD62L- DC %DC	ebi-a-GCST90001463	0.00635369	21.7918
rs5767014	CD62L- DC %DC	ebi-a-GCST90001463	0.00577798	19.8058
rs72711599	CD86+ myeloid DC AC	ebi-a-GCST90001464	0.00644015	21.9412
rs12134798	CD86+ myeloid DC AC	ebi-a-GCST90001464	0.00654009	22.2839
rs147678401	CD86+ myeloid DC AC	ebi-a-GCST90001464	0.00689223	23.4921
rs139939515	CD86+ myeloid DC AC	ebi-a-GCST90001464	0.00658092	22.424
rs71639910	CD86+ myeloid DC AC	ebi-a-GCST90001464	0.0144427	49.6048
rs6656063	CD86+ myeloid DC AC	ebi-a-GCST90001464	0.00662585	22.5781
rs71632979	CD86+ myeloid DC AC	ebi-a-GCST90001464	0.199366	842.899
rs113995133	CD86+ myeloid DC AC	ebi-a-GCST90001464	0.00651923	22.2124
rs3789359	CD86+ myeloid DC AC	ebi-a-GCST90001464	0.00601717	20.4914
rs74341264	CD86+ myeloid DC AC	ebi-a-GCST90001464	0.0226603	78.4835
rs143140559	CD86+ myeloid DC AC	ebi-a-GCST90001464	0.00939585	32.1066
rs115849513	CD86+ myeloid DC AC	ebi-a-GCST90001464	0.00652671	22.2381
rs112966518	CD86+ myeloid DC AC	ebi-a-GCST90001464	0.00593544	20.2114
rs112186537	CD86+ myeloid DC AC	ebi-a-GCST90001464	0.00682991	23.2782
rs923967	CD86+ myeloid DC AC	ebi-a-GCST90001464	0.0058343	19.865
rs16938204	CD86+ myeloid DC AC	ebi-a-GCST90001464	0.00603581	20.5553
rs12005879	CD86+ myeloid DC AC	ebi-a-GCST90001464	0.00598563	20.3834
rs9557311	CD86+ myeloid DC AC	ebi-a-GCST90001464	0.0057776	19.6708
rs75700156	CD86+ myeloid DC AC	ebi-a-GCST90001464	0.00592817	20.1865
rs185312213	CD86+ myeloid DC AC	ebi-a-GCST90001464	0.00618884	21.0797
rs140205436	CD86+ myeloid DC AC	ebi-a-GCST90001464	0.00652908	22.2462
rs79497887	CD86+ myeloid DC AC	ebi-a-GCST90001464	0.00658487	22.4375
rs72846852	CD86+ myeloid DC AC	ebi-a-GCST90001464	0.00608454	20.7222
rs143140559	CD86+ myeloid DC %DC	ebi-a-GCST90001465	0.00770828	26.4739
rs6656063	CD86+ myeloid DC %DC	ebi-a-GCST90001465	0.0061339	21.0334
rs71639910	CD86+ myeloid DC %DC	ebi-a-GCST90001465	0.0138991	48.0358
rs3789359	CD86+ myeloid DC %DC	ebi-a-GCST90001465	0.00576838	19.7727
rs113995133	CD86+ myeloid DC %DC	ebi-a-GCST90001465	0.0078081	26.8194
rs74341264	CD86+ myeloid DC %DC	ebi-a-GCST90001465	0.0219501	76.4849
rs139939515	CD86+ myeloid DC %DC	ebi-a-GCST90001465	0.00814217	27.9763
rs71632979	CD86+ myeloid DC %DC	ebi-a-GCST90001465	0.19753	838.888
rs950485	CD86+ myeloid DC %DC	ebi-a-GCST90001465	0.00660432	22.6572
rs114566711	CD86+ myeloid DC %DC	ebi-a-GCST90001465	0.00662063	22.7135
rs1996740	CD86+ myeloid DC %DC	ebi-a-GCST90001465	0.00621123	21.3002
rs143512471	CD86+ myeloid DC %DC	ebi-a-GCST90001465	0.00613489	21.0368
rs113404917	CD86+ myeloid DC %DC	ebi-a-GCST90001465	0.00572756	19.632
rs78169719	CD86+ myeloid DC %DC	ebi-a-GCST90001465	0.00613081	21.0227
rs144259606	CD86+ myeloid DC %DC	ebi-a-GCST90001465	0.00589565	20.2115
rs77148097	CD86+ myeloid DC %DC	ebi-a-GCST90001465	0.00606383	20.7916
rs76522264	CD86+ myeloid DC %DC	ebi-a-GCST90001465	0.00636277	21.8232
rs117690664	CD86+ myeloid DC %DC	ebi-a-GCST90001465	0.00692642	23.7699
rs143555771	CD86+ myeloid DC %DC	ebi-a-GCST90001465	0.006075	20.8301
rs75358870	CD86+ myeloid DC %DC	ebi-a-GCST90001465	0.00670704	23.0119
rs140205436	CD86+ myeloid DC %DC	ebi-a-GCST90001465	0.00574425	19.6895
rs72745440	CD86+ myeloid DC %DC	ebi-a-GCST90001465	0.00635985	21.8131
rs113345111	CD86+ myeloid DC %DC	ebi-a-GCST90001465	0.00596111	20.4373
rs77768825	CD86+ myeloid DC %DC	ebi-a-GCST90001465	0.00598227	20.5103
rs56164117	CD86+ plasmacytoid DC AC	ebi-a-GCST90001466	0.00647547	21.9776
rs1991164	CD86+ plasmacytoid DC AC	ebi-a-GCST90001466	0.00641901	21.7847
rs13088702	CD86+ plasmacytoid DC AC	ebi-a-GCST90001466	0.00723629	24.5786
rs78379738	CD86+ plasmacytoid DC AC	ebi-a-GCST90001466	0.00611237	20.7377
rs10248630	CD86+ plasmacytoid DC AC	ebi-a-GCST90001466	0.00610388	20.7087
rs2725015	CD86+ plasmacytoid DC AC	ebi-a-GCST90001466	0.00794323	26.999
rs79116372	CD86+ plasmacytoid DC AC	ebi-a-GCST90001466	0.00622229	21.1129
rs140090913	CD86+ plasmacytoid DC AC	ebi-a-GCST90001466	0.00603229	20.4643
rs139557155	CD86+ plasmacytoid DC AC	ebi-a-GCST90001466	0.00654417	22.2123
rs61852527	CD86+ plasmacytoid DC AC	ebi-a-GCST90001466	0.00777977	26.4391
rs9513487	CD86+ plasmacytoid DC AC	ebi-a-GCST90001466	0.00619841	21.0314
rs142245023	CD86+ plasmacytoid DC AC	ebi-a-GCST90001466	0.00641622	21.7752
rs11852100	CD86+ plasmacytoid DC AC	ebi-a-GCST90001466	0.00682649	23.1772
rs75070627	CD86+ plasmacytoid DC AC	ebi-a-GCST90001466	0.0069675	23.6593
rs114468547	CD86+ plasmacytoid DC AC	ebi-a-GCST90001466	0.00618401	20.9822
rs118148569	CD86+ plasmacytoid DC AC	ebi-a-GCST90001466	0.00658175	22.3407
rs112496823	CD86+ plasmacytoid DC AC	ebi-a-GCST90001466	0.00692407	23.5108
rs150206669	CD86+ plasmacytoid DC AC	ebi-a-GCST90001466	0.00587102	19.914
rs313778	CD86+ plasmacytoid DC AC	ebi-a-GCST90001466	0.00586271	19.8856
rs11701450	CD86+ plasmacytoid DC AC	ebi-a-GCST90001466	0.00606583	20.5788
rs3845548	CD86+ plasmacytoid DC %DC	ebi-a-GCST90001467	0.024854	86.8612
rs513617	CD86+ plasmacytoid DC %DC	ebi-a-GCST90001467	0.00575608	19.7303
rs11811863	CD86+ plasmacytoid DC %DC	ebi-a-GCST90001467	0.00722194	24.7914
rs11166208	CD86+ plasmacytoid DC %DC	ebi-a-GCST90001467	0.00571404	19.5854
rs10170363	CD86+ plasmacytoid DC %DC	ebi-a-GCST90001467	0.00700628	24.0459
rs66967216	CD86+ plasmacytoid DC %DC	ebi-a-GCST90001467	0.00667438	22.8991
rs1915087	CD86+ plasmacytoid DC %DC	ebi-a-GCST90001467	0.00753319	25.868
rs78379738	CD86+ plasmacytoid DC %DC	ebi-a-GCST90001467	0.00651708	22.3559
rs6930632	CD86+ plasmacytoid DC %DC	ebi-a-GCST90001467	0.00624484	21.4162
rs6463191	CD86+ plasmacytoid DC %DC	ebi-a-GCST90001467	0.00670248	22.9962
rs116872766	CD86+ plasmacytoid DC %DC	ebi-a-GCST90001467	0.00717505	24.6293
rs55966096	CD86+ plasmacytoid DC %DC	ebi-a-GCST90001467	0.00682449	23.4177
rs140090913	CD86+ plasmacytoid DC %DC	ebi-a-GCST90001467	0.00655952	22.5024
rs55732541	CD86+ plasmacytoid DC %DC	ebi-a-GCST90001467	0.00589296	20.2023
rs139557155	CD86+ plasmacytoid DC %DC	ebi-a-GCST90001467	0.00751582	25.8079
rs117919713	CD86+ plasmacytoid DC %DC	ebi-a-GCST90001467	0.00594224	20.3722
rs72810797	CD86+ plasmacytoid DC %DC	ebi-a-GCST90001467	0.0060642	20.7929
rs61852527	CD86+ plasmacytoid DC %DC	ebi-a-GCST90001467	0.00862139	29.6372
rs11231693	CD86+ plasmacytoid DC %DC	ebi-a-GCST90001467	0.00678544	23.2828
rs12311260	CD86+ plasmacytoid DC %DC	ebi-a-GCST90001467	0.00616424	21.138
rs9513487	CD86+ plasmacytoid DC %DC	ebi-a-GCST90001467	0.00695803	23.8791
rs34692286	CD86+ plasmacytoid DC %DC	ebi-a-GCST90001467	0.00571936	19.6037
rs11852100	CD86+ plasmacytoid DC %DC	ebi-a-GCST90001467	0.0057887	19.8427
rs75070627	CD86+ plasmacytoid DC %DC	ebi-a-GCST90001467	0.00668634	22.9404
rs2955695	CD86+ plasmacytoid DC %DC	ebi-a-GCST90001467	0.00601475	20.6223
rs112496823	CD86+ plasmacytoid DC %DC	ebi-a-GCST90001467	0.00668743	22.9442
rs71381356	CD86+ plasmacytoid DC %DC	ebi-a-GCST90001467	0.00634471	21.7609
rs150206669	CD86+ plasmacytoid DC %DC	ebi-a-GCST90001467	0.00579537	19.8657
rs62131897	CD86+ plasmacytoid DC %DC	ebi-a-GCST90001467	0.00577478	19.7948
rs9607320	CD86+ plasmacytoid DC %DC	ebi-a-GCST90001467	0.00625935	21.4662
rs74341264	CD62L- myeloid DC AC	ebi-a-GCST90001468	0.0296758	103.525
rs71632979	CD62L- myeloid DC AC	ebi-a-GCST90001468	0.199373	842.939
rs17438107	CD62L- myeloid DC AC	ebi-a-GCST90001468	0.00669459	22.8139
rs143140559	CD62L- myeloid DC AC	ebi-a-GCST90001468	0.0115885	39.6869
rs71639910	CD62L- myeloid DC AC	ebi-a-GCST90001468	0.0172417	59.387
rs147678401	CD62L- myeloid DC AC	ebi-a-GCST90001468	0.00774687	26.4279
rs10779896	CD62L- myeloid DC AC	ebi-a-GCST90001468	0.00575511	19.5938
rs73172229	CD62L- myeloid DC AC	ebi-a-GCST90001468	0.00671953	22.8995
rs13148506	CD62L- myeloid DC AC	ebi-a-GCST90001468	0.00676971	23.0717
rs116910026	CD62L- myeloid DC AC	ebi-a-GCST90001468	0.00739268	25.2106
rs4997747	CD62L- myeloid DC AC	ebi-a-GCST90001468	0.00656981	22.3859
rs11830537	CD62L- myeloid DC AC	ebi-a-GCST90001468	0.00593607	20.2136
rs17071426	CD62L- myeloid DC AC	ebi-a-GCST90001468	0.00580014	19.748
rs35519924	CD62L- myeloid DC AC	ebi-a-GCST90001468	0.00612868	20.8735
rs112701148	CD62L- myeloid DC AC	ebi-a-GCST90001468	0.00594167	20.2328
rs112501424	CD62L- myeloid DC AC	ebi-a-GCST90001468	0.00586996	19.9871
rs5767014	CD62L- myeloid DC AC	ebi-a-GCST90001468	0.00602568	20.5206
rs6537835	CD62L- myeloid DC %DC	ebi-a-GCST90001469	0.00593885	20.3605
rs74341264	CD62L- myeloid DC %DC	ebi-a-GCST90001469	0.0333876	117.715
rs147678401	CD62L- myeloid DC %DC	ebi-a-GCST90001469	0.00677216	23.2369
rs34558449	CD62L- myeloid DC %DC	ebi-a-GCST90001469	0.00715562	24.5621
rs143140559	CD62L- myeloid DC %DC	ebi-a-GCST90001469	0.0108908	37.5244
rs17438107	CD62L- myeloid DC %DC	ebi-a-GCST90001469	0.00581005	19.9164
rs71632979	CD62L- myeloid DC %DC	ebi-a-GCST90001469	0.211122	912.059
rs71639910	CD62L- myeloid DC %DC	ebi-a-GCST90001469	0.0190287	66.1077
rs10779896	CD62L- myeloid DC %DC	ebi-a-GCST90001469	0.00620925	21.2933
rs143586943	CD62L- myeloid DC %DC	ebi-a-GCST90001469	0.00581648	19.9385
rs16864449	CD62L- myeloid DC %DC	ebi-a-GCST90001469	0.00640163	21.9573
rs17637703	CD62L- myeloid DC %DC	ebi-a-GCST90001469	0.00622514	21.3482
rs530300575	CD62L- myeloid DC %DC	ebi-a-GCST90001469	0.00643092	22.0584
rs62300075	CD62L- myeloid DC %DC	ebi-a-GCST90001469	0.00776079	26.6556
rs75220521	CD62L- myeloid DC %DC	ebi-a-GCST90001469	0.00626513	21.4862
rs3012723	CD62L- myeloid DC %DC	ebi-a-GCST90001469	0.00575555	19.7285
rs181905377	CD62L- myeloid DC %DC	ebi-a-GCST90001469	0.00575253	19.7181
rs149812305	CD62L- myeloid DC %DC	ebi-a-GCST90001469	0.00580341	19.8935
rs116910026	CD62L- myeloid DC %DC	ebi-a-GCST90001469	0.00665419	22.8294
rs7300606	CD62L- myeloid DC %DC	ebi-a-GCST90001469	0.00579855	19.8767
rs6492701	CD62L- myeloid DC %DC	ebi-a-GCST90001469	0.00585	20.0541
rs7148140	CD62L- myeloid DC %DC	ebi-a-GCST90001469	0.00573659	19.6631
rs17780615	CD62L- myeloid DC %DC	ebi-a-GCST90001469	0.0058698	20.1224
rs72743439	CD62L- myeloid DC %DC	ebi-a-GCST90001469	0.00616768	21.1499
rs116473040	CD62L- myeloid DC %DC	ebi-a-GCST90001469	0.00587472	20.1394
rs5767014	CD62L- myeloid DC %DC	ebi-a-GCST90001469	0.00719287	24.6909
rs4462104	CD62L- plasmacytoid DC AC	ebi-a-GCST90001470	0.0063146	21.4282
rs12061996	CD62L- plasmacytoid DC AC	ebi-a-GCST90001470	0.00597906	20.2827
rs17224524	CD62L- plasmacytoid DC AC	ebi-a-GCST90001470	0.00646554	21.9437
rs116054627	CD62L- plasmacytoid DC AC	ebi-a-GCST90001470	0.00872596	29.6829
rs75472065	CD62L- plasmacytoid DC AC	ebi-a-GCST90001470	0.00590142	20.0177
rs4928176	CD62L- plasmacytoid DC AC	ebi-a-GCST90001470	0.0061162	20.7508
rs191779135	CD62L- plasmacytoid DC AC	ebi-a-GCST90001470	0.0108245	36.8995
rs6535445	CD62L- plasmacytoid DC AC	ebi-a-GCST90001470	0.035019	122.369
rs1472757	CD62L- plasmacytoid DC AC	ebi-a-GCST90001470	0.00740787	25.1658
rs1391986	CD62L- plasmacytoid DC AC	ebi-a-GCST90001470	0.00646988	21.9585
rs9502274	CD62L- plasmacytoid DC AC	ebi-a-GCST90001470	0.00586792	19.9034
rs13201703	CD62L- plasmacytoid DC AC	ebi-a-GCST90001470	0.00593223	20.1228
rs9403901	CD62L- plasmacytoid DC AC	ebi-a-GCST90001470	0.00605425	20.5393
rs56374915	CD62L- plasmacytoid DC AC	ebi-a-GCST90001470	0.0065453	22.2162
rs72716416	CD62L- plasmacytoid DC AC	ebi-a-GCST90001470	0.00583255	19.7827
rs118054784	CD62L- plasmacytoid DC AC	ebi-a-GCST90001470	0.00680137	23.0913
rs116894787	CD62L- plasmacytoid DC AC	ebi-a-GCST90001470	0.00641319	21.7649
rs7114664	CD62L- plasmacytoid DC AC	ebi-a-GCST90001470	0.00656076	22.269
rs61936377	CD62L- plasmacytoid DC AC	ebi-a-GCST90001470	0.00687659	23.3484
rs16957038	CD62L- plasmacytoid DC AC	ebi-a-GCST90001470	0.00663289	22.5154
rs170697	CD62L- plasmacytoid DC AC	ebi-a-GCST90001470	0.00641319	21.7649
rs9900969	CD62L- plasmacytoid DC AC	ebi-a-GCST90001470	0.00589214	19.9861
rs11659751	CD62L- plasmacytoid DC AC	ebi-a-GCST90001470	0.006193	21.0129
rs150918748	CD62L- plasmacytoid DC AC	ebi-a-GCST90001470	0.00609233	20.6693
rs4462104	CD62L- plasmacytoid DC %DC	ebi-a-GCST90001471	0.00604275	20.7189
rs55971447	CD62L- plasmacytoid DC %DC	ebi-a-GCST90001471	0.0306651	107.813
rs116054627	CD62L- plasmacytoid DC %DC	ebi-a-GCST90001471	0.00642768	22.0472
rs148594241	CD62L- plasmacytoid DC %DC	ebi-a-GCST90001471	0.00598027	20.5034
rs79976443	CD62L- plasmacytoid DC %DC	ebi-a-GCST90001471	0.00583041	19.9866
rs75472065	CD62L- plasmacytoid DC %DC	ebi-a-GCST90001471	0.00602477	20.6569
rs62297340	CD62L- plasmacytoid DC %DC	ebi-a-GCST90001471	0.00632145	21.6806
rs79659729	CD62L- plasmacytoid DC %DC	ebi-a-GCST90001471	0.00579256	19.856
rs6535445	CD62L- plasmacytoid DC %DC	ebi-a-GCST90001471	0.0393177	139.479
rs191779135	CD62L- plasmacytoid DC %DC	ebi-a-GCST90001471	0.0105833	36.4535
rs148863428	CD62L- plasmacytoid DC %DC	ebi-a-GCST90001471	0.00608458	20.8632
rs1835019	CD62L- plasmacytoid DC %DC	ebi-a-GCST90001471	0.00595065	20.4012
rs56374915	CD62L- plasmacytoid DC %DC	ebi-a-GCST90001471	0.00592443	20.3108
rs62495198	CD62L- plasmacytoid DC %DC	ebi-a-GCST90001471	0.00575363	19.7218
rs61859443	CD62L- plasmacytoid DC %DC	ebi-a-GCST90001471	0.00581073	19.9187
rs146839224	CD62L- plasmacytoid DC %DC	ebi-a-GCST90001471	0.00679596	23.3191
rs11000032	CD62L- plasmacytoid DC %DC	ebi-a-GCST90001471	0.00635308	21.7897
rs182833362	CD62L- plasmacytoid DC %DC	ebi-a-GCST90001471	0.00664741	22.806
rs8044705	CD62L- plasmacytoid DC %DC	ebi-a-GCST90001471	0.00571657	19.5941
rs3827963	CD62L- plasmacytoid DC %DC	ebi-a-GCST90001471	0.00613784	21.0469
rs147678401	CD62L- CD86+ myeloid DC AC	ebi-a-GCST90001472	0.00829189	28.3027
rs74341264	CD62L- CD86+ myeloid DC AC	ebi-a-GCST90001472	0.0364229	127.952
rs2788088	CD62L- CD86+ myeloid DC AC	ebi-a-GCST90001472	0.00648054	22.0797
rs71639910	CD62L- CD86+ myeloid DC AC	ebi-a-GCST90001472	0.0193773	66.8883
rs61808511	CD62L- CD86+ myeloid DC AC	ebi-a-GCST90001472	0.00586561	19.9722
rs113995133	CD62L- CD86+ myeloid DC AC	ebi-a-GCST90001472	0.00655661	22.3406
rs71632979	CD62L- CD86+ myeloid DC AC	ebi-a-GCST90001472	0.256846	1169.91
rs6656063	CD62L- CD86+ myeloid DC AC	ebi-a-GCST90001472	0.00583628	19.8718
rs77107932	CD62L- CD86+ myeloid DC AC	ebi-a-GCST90001472	0.00769887	26.2629
rs143140559	CD62L- CD86+ myeloid DC AC	ebi-a-GCST90001472	0.0101383	34.6696
rs10779896	CD62L- CD86+ myeloid DC AC	ebi-a-GCST90001472	0.0060966	20.7636
rs146507670	CD62L- CD86+ myeloid DC AC	ebi-a-GCST90001472	0.00596121	20.2997
rs162588	CD62L- CD86+ myeloid DC AC	ebi-a-GCST90001472	0.00700811	23.8899
rs144101090	CD62L- CD86+ myeloid DC AC	ebi-a-GCST90001472	0.00579608	19.7341
rs112186537	CD62L- CD86+ myeloid DC AC	ebi-a-GCST90001472	0.00674333	22.9811
rs117044176	CD62L- CD86+ myeloid DC AC	ebi-a-GCST90001472	0.00585505	19.9361
rs117690664	CD62L- CD86+ myeloid DC AC	ebi-a-GCST90001472	0.00615506	20.9639
rs62489014	CD62L- CD86+ myeloid DC AC	ebi-a-GCST90001472	0.00578905	19.71
rs139956891	CD62L- CD86+ myeloid DC AC	ebi-a-GCST90001472	0.00711774	24.2663
rs11830537	CD62L- CD86+ myeloid DC AC	ebi-a-GCST90001472	0.00591859	20.1537
rs135299	CD62L- CD86+ myeloid DC AC	ebi-a-GCST90001472	0.00619506	21.101
rs2788088	CD62L- CD86+ myeloid DC %DC	ebi-a-GCST90001473	0.00648715	22.2526
rs147678401	CD62L- CD86+ myeloid DC %DC	ebi-a-GCST90001473	0.0073848	25.3546
rs71639910	CD62L- CD86+ myeloid DC %DC	ebi-a-GCST90001473	0.0193726	67.3261
rs113995133	CD62L- CD86+ myeloid DC %DC	ebi-a-GCST90001473	0.00757744	26.0211
rs6537835	CD62L- CD86+ myeloid DC %DC	ebi-a-GCST90001473	0.0061561	21.11
rs79078281	CD62L- CD86+ myeloid DC %DC	ebi-a-GCST90001473	0.00609719	20.9067
rs74341264	CD62L- CD86+ myeloid DC %DC	ebi-a-GCST90001473	0.0363702	128.628
rs71632979	CD62L- CD86+ myeloid DC %DC	ebi-a-GCST90001473	0.260561	1200.9
rs77107932	CD62L- CD86+ myeloid DC %DC	ebi-a-GCST90001473	0.00781646	26.8484
rs143140559	CD62L- CD86+ myeloid DC %DC	ebi-a-GCST90001473	0.0088188	30.3219
rs10779896	CD62L- CD86+ myeloid DC %DC	ebi-a-GCST90001473	0.00609438	20.897
rs162588	CD62L- CD86+ myeloid DC %DC	ebi-a-GCST90001473	0.0059017	20.2324
rs117690664	CD62L- CD86+ myeloid DC %DC	ebi-a-GCST90001473	0.0071528	24.5524
rs144030104	CD62L- CD86+ myeloid DC %DC	ebi-a-GCST90001473	0.00585827	20.0826
rs72659736	CD62L- CD86+ myeloid DC %DC	ebi-a-GCST90001473	0.00591527	20.2792
rs139956891	CD62L- CD86+ myeloid DC %DC	ebi-a-GCST90001473	0.00592991	20.3297
rs4761369	CD62L- CD86+ myeloid DC %DC	ebi-a-GCST90001473	0.00634159	21.7501
rs113704374	CD62L- CD86+ myeloid DC %DC	ebi-a-GCST90001473	0.00576378	19.7568
rs500809	CD62L- CD86+ myeloid DC %DC	ebi-a-GCST90001473	0.00617091	21.161
rs5767014	CD62L- CD86+ myeloid DC %DC	ebi-a-GCST90001473	0.00607034	20.8141
rs10910893	Plasmacytoid DC %DC	ebi-a-GCST90001474	0.0062384	21.3939
rs143032729	Plasmacytoid DC %DC	ebi-a-GCST90001474	0.00866601	29.792
rs74341264	Plasmacytoid DC %DC	ebi-a-GCST90001474	0.0121337	41.8597
rs56199187	Plasmacytoid DC %DC	ebi-a-GCST90001474	0.11483	442.107
rs7593638	Plasmacytoid DC %DC	ebi-a-GCST90001474	0.0077663	26.6747
rs2164210	Plasmacytoid DC %DC	ebi-a-GCST90001474	0.00577584	19.7984
rs62234997	Plasmacytoid DC %DC	ebi-a-GCST90001474	0.00624971	21.4329
rs62272723	Plasmacytoid DC %DC	ebi-a-GCST90001474	0.00654657	22.4577
rs11715127	Plasmacytoid DC %DC	ebi-a-GCST90001474	0.00615062	21.091
rs7566	Plasmacytoid DC %DC	ebi-a-GCST90001474	0.00570986	19.5709
rs196051	Plasmacytoid DC %DC	ebi-a-GCST90001474	0.00639161	21.9227
rs876036	Plasmacytoid DC %DC	ebi-a-GCST90001474	0.0117248	40.432
rs78726632	Plasmacytoid DC %DC	ebi-a-GCST90001474	0.00692392	23.7612
rs4398989	Plasmacytoid DC %DC	ebi-a-GCST90001474	0.00613389	21.0333
rs10759202	Plasmacytoid DC %DC	ebi-a-GCST90001474	0.00571583	19.5915
rs4752481	Plasmacytoid DC %DC	ebi-a-GCST90001474	0.00719827	24.7096
rs79053113	Plasmacytoid DC %DC	ebi-a-GCST90001474	0.00632775	21.7023
rs607867	Plasmacytoid DC %DC	ebi-a-GCST90001474	0.00605776	20.7707
rs75812106	Plasmacytoid DC %DC	ebi-a-GCST90001474	0.0059025	20.2351
rs28595889	Plasmacytoid DC %DC	ebi-a-GCST90001474	0.00580332	19.8931
rs10735429	Plasmacytoid DC %DC	ebi-a-GCST90001474	0.00610302	20.9268
rs73180904	Plasmacytoid DC %DC	ebi-a-GCST90001474	0.00599115	20.5409
rs690924	Plasmacytoid DC %DC	ebi-a-GCST90001474	0.00592244	20.3039
rs12951038	Plasmacytoid DC %DC	ebi-a-GCST90001474	0.00588472	20.1738
rs203393	Plasmacytoid DC %DC	ebi-a-GCST90001474	0.0068741	23.5891
rs76950373	HLA DR++ monocyte %monocyte	ebi-a-GCST90001475	0.00543344	19.629
rs9439731	HLA DR++ monocyte %monocyte	ebi-a-GCST90001475	0.00607549	21.9627
rs7538058	HLA DR++ monocyte %monocyte	ebi-a-GCST90001475	0.00550168	19.8769
rs116670542	HLA DR++ monocyte %monocyte	ebi-a-GCST90001475	0.00591743	21.3879
rs187260865	HLA DR++ monocyte %monocyte	ebi-a-GCST90001475	0.0079623	28.8382
rs17023874	HLA DR++ monocyte %monocyte	ebi-a-GCST90001475	0.00554622	20.0387
rs7624992	HLA DR++ monocyte %monocyte	ebi-a-GCST90001475	0.00543615	19.6388
rs2878953	HLA DR++ monocyte %monocyte	ebi-a-GCST90001475	0.00542393	19.5945
rs62395272	HLA DR++ monocyte %monocyte	ebi-a-GCST90001475	0.0108364	39.3617
rs9271281	HLA DR++ monocyte %monocyte	ebi-a-GCST90001475	0.0267704	98.8319
rs9271768	HLA DR++ monocyte %monocyte	ebi-a-GCST90001475	0.0162375	59.3044
rs9296042	HLA DR++ monocyte %monocyte	ebi-a-GCST90001475	0.011856	43.1097
rs9469094	HLA DR++ monocyte %monocyte	ebi-a-GCST90001475	0.0114075	41.4601
rs116322630	HLA DR++ monocyte %monocyte	ebi-a-GCST90001475	0.00685261	24.7913
rs2090888	HLA DR++ monocyte %monocyte	ebi-a-GCST90001475	0.0054328	19.6267
rs2113347	HLA DR++ monocyte %monocyte	ebi-a-GCST90001475	0.00587297	21.2262
rs61835728	HLA DR++ monocyte %monocyte	ebi-a-GCST90001475	0.00550194	19.8778
rs150066324	HLA DR++ monocyte %monocyte	ebi-a-GCST90001475	0.00545881	19.7212
rs7953257	HLA DR++ monocyte %monocyte	ebi-a-GCST90001475	0.00697181	25.2256
rs12436392	HLA DR++ monocyte %monocyte	ebi-a-GCST90001475	0.00606519	21.9252
rs62083470	HLA DR++ monocyte %monocyte	ebi-a-GCST90001475	0.00610837	22.0823
rs10410907	HLA DR++ monocyte %monocyte	ebi-a-GCST90001475	0.00571323	20.6456
rs6010756	HLA DR++ monocyte %monocyte	ebi-a-GCST90001475	0.00611414	22.1032
rs9439732	HLA DR++ monocyte %leukocyte	ebi-a-GCST90001476	0.00760201	27.5233
rs35478452	HLA DR++ monocyte %leukocyte	ebi-a-GCST90001476	0.00596666	21.5669
rs115589615	HLA DR++ monocyte %leukocyte	ebi-a-GCST90001476	0.00669571	24.2199
rs9271768	HLA DR++ monocyte %leukocyte	ebi-a-GCST90001476	0.0121013	44.0128
rs62395272	HLA DR++ monocyte %leukocyte	ebi-a-GCST90001476	0.00660153	23.8769
rs9270591	HLA DR++ monocyte %leukocyte	ebi-a-GCST90001476	0.0204106	74.8633
rs9296042	HLA DR++ monocyte %leukocyte	ebi-a-GCST90001476	0.00810699	29.3665
rs76115039	HLA DR++ monocyte %leukocyte	ebi-a-GCST90001476	0.00563452	20.3596
rs9615878	HLA DR++ monocyte %leukocyte	ebi-a-GCST90001476	0.0054612	19.7299
rs12410580	HLA DR++ monocyte AC	ebi-a-GCST90001477	0.0055394	19.9248
rs10753675	HLA DR++ monocyte AC	ebi-a-GCST90001477	0.00557138	20.0405
rs115589615	HLA DR++ monocyte AC	ebi-a-GCST90001477	0.00693821	24.9914
rs138955284	HLA DR++ monocyte AC	ebi-a-GCST90001477	0.00715005	25.7599
rs114141703	HLA DR++ monocyte AC	ebi-a-GCST90001477	0.00636532	22.9146
rs74827437	HLA DR++ monocyte AC	ebi-a-GCST90001477	0.00590006	21.2298
rs12659610	HLA DR++ monocyte AC	ebi-a-GCST90001477	0.00566844	20.3916
rs73576356	HLA DR++ monocyte AC	ebi-a-GCST90001477	0.00580951	20.902
rs9272459	HLA DR++ monocyte AC	ebi-a-GCST90001477	0.00860852	31.0601
rs62395272	HLA DR++ monocyte AC	ebi-a-GCST90001477	0.00695236	25.0427
rs9275271	HLA DR++ monocyte AC	ebi-a-GCST90001477	0.0163249	59.3631
rs112700313	HLA DR++ monocyte AC	ebi-a-GCST90001477	0.00558579	20.0926
rs28610544	HLA DR++ monocyte AC	ebi-a-GCST90001477	0.00734201	26.4566
rs117433119	HLA DR++ monocyte AC	ebi-a-GCST90001477	0.00577034	20.7603
rs16901587	HLA DR++ monocyte AC	ebi-a-GCST90001477	0.00574794	20.6792
rs35842632	HLA DR++ monocyte AC	ebi-a-GCST90001477	0.00553903	19.9235
rs4244738	HLA DR++ monocyte AC	ebi-a-GCST90001477	0.00562589	20.2377
rs7310615	HLA DR++ monocyte AC	ebi-a-GCST90001477	0.00813641	29.3427
rs11169475	HLA DR++ monocyte AC	ebi-a-GCST90001477	0.0059633	21.4587
rs111801150	HLA DR++ monocyte AC	ebi-a-GCST90001477	0.00650537	23.4221
rs55952218	HLA DR++ monocyte AC	ebi-a-GCST90001477	0.00622161	22.394
rs183181627	HLA DR++ monocyte AC	ebi-a-GCST90001477	0.00626723	22.5593
rs34795364	HLA DR++ monocyte AC	ebi-a-GCST90001477	0.00586236	21.0933
rs139181645	HLA DR++ monocyte AC	ebi-a-GCST90001477	0.00628547	22.6254
rs61289229	HLA DR++ monocyte AC	ebi-a-GCST90001477	0.00625916	22.5301
rs5995959	HLA DR++ monocyte AC	ebi-a-GCST90001477	0.00598372	21.5326
rs181741769	CD4 Treg %CD4	ebi-a-GCST90001478	0.00620463	21.446
rs13410035	CD4 Treg %CD4	ebi-a-GCST90001478	0.00678354	23.4606
rs17009374	CD4 Treg %CD4	ebi-a-GCST90001478	0.00600965	20.768
rs4685760	CD4 Treg %CD4	ebi-a-GCST90001478	0.00576555	19.9195
rs12186662	CD4 Treg %CD4	ebi-a-GCST90001478	0.00576591	19.9208
rs77142596	CD4 Treg %CD4	ebi-a-GCST90001478	0.00609508	21.065
rs2187822	CD4 Treg %CD4	ebi-a-GCST90001478	0.00608705	21.0371
rs191172032	CD4 Treg %CD4	ebi-a-GCST90001478	0.00635828	21.9805
rs77615103	CD4 Treg %CD4	ebi-a-GCST90001478	0.00725578	25.1058
rs138899232	CD4 Treg %CD4	ebi-a-GCST90001478	0.00583504	20.161
rs1571025	CD4 Treg %CD4	ebi-a-GCST90001478	0.0146341	51.0148
rs6602392	CD4 Treg %CD4	ebi-a-GCST90001478	0.00883457	30.6172
rs73018933	CD4 Treg %CD4	ebi-a-GCST90001478	0.00582001	20.1088
rs77071786	CD4 Treg %CD4	ebi-a-GCST90001478	0.0079899	27.6664
rs149595513	CD4 Treg %CD4	ebi-a-GCST90001478	0.00607004	20.9779
rs146090095	CD4 Treg %CD4	ebi-a-GCST90001478	0.00599589	20.7201
rs79028902	CD4 Treg %CD4	ebi-a-GCST90001478	0.00567694	19.6116
rs72821912	CD4 Treg %CD4	ebi-a-GCST90001478	0.00626047	21.6402
rs2909902	CD4 Treg %CD4	ebi-a-GCST90001478	0.0068897	23.8303
rs6016476	CD4 Treg %CD4	ebi-a-GCST90001478	0.00609108	21.0511
rs79327855	CD4 Treg %T cell	ebi-a-GCST90001479	0.0065139	22.522
rs76239041	CD4 Treg %T cell	ebi-a-GCST90001479	0.00711964	24.6313
rs219948	CD4 Treg %T cell	ebi-a-GCST90001479	0.00593523	20.5092
rs2975007	CD4 Treg %T cell	ebi-a-GCST90001479	0.0067442	23.3236
rs971864	CD4 Treg %T cell	ebi-a-GCST90001479	0.00609709	21.072
rs115707165	CD4 Treg %T cell	ebi-a-GCST90001479	0.00575191	19.8721
rs28445004	CD4 Treg %T cell	ebi-a-GCST90001479	0.00567068	19.5899
rs6602392	CD4 Treg %T cell	ebi-a-GCST90001479	0.00655656	22.6704
[truncated: 16,653 more rows]
